# Supplementary material for: Development of prediction models for complications after primary total hip and knee arthroplasty: a single-centre retrospective cohort study in the Netherlands
Source: PubMed Central journal article supplement — BMJ Open. 2022 Aug 24;12(8):e062065. doi: 10.1136/bmjopen-2022-062065 (PMC9413190; doi:10.1136/bmjopen-2022-062065), 2022-08-24
Supplement: bmjopen-2022-062065.draft_revisions.pdf [file bmjopen-2022-062065.draft_revisions.pdf]

# BMJ Open

BMJ Open is committed to open peer review. As part of this commitment we make the peer review history of every article we publish publicly available.

When an article is published we post the peer reviewers' comments and the authors' responses online. We also post the versions of the paper that were used during peer review. These are the versions that the peer review comments apply to.

The versions of the paper that follow are the versions that were submitted during the peer review process. They are not the versions of record or the final published versions. They should not be cited or distributed as the published version of this manuscript.

BMJ Open is an open access journal and the full, final, typeset and author-corrected version of record of the manuscript is available on our site with no access controls, subscription charges or pay-per-view fees (<http://bmjopen.bmj.com>).

If you have any questions on BMJ Open's open peer review process please email [info.bmjopen@bmj.com](mailto:info.bmjopen@bmj.com)

# BMJ Open

## Patient specific prediction models for complications after total hip- and knee arthroplasty.

|                               |                                                                                                                                                                                                                                                                                                                                                                          |
|-------------------------------|--------------------------------------------------------------------------------------------------------------------------------------------------------------------------------------------------------------------------------------------------------------------------------------------------------------------------------------------------------------------------|
| Journal:                      | <i>BMJ Open</i>                                                                                                                                                                                                                                                                                                                                                          |
| Manuscript ID                 | bmjopen-2022-062065                                                                                                                                                                                                                                                                                                                                                      |
| Article Type:                 | Original research                                                                                                                                                                                                                                                                                                                                                        |
| Date Submitted by the Author: | 16-Feb-2022                                                                                                                                                                                                                                                                                                                                                              |
| Complete List of Authors:     | Sweerts, Lieke; Radboudumc, Department of Orthopaedics; Radboudumc, IQ healthcare<br>Hoogeboom, Thomas J; Radboudumc, IQ healthcare<br>van Wessel, Thierry; Radboudumc, Department of Orthopaedics<br>Van der Wees, Philip; Radboudumc, IQ healthcare; Radboudumc, Department of Rehabilitation<br>van de Groes, Sebastiaan A.W.; Radboudumc, Department of Orthopaedics |
| Keywords:                     | Hip < ORTHOPAEDIC & TRAUMA SURGERY, Knee < ORTHOPAEDIC & TRAUMA SURGERY, ORTHOPAEDIC & TRAUMA SURGERY                                                                                                                                                                                                                                                                    |
|                               |                                                                                                                                                                                                                                                                                                                                                                          |

SCHOLARONE™  
Manuscripts

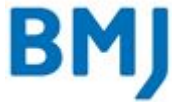

I, the Submitting Author has the right to grant and does grant on behalf of all authors of the Work (as defined in the below author licence), an exclusive licence and/or a non-exclusive licence for contributions from authors who are: i) UK Crown employees; ii) where BMJ has agreed a CC-BY licence shall apply, and/or iii) in accordance with the terms applicable for US Federal Government officers or employees acting as part of their official duties; on a worldwide, perpetual, irrevocable, royalty-free basis to BMJ Publishing Group Ltd ("BMJ") its licensees and where the relevant Journal is co-owned by BMJ to the co-owners of the Journal, to publish the Work in this journal and any other BMJ products and to exploit all rights, as set out in our [licence](#).

The Submitting Author accepts and understands that any supply made under these terms is made by BMJ to the Submitting Author unless you are acting as an employee on behalf of your employer or a postgraduate student of an affiliated institution which is paying any applicable article publishing charge ("APC") for Open Access articles. Where the Submitting Author wishes to make the Work available on an Open Access basis (and intends to pay the relevant APC), the terms of reuse of such Open Access shall be governed by a Creative Commons licence – details of these licences and which [Creative Commons](#) licence will apply to this Work are set out in our licence referred to above.

Other than as permitted in any relevant BMJ Author's Self Archiving Policies, I confirm this Work has not been accepted for publication elsewhere, is not being considered for publication elsewhere and does not duplicate material already published. I confirm all authors consent to publication of this Work and authorise the granting of this licence.

1  
2  
3 **Title Page**  
4  
5  
6

7 (1) Title

8 Patient specific prediction models for complications after total hip- and knee arthroplasty.  
9  
10

11  
12 (2) Authors' names

13  
14 Lieke Sweerts MSc<sup>1,2</sup>, Thomas J. Hoogeboom, PhD<sup>2</sup>, Thierry van Wessel MSc<sup>1</sup>, Philip J. van der Wees,  
15  
16 PhD<sup>2,3</sup>, Sebastiaan A.W. van de Groes, MD, PhD, BEng<sup>1</sup>  
17  
18

19  
20 (3) Institution(s) at which the work was performed

21 (4) Institution (and city and state or country) with which each author is affiliated

22  
23  
24 <sup>1</sup> Radboud university medical center, Radboud Institute for Health Sciences, Department of  
25  
26 Orthopaedics, Nijmegen, The Netherlands

27  
28 <sup>2</sup> Radboud university medical center, Radboud Institute for Health Sciences, IQ healthcare, Nijmegen,  
29  
30 The Netherlands

31  
32 <sup>3</sup> Radboud university medical center, Radboud Institute for Health Sciences, Department of  
33  
34 Rehabilitation, Nijmegen, The Netherlands

35  
36  
37 (5) Email addresses

38  
39 [Lieke.Sweerts@radboudumc.nl](mailto:Lieke.Sweerts@radboudumc.nl)

40  
41 [Thomas.Hoogeboom@radboudumc.nl](mailto:Thomas.Hoogeboom@radboudumc.nl)

42  
43 [Thierry.vanWessel@radboudumc.nl](mailto:Thierry.vanWessel@radboudumc.nl)

44  
45 [Philip.vanderWees@radboudumc.nl](mailto:Philip.vanderWees@radboudumc.nl)

46  
47 [Sebastiaan.vandeGroes@radboudumc.nl](mailto:Sebastiaan.vandeGroes@radboudumc.nl)  
48  
49

50  
51 (6) Corresponding author and e-mail address

52  
53 Lieke Sweerts, [Lieke.Sweerts@radboudumc.nl](mailto:Lieke.Sweerts@radboudumc.nl)

54  
55 Postbus 9101

56  
57 6500 HB Nijmegen

58  
59 The Netherlands  
60

1  
2  
3  
4  
5  
6  
7  
8  
9  
10  
11  
12  
13  
14  
15  
16  
17  
18  
19  
20  
21  
22  
23  
24  
25  
26  
27  
28  
29  
30  
31  
32  
33  
34  
35  
36  
37  
38  
39  
40  
41  
42  
43  
44  
45  
46  
47  
48  
49  
50  
51  
52  
53  
54  
55  
56  
57  
58  
59  
60

(7) Word count

Abstract: 256

Manuscript: 2,937

For peer review only

## Abstract

*Objective.* The aim of the study was to develop prediction models for patients with THA and TKA to predict the risk for surgical complications based on personal factors, comorbidities, and medication use.

*Setting.* Tertiary Care in outpatient clinic of university medical center.

*Participants.* 3,776 patients with a primary THA or TKA between 2004 and 2018.

*Primary and secondary outcome measures.* Multivariable logistic regression models were developed for primary outcome surgical site infection, and secondary outcomes venous thromboembolism, postoperative bleeding, luxation, delirium, and nerve damage.

*Results.* For surgical site infection, age, smoking status, BMI, presence of immunological disorder, diabetes mellitus, liver disease, and use of NSAID's were included. Liver disease showed to be the strongest predictor with an odds ratio of 10.7 (95%-CI=2.4-46.6). An area under the curve (AUC) of 71.9% (95%-CI=69.4-74.4) was found. Postoperative bleeding and nerve damage showed an AUC of 73.0% and 76.6% respectively. For delirium an AUC of 85.9% was found, and for the predictive algorithms for luxation and venous thromboembolism we found least favorable results (AUC= 58.4% and 66.3%).

*Conclusions.* Discriminative ability was reasonable for surgical site infection and predicted probabilities ranged between 0.01%-51.0%. We expect this to enhance shared decision making in considering THA or TKA since current counseling is predicated on population-based probability of risk, rather than using personalized prediction. We consider our models for surgical site infection, delirium and nerve damage appropriate for clinical use when taking under- and overestimation of predicted risk into account. For venous thromboembolism and postoperative bleeding caution concerning overestimation should be taken into account.

*Keywords.* total hip arthroplasty; total knee arthroplasty; surgical complications; prediction; prognosis; comorbidities; medication use

### *Strengths and limitations of this study.*

- The predictors are easily to assess and thereby easily to implement in care
- No additional patient information is needed since data is collected in usual care

1  
2  
3  
4  
5  
6  
7  
8  
9  
10  
11  
12  
13  
14  
15  
16  
17  
18  
19  
20  
21  
22  
23  
24  
25  
26  
27  
28  
29  
30  
31  
32  
33  
34  
35  
36  
37  
38  
39  
40  
41  
42  
43  
44  
45  
46  
47  
48  
49  
50  
51  
52  
53  
54  
55  
56  
57  
58  
59  
60

- Used data was not primarily registered for research purposes and therefore their detail and accuracy could be less than optimal
- External validity and clinical impact of the models is not determined yet

For peer review only

## Introduction

Joint replacement is a recommended intervention for people with end stage hip or knee osteoarthritis.<sup>1</sup>

Whether surgery is the best solution depends on many individual factors such as severity of the disease, level of experienced pain and discomfort, medication use, personal circumstances, comorbid diseases, and intended type of surgery.<sup>2-4</sup> Because the decision to have surgery or not is complex, a shared decision making (SDM) process is warranted. This process allows patients and clinicians to discuss treatment options consistent with the patient's values and preferences.<sup>5</sup>

Information on most likely prognosis is central in this dialogue as the clinician provides guidance and information about expected outcomes, including the risk on surgical complications, when facing the decision to pursue or forgo surgery. However, providing personalized information about the risk on surgical complications, based on personal characteristics of the patient, is challenging. Available evidence often consists of average outcomes and current guidelines on prediction of outcome still recommend counselling predicated on population-based probability of risk, rather than using personalized prediction.<sup>6</sup>

To overcome this problem, the development of prediction models is emerging. It has been shown that useful prediction on postoperative outcome can be made predicated on preoperative data like demographic factors, pain scores, and physical functioning measured with Patient Reported Outcome Measures (PROMs), to identify patients at risk of not benefitting from total knee arthroplasty (TKA) in general.<sup>7-9</sup> Another study developed a preoperative prediction model to predict residual complaints on pain, functional outcome and treatment success for individual patients after TKA.<sup>10</sup> To our knowledge, none of the currently available prediction models predict the risk for surgical complications, such as surgical site infections. This is remarkable, as discussing potential risks is an important aspect of SDM.<sup>11</sup>

12

It is known that personal factors including demographic characteristics and comorbidities have an impact on surgical complications,<sup>3</sup> and might therefore serve as basis for a risk prediction model. Therefore, the aim of this study is to develop a prediction model for clinicians and patients with hip- or knee osteoarthritis considering surgery, by predicting risk for surgical complications based on personal factors, comorbidities and medication use.



## Methods

### *Study design and setting*

For this retrospective cohort study, we established a cohort of patients who underwent primary total hip- (THA) or TKA between 2004 and 2018 at the Orthopedic department of Radboud university medical center Nijmegen, the Netherlands. Datasets were merged into one centralized database based on patient-number, birthdate and date of surgery.

This study was performed and reported in line with transparent reporting of a multivariable prediction model for individual prognosis or diagnosis (TRIPOD)-guidelines (eTable 1, TRIPOD-checklist).<sup>13</sup>

### *Data collection*

Data used for this study were extracted from (electronic) medical records of Radboudumc, Dutch Arthroplasty Register (LROI), and Radboudumc registry of complications. We primarily extracted comorbidities and medication use from medical records. These data were extracted based on coding and were obtained by three researchers (LS, TW and AT) by use of a standardized operating procedure, and stored in a centralized platform (Castor Electronic Data Capture (EDC)).<sup>14</sup> Data about patient characteristics like age, sex, BMI, smoking status, American Society of Anesthesiologists (ASA)-classification and diagnosis for surgery were extracted from LROI. Furthermore, date of surgery, type of surgery (primary or revision), surgery side, and type of implant were extracted.<sup>15</sup> From the register of complications we extracted all surgeries and complications which occurred within one year after THA or TKA.<sup>16</sup> In this registry, surgery related orthopedic complications were registered as well as other medical complications.<sup>17</sup> All complications were registered by location code combined with a code for the nature of the complication.<sup>16</sup> Some registrations were unclear and could refer to one of predefined complications and were therefore checked in medical records by LS. For all included location- and nature of complication codes per surgical complication, see eTable 2.

### *Inclusion and exclusion criteria*

Patients were eligible for inclusion in the cohort if the surgery concerned primary THA or TKA. We defined primary THA or TKA as the first time a total prosthesis is placed. Revision arthroplasty was defined as any change (replacement, removal, or addition) of one or several components of the joint

1  
2  
3 prosthesis.<sup>15</sup> We expected revision arthroplasty to influence risk for complications negatively, therefore  
4  
5 revision arthroplasty was excluded for this study.  
6  
7

#### 8 9 *Outcome* (dependent variables)

10 Prediction models were developed over the pooled THA and TKA data for six predefined surgical  
11 complications. Primary outcome was surgical site infection (SSI), and secondary outcomes included  
12 venous thromboembolism (VTE), postoperative bleeding (POB), luxation, delirium, and nerve damage  
13 (NER). All prediction models were developed based on primary THA and TKA data, except for the  
14 models for luxation and NER which were developed based on primary THA data. These surgical  
15 complications are uncommon in TKA.  
16  
17  
18  
19  
20  
21  
22  
23

#### 24 *Predictors* (independent variables)

25  
26 In total sixteen predictor candidates were selected based on evidence from previous reports and clinical  
27 reasoning in relation to the outcomes. These included patient characteristics, comorbidities, and  
28 medication use (as specified in eTable 3 and 4). Note that we made a purposive selection from the  
29 sixteen predictors candidates to serve as predictors for the different surgical complications.  
30  
31  
32

33 Comorbidities extracted from medical records were categorized according to the English National Health  
34 Service (NHS). The NHS considered these categories relevant comorbid categories in terms of outcome  
35 prediction.<sup>3</sup> Medication use was reduced to the active substance of the drug and was categorized to  
36 drug groups according the Dutch pharmacotherapeutic compass.<sup>18</sup>  
37  
38  
39  
40  
41  
42

#### 43 *Sample size*

44  
45 It is recommended that at least five events are collected for each predictor that is evaluated in  
46 multivariable regression analysis.<sup>19 20</sup> An event was defined as the least frequent outcome status, which  
47 in our case was the presence of surgical complication. In the Netherlands, the estimated risk of a  
48 complication like SSI is 3%<sup>21</sup>; therefore, in order to develop a model with six predictors, at least 30  
49 events were required, and so a sample size of at least 1000 patients was required.  
50  
51  
52  
53  
54  
55

#### 56 *Missing data*

1  
2  
3 Data were checked for completeness by investigating patterns of missingness to assess presence of a  
4 nonrandom element. Incomplete data were double-checked. Missing data were imputed using multiple  
5 imputation, as the omission of patients who have one or more predictor variables missing from analysis  
6  
7 can cause considerable loss of precision and might bias the results.<sup>22 23</sup> The number of imputations was  
8  
9 set to ten. The imputation was checked for accuracy by visual inspection and frequencies.  
10  
11  
12  
13

#### 14 *Statistical analysis methods*

##### 16 Model development

17  
18 Evidence from literature, clinical reasoning and eyeballing guided selection of predictors to be included  
19  
20 in the models. Eyeballing was done by evaluation of potential higher frequencies of predictors in relation  
21  
22 to the outcome.<sup>24</sup> All selected predictors were entered into a multivariable logistic regression model,  
23  
24 using the occurrence of a surgical complication as outcome variable. The prediction model was pooled  
25  
26 over the imputed datasets.<sup>25</sup>  
27  
28  
29

##### 30 Internal validation

31  
32 To reduce risk of over-fitting, we internally validated the model using bootstrapping. In this step, B-  
33  
34 bootstrap samples of B=1000 were drawn with replacement from original data, which reflects drawing  
35  
36 samples from underlying population. This was performed to estimate the performance in future patients,  
37  
38 and to adjust the model by the calculated shrinkage factor so that future predictions will be less  
39  
40 extreme.<sup>19</sup>  
41  
42

##### 43 Performance of the model

44  
45 We quantified measures of performance, discrimination and calibration. Overall model performance is  
46  
47 the distance between predicted- and actual outcome.<sup>23</sup> To quantify overall model performance, we  
48  
49 assessed Brier, Brier<sub>scaled</sub> and Nagelkerke's R<sup>2</sup>. For Brier, squared differences between actual outcome  
50  
51 and predictions were calculated. Brier can range from 0 for a perfect model to 0.25 for a non-informative  
52  
53 model with 50% incidence of the outcome. Brier<sub>scaled</sub> is scaled by its maximum under a non-informative  
54  
55 model and range between 0-100%. Nagelkerke's R<sup>2</sup> is a measure of explained variation.<sup>26</sup> The ability of  
56  
57 the model to discriminate between those with and without the outcome was quantified as the area under  
58  
59 the curve (AUC). This can range from 50% (no discriminative capacity) to 100% (perfect discriminative  
60

1  
2  
3 capacity). The discriminative capacity was interpreted as reasonable when AUC was  $>0.70$  and good  
4 when AUC was  $>0.80$ .<sup>27</sup> Calibration of the model is the agreement between predicted probabilities  
5 (probability of an event calculated with the model) and observed frequencies of outcome (accuracy) and  
6 was assessed by visually inspecting the calibration plot.<sup>23</sup> Furthermore, we computed Hosmer and  
7 Lemeshow (H-L) goodness-of-fit as a quantitative measure of calibration. A high H-L statistic is related  
8 to a low P-value, and indicates a poor fit.<sup>19</sup>

9  
10 All statistical analyses were performed using R 3.5.3. Packages `vim`, `mice`, `rms`, `pROC`, and  
11 `generalhoslem` were used.  
12  
13

### 14 *Patient and Public Involvement*

15 Patients were involved in the design of the study. Furthermore, patients were involved in the process of  
16 incorporating the prediction models in a patient decision aid.  
17  
18  
19  
20  
21  
22  
23  
24  
25  
26  
27  
28  
29  
30  
31  
32  
33  
34  
35  
36  
37  
38  
39  
40  
41  
42  
43  
44  
45  
46  
47  
48  
49  
50  
51  
52  
53  
54  
55  
56  
57  
58  
59  
60

## Results

### *Participants*

In total 3,776 patients with primary THA or TKA were identified as eligible for the present study. Of these patients, 2,494 patients underwent THA and 1,282 patients underwent TKA. See Figure 1 for participant flow. Baseline characteristics of the final cohort are presented in Table 1.

### *Model development*

The number of missing values per predictor are shown in Table 1. For the majority of potential predictors, there was only a small quantity of missing data; however, smoking status was missing in 24.7%. After imputation, all patients were available for multivariable modelling. There were no missing values in surgical complications.

### *Model specification*

According to our selection of predictor candidates per outcome (depicted in eTable 5), we entered all selected predictors in the model. For SSI, these predictors were: age, smoking status, BMI, presence of an immunological disorder, diabetes mellitus, liver disease, and use of Non-Steroidal Anti-Inflammatory Drugs (NSAID's). We found a significant influence of age, immunological disorder, diabetes mellitus and liver disease of which the presence of liver disease showed to be the strongest predictor with an odds ratio of 10.7 (95%-CI=2.4–46.6). The bootstrap yielded a shrinkage factor of 0.984, which was used to adjust the regression coefficients. Table 2 shows the adjusted prediction models and odds ratios that estimates the risk for SSI and secondary outcomes. For original prediction models and adjusted coefficients, see eTable 6.

### *Model performance*

Brier, Brier<sub>scaled</sub> and Nagelkerke's  $R^2$ , to assess overall performance of the model for SSI, were 0.010, 0.026 and 0.081 respectively.

The discriminative performance of the model for SSI is shown in Figure 2. The AUC was 71.9 (95%-CI=69.4–74.4%), which indicates reasonable discriminative ability. Predicted probabilities ranged between 0.01%–51.0%, with a mean of 1.0% (SD=1.5%). Calibration was poor, indicated by significant H-L statistic ( $p<0.001$ ). The corresponding calibration plot that represents the accuracy of the model is

1  
2  
3 shown in Figure 3. The calibration plot showed quite accurate prediction, especially when the risk is low.  
4  
5 The model underestimates the risk with a predicted probability >0.10.  
6  
7 The performance, discrimination and calibration of SSI and secondary outcomes are presented in Table  
8  
9 3. The predictive algorithms for POB and NER showed reasonable discriminative values (AUC=73.0  
10  
11 and 76.6) and explained fraction of variance by a Nagelkerke's  $R^2$  of 0.072 and 0.086 respectively. The  
12  
13 prediction model for delirium showed good discriminative value (AUC=85.9) and explained fraction of  
14  
15 variance of 0.193. The models for luxation and VTE showed least favorable results on discrimination  
16  
17 (AUC=58.4 and 66.3 respectively) and explained fraction of variance of 0.010 and 0.047 respectively.  
18  
19 The ROC curves and calibration plots for secondary outcomes are presented in eFigure 1.  
20  
21  
22  
23  
24  
25  
26  
27  
28  
29  
30  
31  
32  
33  
34  
35  
36  
37  
38  
39  
40  
41  
42  
43  
44  
45  
46  
47  
48  
49  
50  
51  
52  
53  
54  
55  
56  
57  
58  
59  
60

Table 1. Patient characteristics

| Patient characteristics           | Missing values | Total population<br>(n=3776) | Total hip replacement<br>(n=2494) | Total knee replacement<br>(n=1282) |
|-----------------------------------|----------------|------------------------------|-----------------------------------|------------------------------------|
| Age, mean (SD), years             | 0.1%           | 60.2 (15.8)                  | 57.7 (17.0)                       | 65.1 (11.7)                        |
| Gender: female No. (%)            | 0.1%           | 2298 (60.9%)                 | 1468 (58.9%)                      | 829 (64.7%)                        |
| BMI, mean (SD), kg/m <sup>2</sup> | 2.6%           | 27.5 (5.2)                   | 26.6 (4.7)                        | 29.3 (5.6)                         |
| Smoking: yes No. (%)              | 24.7%          | 498 (13.2)                   | 341 (13.7)                        | 157 (12.2)                         |
| ASA classification No. (%)        | 0.4%           |                              |                                   |                                    |
| I                                 |                | 839 (22.2)                   | 669 (26.8)                        | 170 (13.3)                         |
| II                                |                | 2091 (55.4)                  | 1314 (52.7)                       | 777 (60.6)                         |
| III                               |                | 829 (22.0)                   | 500 (20.0)                        | 329 (25.7)                         |
| Diagnosis hip No. (%)             | 0.4%           |                              |                                   |                                    |
| arthrosis                         |                |                              | 1599 (64.1)                       |                                    |
| rheumatoid arthritis              |                |                              | 68 (2.7)                          |                                    |
| dysplasia                         |                |                              | 241 (9.7)                         |                                    |
| osteonecrosis                     |                |                              | 228 (9.1)                         |                                    |
| other                             |                |                              | 349 (14.0)                        |                                    |
| Diagnosis knee No. (%)            | 0.9%           |                              |                                   |                                    |
| arthrosis                         |                |                              |                                   | 1037 (80.9)                        |
| rheumatoid arthritis              |                |                              |                                   | 123 (9.6)                          |
| other                             |                |                              |                                   | 111 (8.7)                          |
| Side affected: right No. (%)      | 0.3%           | 1915 (50.9)                  | 1257 (50.4)                       | 658 (51.3)                         |
| Surgical complications No. (%)    | 0%             |                              |                                   |                                    |
| surgical site infection           |                | 38 (1.0)                     | 25 (1.0)                          | 13 (1.0)                           |
| venous thromboembolism            |                | 26 (0.7)                     | 17 (0.7)                          | 9 (0.7)                            |
| postoperative bleeding            |                | 47 (1.2)                     | 28 (1.1)                          | 19 (1.5)                           |
| luxation                          |                | 32 (0.8)                     | 31 (1.2)                          | 1 (0.1)                            |

|              |  |          |          |         |
|--------------|--|----------|----------|---------|
| delirium     |  | 24 (0.6) | 20 (0.8) | 4 (0.3) |
| nerve damage |  | 24 (0.6) | 21 (0.8) | 3 (0.2) |

For peer review only



Table 2. Models including the coefficient per predictor per surgical outcome

| Variable                                   | Surgical site infection |                       | Venous thromboembolism |                      | Postoperative bleeding |                     | Luxation      |                     | Delirium      |                     | Nerve damage  |                     |
|--------------------------------------------|-------------------------|-----------------------|------------------------|----------------------|------------------------|---------------------|---------------|---------------------|---------------|---------------------|---------------|---------------------|
|                                            | Coefficient *           | Odds Ratio (95% CI)   | Coefficient *          | Odds Ratio (95% CI)  | Coefficient *          | Odds Ratio (95% CI) | Coefficient * | Odds Ratio (95% CI) | Coefficient * | Odds Ratio (95% CI) | Coefficient * | Odds Ratio (95% CI) |
| Intercept                                  | -7.272                  | -                     | -4.790                 | -                    | -7.172                 | -                   | -5.864        | -                   | -14.307       | -                   | -2.250        | -                   |
| Age (years)                                | 0.031                   | 1.032 (1.005-1.059)   | -0.008                 | 0.991 (0.966-1.018)  | 0.033                  | 1.034 (1.006-1.062) | 0.013         | 1.014 (0.991-1.038) | 0.127         | 1.137 (1.067-1.212) | -0.051        | 0.949 (0.926-0.974) |
| Gender (male/female)                       | -                       | -                     | -0.168                 | 0.844 (0.377-1.888)  | -                      | -                   | -             | -                   | -             | -                   | -0.254        | 0.772 (0.319-1.868) |
| BMI (kg/m <sup>2</sup> )                   | -0.002                  | 0.998 (0.937-1.063)   | -                      | -                    | 0.012                  | 1.012 (0.954-1.073) | 0.021         | 1.023 (0.951-1.099) | -             | -                   | -             | -                   |
| Obesity (yes/no)                           | -                       | -                     | 1.376                  | 4.040 (1.462-11.159) | -                      | -                   | -             | -                   | -             | -                   | -             | -                   |
| Smoking status (yes/no)                    | 0.757                   | 2.145 (0.883-5.213)   | -                      | -                    | -0.023                 | 0.952 (0.336-2.701) | 0.491         | 1.667 (0.651-4.268) | -             | -                   | 0.572         | 1.754 (0.510-6.029) |
| Lung disease (yes/no)                      | -                       | -                     | -                      | -                    | -                      | -                   | -             | -                   | -             | -                   | -             | -                   |
| Immunological disorder (yes/no)            | 0.891                   | 2.474 (1.186-5.158)   | -                      | -                    | -                      | -                   | -             | -                   | -             | -                   | -             | -                   |
| Rheumatoid arthritis (yes/no)              | -                       | -                     | -                      | -                    | -                      | -                   | 0.538         | 1.752 (0.408-7.530) | -             | -                   | -             | -                   |
| Diabetes mellitus (yes/no)                 | 0.904                   | 2.494 (1.125 - 5.529) | 0.829                  | 2.317 (0.870-6.173)  | -                      | -                   | -             | -                   | -             | -                   | -             | -                   |
| Liver disease (yes/no)                     | 2.345                   | 10.659 (2.441-46.555) | -                      | -                    | -                      | -                   | -             | -                   | -             | -                   | -             | -                   |
| Heart disease (yes/no)                     | -                       | -                     | -                      | -                    | 0.729                  | 2.086 (1.040-4.183) | -             | -                   | 0.348         | 1.422 (0.590-3.428) | -             | -                   |
| Disease of central nervous system (yes/no) | -                       | -                     | -                      | -                    | -                      | -                   | 0.106         | 1.113 (0.324-3.822) | 0.898         | 2.465 (0.936-6.490) | -             | -                   |
| Thromboembolic event (yes/no)              | -                       | -                     | 1.501                  | 4.586 (1.521-13.826) | -                      | -                   | -             | -                   | -             | -                   | -             | -                   |
| Dysplasia (yes/no)                         | -                       | -                     | -                      | -                    | -                      | -                   | -             | -                   | -             | -                   | -0.009        | 0.993               |

1  
2  
3  
4  
5  
6  
7  
8  
9  
10  
11  
12  
13  
14  
15  
16  
17  
18  
19  
20  
21  
22  
23  
24  
25  
26  
27  
28  
29  
30  
31  
32  
33  
34  
35  
36  
37  
38  
39  
40  
41  
42  
43  
44  
45  
46

|                                                                                                                                                                                                                                                                                                                                                                                                                                       |       |                     |   |   |       |                     |   |   |   |   |   |               |
|---------------------------------------------------------------------------------------------------------------------------------------------------------------------------------------------------------------------------------------------------------------------------------------------------------------------------------------------------------------------------------------------------------------------------------------|-------|---------------------|---|---|-------|---------------------|---|---|---|---|---|---------------|
|                                                                                                                                                                                                                                                                                                                                                                                                                                       |       |                     |   |   |       |                     |   |   |   |   |   | (0.217-4.552) |
| Vitamin K antagonist use (yes/no)                                                                                                                                                                                                                                                                                                                                                                                                     | -     | -                   | - | - | 0.787 | 2.220 (1.022-4.821) | - | - | - | - | - | -             |
| NSAID's (yes/no)                                                                                                                                                                                                                                                                                                                                                                                                                      | 0.619 | 1.877 (0.946-3.725) | - | - | -     | -                   | - | - | - | - | - | -             |
| <p>To calculate the absolute risk for the surgical complications: <math>P_{\text{(surgical complication)}} = 1 / (1 + \exp(-\text{linear part})) \times 100\%</math>. Linear part = intercept + (coefficients * variables).<br/>                 *adjustment for over-fitting by shrinkage factor (SF); the intercept was re-estimated.<br/>                 BMI: Body Mass Index, NSAID's: Non-Steroidal Anti-Inflammatory Drugs</p> |       |                     |   |   |       |                     |   |   |   |   |   |               |

For peer review only

Table 3. Model performance

|                             | Surgical site infection | Venous Thrombo-embolism | Post-operative bleeding | Luxation            | Delirium            | Nerve damage        |
|-----------------------------|-------------------------|-------------------------|-------------------------|---------------------|---------------------|---------------------|
| Brier score                 | 0.010                   | 0.007                   | 0.012                   | 0.012               | 0.006               | 0.008               |
| Brier <sub>scaled</sub>     | 0.026                   | 0.007                   | 0.010                   | 0.003               | 0.027               | 0.012               |
| Nagelkerke's R <sup>2</sup> | 0.081                   | 0.047                   | 0.072                   | 0.010               | 0.193               | 0.086               |
| AUC<br>(95%CI)              | 71.9<br>(69.4-74.4)     | 66.3<br>(62.7-69.9)     | 73.0<br>(70.7-75.4)     | 58.4<br>(55.0-61.8) | 85.9<br>(83.8-87.9) | 76.6<br>(73.2-80.0) |
| H-L statistic<br>(p-value)  | p < 0.001               | p < 0.001               | p < 0.001               | p < 0.001           | p < 0.001           | p < 0.001           |
| Predicted possibilities     |                         |                         |                         |                     |                     |                     |
| Mean                        | 0.010                   | 0.007                   | 0.012                   | 0.012               | <0.001              | 0.008               |
| SD                          | 0.015                   | 0.007                   | 0.012                   | 0.004               | 0.012               | 0.010               |
| Range                       | 0.001-0.510             | 0.003-0.147             | 0.001-0.090             | 0.005-0.045         | <0.001-0.147        | 0.001-0.072         |
| Shrinkage factor            | 0.984                   | 0.986                   | 0.989                   | 0.941               | 0.993               | 0.987               |

## Discussion

The prediction models developed in this study are aimed for personalized counselling and SDM in orthopedic outpatient clinics. With our models, risk for surgical site infection (SSI), venous thromboembolism (VTE), postoperative bleeding (POB), luxation, delirium, and nerve damage (NER) can be predicted by patient characteristics, comorbidities and medication use. For SSI, predicted probabilities range between 0.01%-51.0%, which makes the model useful in adding relevant personalized information for adequate SDM compared to the previously used population-based probability of risk of 3%.<sup>21</sup> However, it is important to state that the model showed moderately accurate prediction, especially when the risk is low. The model underestimates the risk with a predicted probability >10%. Therefore, predicted probabilities exceeding 10% should be interpreted with caution. Furthermore, other performance measures were moderate to reasonable, indicating moderate overall performance of the model for SSI. We found similar results for other outcomes, except for the model for luxation; this model seriously underestimates the risk for luxation and could therefore not be used for personalized counselling.

Our results are comparable with the results of a recent meta-analysis on impact of comorbidities on SSI in THA or TKA. The authors stated diabetes and liver disease to contribute to a higher risk for SSI.<sup>3</sup> Another study with similar discriminative capacity found BMI, use of immunosuppression, ASA-score, procedure duration, and prior surgeries as risk factors for SSI.<sup>28</sup> Some of these predictors did not contribute to a higher performance in our model and were therefore not included. We additionally found age to be a significant predictor for SSI.

Based on literature we expected use of thromboprophylaxis, such as platelet aggregation inhibitors, direct oral anticoagulants, low-molecular-weight heparin, and/or vitamin K antagonists to be important predictors for POB. However, we could not demonstrate this finding in our model.<sup>29</sup> This is perhaps due to low frequencies of these predictors in our participants with POB and due to improved preoperative care regarding anticoagulant therapy. Our model for delirium included comparable predictors as other studies; they showed that age and pre-existing cognitive impairment are important for delirium.<sup>30 31</sup> Our model confirms this finding. Kalisvaart et al., 2006 developed a comparable model based on acute- and elective hip-surgery patients and found comparable predictors. The authors additionally found acute admission as predictor for delirium.<sup>30</sup> We cannot confirm this in our model since we focused on primary

1  
2  
3 THA and TKA and these interventions are not primarily preferred in acute admissions due to hip fracture.  
4  
5 The AUC indicates that our model is more accurate in estimating the risk for delirium (85.9 vs. 73).<sup>30</sup>  
6  
7 For VTE we only found obesity and thromboembolic event as significant risk factors.<sup>3 32</sup> This can be  
8  
9 explained by the fact that the recurrence rate is high after earlier thromboembolic events.<sup>33</sup> Since we  
10  
11 aimed our models to support preoperative SDM, we only used patient-related variables as these  
12  
13 variables are considered modifiable.<sup>34 35</sup>  
14  
15

### 16 *Strengths and limitations*

17  
18 A strong point is that we thoroughly created a big dataset and we used state-of-the-art statistics for our  
19  
20 analyses. Furthermore, the simplicity of our models is a strength because we used predictors collected  
21  
22 in usual care. The predictors are easily to assess and thereby easily to implement in care. Several  
23  
24 limitations in this study should be noted. We retrospectively analyzed prospectively collected data.  
25  
26 These data were not primarily registered for research purposes and therefore their detail and accuracy  
27  
28 could be less than optimal. Moreover, changes in reporting systems took place during the studied period,  
29  
30 for instance the introduction of electronic medical records. It is known that changes in coding practice  
31  
32 may change completeness of data.<sup>36 37</sup> Although researchers performed data collection thoroughly, data  
33  
34 about comorbidities and medication use could be missed because it was reported elsewhere. Moreover,  
35  
36 we expect a small quantity of underreporting regarding comorbidities since physicians and  
37  
38 anesthesiologists perchance make a selection of important comorbidities in their report. We tried to  
39  
40 correct for this limitation by including medication use since all drugs are registered in preoperative  
41  
42 anesthesia-report. Also, data from 2004 until 2018 were used. In this period preoperative care has been  
43  
44 changed. To evaluate the effect of this change on our outcome, we checked our patterns of  
45  
46 complications and found no differences in this period. Furthermore, due to a low estimated event rate  
47  
48 (1-3%) we needed a large population to have enough events to include predictors into our models.  
49  
50 However, since not all predictors were significant in our final models, we expect that inclusion of more  
51  
52 predictors would not lead to a considerably different model. Another limitation is that we were not yet  
53  
54 able to determine external validity and clinical impact of the models.  
55

### 56 *Conclusion*

57  
58  
59  
60

1  
2  
3 Clinical prediction models were developed to contribute to more unbiased and accurate counselling in  
4 considering THA or TKA and are expected to be useful for identifying patients at risk for surgical  
5 complications. For SSI, the discriminative ability was reasonable and predicted risk varied between  
6 0.01%-51.0%. We expect the individual predicted risk to enhance SDM and support a well-founded  
7 choice. We consider our models for SSI, delirium, and NER appropriate for clinical use when taking  
8 under- and overestimation of predicted risk into account. For clinical use of the models VTE and POB,  
9 caution concerning overestimation exceeding predicted probability of 0.08 and 0.05 (data presented in  
10 calibration plots in eFigure 1), respectively, should be taken into account. Future studies should evaluate  
11 whether our models are feasible in an external population.  
12  
13  
14  
15  
16  
17  
18  
19  
20  
21

### 22 *Supplementary information*

23  
24 In the supplementary file, an excel file with the prediction models calculator is provided. The decision  
25 aid including the prediction models is published in Dutch at the website of the Radboud university  
26 medical center.  
27  
28  
29  
30

### 31 *Ethics Statement*

32  
33 Approval for this study was obtained at the Medical Ethical Committee of Radboudumc (2018-4880).  
34  
35  
36

### 37 *Funding statement*

38  
39 This work was supported by the Dutch National Health Care Institute [Transparency about the quality of  
40 care 2018: using outcome information for SDM]. Grant number: N/A. The funding source was not  
41 involved during the study.  
42  
43  
44  
45  
46

### 47 *Competing interests*

48  
49 P. Van der Wees participates in the Scientific Advisory Panel of the American Physical Therapy  
50 Association (APTA)  
51  
52  
53

### 54 *Acknowledgements*

55  
56 We thank Anouk Tulp for her contribution to the data collection. Furthermore we would like to  
57 acknowledge Stefan Riemens for offering help in reviewing the manuscript for grammar and wording.  
58  
59  
60

1  
2  
3  
4  
5 *Author's contribution*

6  
7 *Conceptualization* – Lieke Sweerts, Thomas Hoogeboom, Philip van der Wees, Sebastiaan van de  
8  
9 Groes

10  
11 *Data curation* – Lieke Sweerts

12  
13 *Formal analysis* – Lieke Sweerts, Thomas Hoogeboom, Thierry van Wessel, Sebastiaan van de Groes

14  
15 *Funding acquisition* – Sebastiaan van de Groes

16  
17 *Investigation* – Lieke Sweerts, Thierry van Wessel

18  
19 *Methodology* – Lieke Sweerts, Thomas Hoogeboom, Philip van der Wees, Sebastiaan van de Groes

20  
21 *Project administration* – Lieke Sweerts

22  
23 *Resources* – Lieke Sweerts, Thierry van Wessel

24  
25 *Software* –

26  
27 *Supervision* – Thomas Hoogeboom, Philip van der Wees, Sebastiaan van de Groes

28  
29 *Validation* – Lieke Sweerts

30  
31 *Visualization* – Lieke Sweerts, Thierry van Wessel

32  
33 *Writing – original draft* – Lieke Sweerts

34  
35 *Writing – review & editing* – Thomas Hoogeboom, Thierry van Wessel, Philip van der Wees,  
36  
37 Sebastiaan van de Groes

38  
39 *Data sharing statement*

40  
41 Raw data will not be shared by Dryad data repository. Data will be available upon request via the Data  
42  
43 repository from Radboudumc.  
44  
45  
46  
47  
48  
49  
50  
51  
52  
53  
54  
55  
56  
57  
58  
59  
60

## References

1. Smink AJ, van den Ende CHM, Vliet Vlieland TPM, et al. "Beating osteoARthritis": Development of a stepped care strategy to optimize utilization and timing of non-surgical treatment modalities for patients with hip or knee osteoarthritis. *Clinical Rheumatology* 2011;30(12):1623-29. doi: 10.1007/s10067-011-1835-x
2. Mota REM, Tarricone R, Ciani O, et al. Determinants of demand for total hip and knee arthroplasty: a systematic literature review. *BMC health services research* 2012;12:225-25. doi: 10.1186/1472-6963-12-225
3. Podmore B, Hutchings A, van der Meulen J, et al. Impact of comorbid conditions on outcomes of hip and knee replacement surgery: a systematic review and meta-analysis. *BMJ Open* 2018;8(7):e021784. doi: 10.1136/bmjopen-2018-021784 [published Online First: 2018/07/13]
4. Hawker GA, Badley EM, Borkhoff CM, et al. Which patients are most likely to benefit from total joint arthroplasty? *Arthritis Rheum* 2013;65(5):1243-52. doi: 10.1002/art.37901 [published Online First: 2013/03/06]
5. Ten Have IA, van den Bekerom MP, van Deurzen DF, et al. Role of decision aids in orthopaedic surgery. *World journal of orthopedics* 2015;6(11):864-66. doi: 10.5312/wjo.v6.i11.864
6. Chawla NV, Davis DA. Bringing big data to personalized healthcare: a patient-centered framework. *J Gen Intern Med* 2013;28 Suppl 3(Suppl 3):S660-S65. doi: 10.1007/s11606-013-2455-8
7. Riddle DL, Golladay GJ, Jiranek WA, et al. External Validation of a Prognostic Model for Predicting Nonresponse Following Knee Arthroplasty. *J Arthroplasty* 2017;32(4):1153-58.e1. doi: 10.1016/j.arth.2016.11.007 [published Online First: 2016/12/07]
8. Barlow T, Dunbar M, Sprowson A, et al. Development of an outcome prediction tool for patients considering a total knee replacement--the Knee Outcome Prediction Study (KOPS). *BMC musculoskeletal disorders* 2014;15:451. doi: 10.1186/1471-2474-15-451 [published Online First: 2014/12/30]
9. Lungu E, Desmeules F, Dionne CE, et al. Prediction of poor outcomes six months following total knee arthroplasty in patients awaiting surgery. *BMC musculoskeletal disorders* 2014;15:299. doi: 10.1186/1471-2474-15-299 [published Online First: 2014/09/10]
10. Tolk JJ, Waarsing JEH, Janssen RPA, et al. Development of Preoperative Prediction Models for Pain and Functional Outcome After Total Knee Arthroplasty Using The Dutch Arthroplasty



- 1  
2  
3 Register Data. *J Arthroplasty* 2019 doi: 10.1016/j.arth.2019.10.010 [published Online First:  
4 2019/11/13]  
5  
6  
7 11. Elwyn G. Idealistic, impractical, impossible? Shared decision making in the real world. *Br J Gen*  
8 *Pract* 2006;56(527):403-04.  
9  
10 12. Elwyn G, Edwards A, Hood K, et al. Achieving involvement: process outcomes from a cluster  
11 randomized trial of shared decision making skill development and use of risk communication  
12 aids in general practice. *Family Practice* 2004;21(4):337-46. doi: 10.1093/fampra/cmh401  
13  
14 13. Moons KG, Altman DG, Reitsma JB, et al. Transparent Reporting of a multivariable prediction model  
15 for Individual Prognosis or Diagnosis (TRIPOD): explanation and elaboration. *Ann Intern Med*  
16 2015;162(1):W1-73. doi: 10.7326/m14-0698 [published Online First: 2015/01/07]  
17  
18 14. Castor EDC. Castor Electronic Data Capture 2019 [27 Aug. 2019]. Available from:  
19 <https://castoredc.com> accessed August 28, 2019.  
20  
21 15. van Steenberg LN, Denissen GAW, Spooren A, et al. More than 95% completeness of reported  
22 procedures in the population-based Dutch Arthroplasty Register. *Acta orthopaedica*  
23 2015;86(4):498-505. doi: 10.3109/17453674.2015.1028307 [published Online First:  
24 2015/07/21]  
25  
26 16. de Waal Malefijt MC. An orthopedic complication-registration system. *Acta orthopaedica*  
27 *Scandinavica* 1995;66(1):84-9. [published Online First: 1995/02/01]  
28  
29 17. van der Wees PJ, Wammes JJ, Akkermans RP, et al. Patient-reported health outcomes after total  
30 hip and knee surgery in a Dutch University Hospital Setting: results of twenty years clinical  
31 registry. *BMC musculoskeletal disorders* 2017;18(1):97. doi: 10.1186/s12891-017-1455-y  
32 [published Online First: 2017/03/04]  
33  
34 18. ZorginstituutNederland. Farmacotherapeutisch Kompas. 2020 [Available from:  
35 <https://farmacotherapeutischkompas.nl2020>.  
36  
37 19. Peduzzi P, Concato J, Kemper E, et al. A simulation study of the number of events per variable in  
38 logistic regression analysis. *Journal of clinical epidemiology* 1996;49(12):1373-9. [published  
39 Online First: 1996/12/01]  
40  
41 20. Vittinghoff E, McCulloch CE. Relaxing the rule of ten events per variable in logistic and Cox  
42 regression. *Am J Epidemiol* 2007;165(6):710-8. doi: 10.1093/aje/kwk052 [published Online  
43 First: 2006/12/22]  
44  
45  
46  
47  
48  
49  
50  
51  
52  
53  
54  
55  
56  
57  
58  
59  
60

- 1
- 2
- 3 21. van Arkel E, van der Kraan J, Hageman M, et al. Consultkaart Artrose in de heup. 2016
- 4
- 5 22. Donders AR, van der Heijden GJ, Stijnen T, et al. Review: a gentle introduction to imputation of
- 6 missing values. *Journal of clinical epidemiology* 2006;59(10):1087-91. doi:
- 7 10.1016/j.jclinepi.2006.01.014 [published Online First: 2006/09/19]
- 8
- 9
- 10 23. Steyerberg EW. Clinical Prediction Models. New York: Springer 2009.
- 11
- 12 24. Salkind NJ. Encyclopedia of Measurement and Statistics. 2007 doi: 10.4135/9781412952644
- 13
- 14 25. RUBIN DB. Inference and missing data. *Biometrika* 1976;63(3):581-92. doi:
- 15 10.1093/biomet/63.3.581
- 16
- 17
- 18 26. Steyerberg EW, Vickers AJ, Cook NR, et al. Assessing the performance of prediction models: a
- 19 framework for traditional and novel measures. *Epidemiology* 2010;21(1):128-38. doi:
- 20 10.1097/EDE.0b013e3181c30fb2 [published Online First: 2009/12/17]
- 21
- 22
- 23 27. Hosmer DW, Lemeshow S, Sturdivant R. Applied Logistic Regression (3rd Edition). New York: Wiley
- 24 2013:528.
- 25
- 26
- 27 28. Berbari EF, Osmon DR, Lahr B, et al. The Mayo prosthetic joint infection risk score: implication for
- 28 surgical site infection reporting and risk stratification. *Infect Control Hosp Epidemiol*
- 29 2012;33(8):774-81. doi: 10.1086/666641 [published Online First: 2012/07/05]
- 30
- 31
- 32 29. Lindquist DE, Stewart DW, Brewster A, et al. Comparison of Postoperative Bleeding in Total Hip and
- 33 Knee Arthroplasty Patients Receiving Rivaroxaban, Enoxaparin, or Aspirin for
- 34 Thromboprophylaxis. *Clinical and Applied Thrombosis/Hemostasis* 2018;24(8):1315-21. doi:
- 35 10.1177/1076029618772337
- 36
- 37
- 38 30. Kalisvaart KJ, Vreeswijk R, De Jonghe JFM, et al. Risk Factors and Prediction of Postoperative
- 39 Delirium in Elderly Hip-Surgery Patients: Implementation and Validation of a Medical Risk Factor
- 40 Model. *Journal of the American Geriatrics Society* 2006;54(5):817-22. doi: 10.1111/j.1532-
- 41 5415.2006.00704.x
- 42
- 43
- 44 31. Lindroth H, Bratzke L, Purvis S, et al. Systematic review of prediction models for delirium in the older
- 45 adult inpatient. *BMJ Open* 2018;8(4):e019223. doi: 10.1136/bmjopen-2017-019223
- 46
- 47
- 48 32. Migita K, Bito S, Nakamura M, et al. Venous thromboembolism after total joint arthroplasty: results
- 49 from a Japanese multicenter cohort study. *Arthritis Res Ther* 2014;16(4):R154-R54. doi:
- 50 10.1186/ar4616
- 51
- 52
- 53
- 54
- 55
- 56
- 57
- 58
- 59
- 60

- 1  
2  
3 33. Hansson P-O, Sörbo J, Eriksson H. Recurrent Venous Thromboembolism After Deep Vein  
4 Thrombosis: Incidence and Risk Factors. *Archives of Internal Medicine* 2000;160(6):769-74.  
5 doi: 10.1001/archinte.160.6.769  
6  
7  
8  
9 34. Dargel J, Oppermann J, Brüggemann G-P, et al. Dislocation following total hip replacement. *Dtsch*  
10 *Arztebl Int* 2014;111(51-52):884-90. doi: 10.3238/arztebl.2014.0884  
11  
12  
13 35. Fessy MH, Putman S, Viste A, et al. What are the risk factors for dislocation in primary total hip  
14 arthroplasty? A multicenter case-control study of 128 unstable and 438 stable hips. *Orthop*  
15 *Traumatol Surg Res* 2017;103(5):663-68. doi: 10.1016/j.otsr.2017.05.014 [published Online  
16 First: 2017/06/21]  
17  
18  
19  
20 36. Schneeweiss S, Avorn J. A review of uses of health care utilization databases for epidemiologic  
21 research on therapeutics. *Journal of clinical epidemiology* 2005;58(4):323-37. doi:  
22 <https://doi.org/10.1016/j.jclinepi.2004.10.012>  
23  
24  
25  
26 37. Hemkens LG, Contopoulos-Ioannidis DG, Ioannidis JPA. Routinely collected data and comparative  
27 effectiveness evidence: promises and limitations. *CMAJ* 2016;188(8):E158-E64. doi:  
28 10.1503/cmaj.150653 [published Online First: 2016/02/16]  
29  
30  
31  
32  
33  
34  
35  
36  
37  
38  
39  
40  
41  
42  
43  
44  
45  
46  
47  
48  
49  
50  
51  
52  
53  
54  
55  
56  
57  
58  
59  
60

**Abbreviations used in manuscript**

1  
2  
3  
4  
5  
6  
7  
8  
9  
10  
11  
12  
13  
14  
15  
16  
17  
18  
19  
20  
21  
22  
23  
24  
25  
26  
27  
28  
29  
30  
31  
32  
33  
34  
35  
36  
37  
38  
39  
40  
41  
42  
43  
44  
45  
46  
47  
48  
49  
50  
51  
52  
53  
54  
55  
56  
57  
58  
59  
60

ASA: American Society of Anesthesiologists

AUC: Area under the receiver operating characteristic curve

H-L: Hosmer and Lemeshow

LROI: Dutch Arthroplasty Register

NER: Nerve damage

NHS: National Health Service

NOV: Dutch Orthopaedic Association

NSAID's: Non-Steroidal Anti-Inflammatory Drugs

POB: Postoperative bleeding

PROMs: Patient Reported Outcome Measures

SDM: Shared decision making

SSI: Surgical site infection

THA: Total hip arthroplasty

TKA: Total knee arthroplasty

VTE: Venous Thromboembolism

1  
2  
3 Figure 1. Flow chart for inclusion and exclusion of patients. Variables indicated with an asterisk\* were  
4 primarily extracted from the LROI database. When these data were missing, the data were extracted  
5 from the (electronic) medical record. Castor EDC is indicated by Castor  
6  
7  
8  
9  
10  
11  
12  
13  
14  
15  
16  
17  
18  
19  
20  
21  
22  
23  
24  
25  
26  
27  
28  
29  
30  
31  
32  
33  
34  
35  
36  
37  
38  
39  
40  
41  
42  
43  
44  
45  
46  
47  
48  
49  
50  
51  
52  
53  
54  
55  
56  
57  
58  
59  
60

For peer review only

1  
2  
3 Figure 2. Receiver Operating Characteristic curve of the prediction model for surgical site infection  
4

5 AUC=71.9 (95%-CI = 69.4–74.4%)  
6  
7  
8  
9  
10  
11  
12  
13  
14  
15  
16  
17  
18  
19  
20  
21  
22  
23  
24  
25  
26  
27  
28  
29  
30  
31  
32  
33  
34  
35  
36  
37  
38  
39  
40  
41  
42  
43  
44  
45  
46  
47  
48  
49  
50  
51  
52  
53  
54  
55  
56  
57  
58  
59  
60

For peer review only

1  
2  
3 Figure 3. Calibration plot with the actual probability against the predicted probability for the model for  
4 surgical site infection. The triangles indicate quantiles ( $g=10$ ) of patients with a similar predicted  
5 probability of success. The grey diagonal line represents perfect agreement between predicted and  
6  
7  
8  
9 actual probability  
10  
11  
12  
13  
14  
15  
16  
17  
18  
19  
20  
21  
22  
23  
24  
25  
26  
27  
28  
29  
30  
31  
32  
33  
34  
35  
36  
37  
38  
39  
40  
41  
42  
43  
44  
45  
46  
47  
48  
49  
50  
51  
52  
53  
54  
55  
56  
57  
58  
59  
60

For peer review only

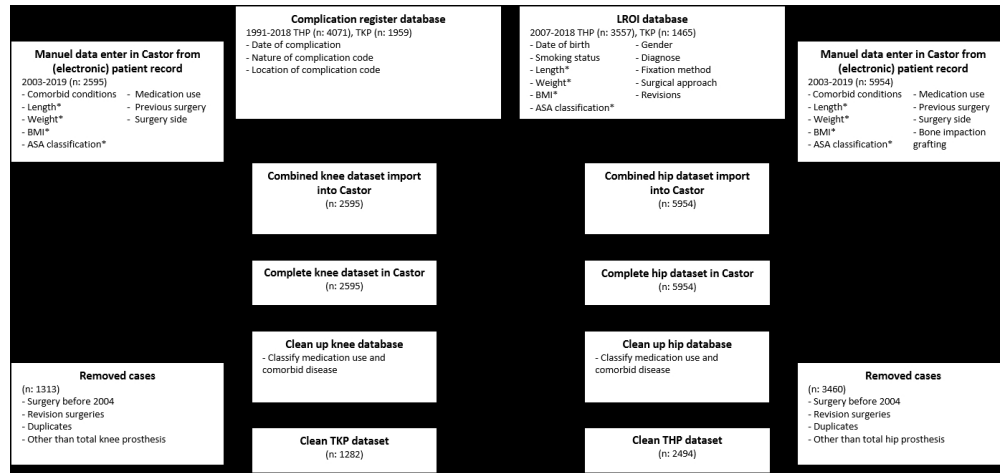

Figure 1. Flow chart for inclusion and exclusion of patients. Variables indicated with an asterisk\* were primarily extracted from the LROI database. When these data were missing, the data were extracted from the (electronic) medical record. Castor EDC is indicated by Castor

236x110mm (150 x 150 DPI)



1  
2  
3  
4  
5  
6  
7  
8  
9  
10  
11  
12  
13  
14  
15  
16  
17  
18  
19  
20  
21  
22  
23  
24  
25  
26  
27  
28  
29  
30  
31  
32  
33  
34  
35  
36  
37  
38  
39  
40  
41  
42  
43  
44  
45  
46  
47  
48  
49  
50  
51  
52  
53  
54  
55  
56  
57  
58  
59  
60

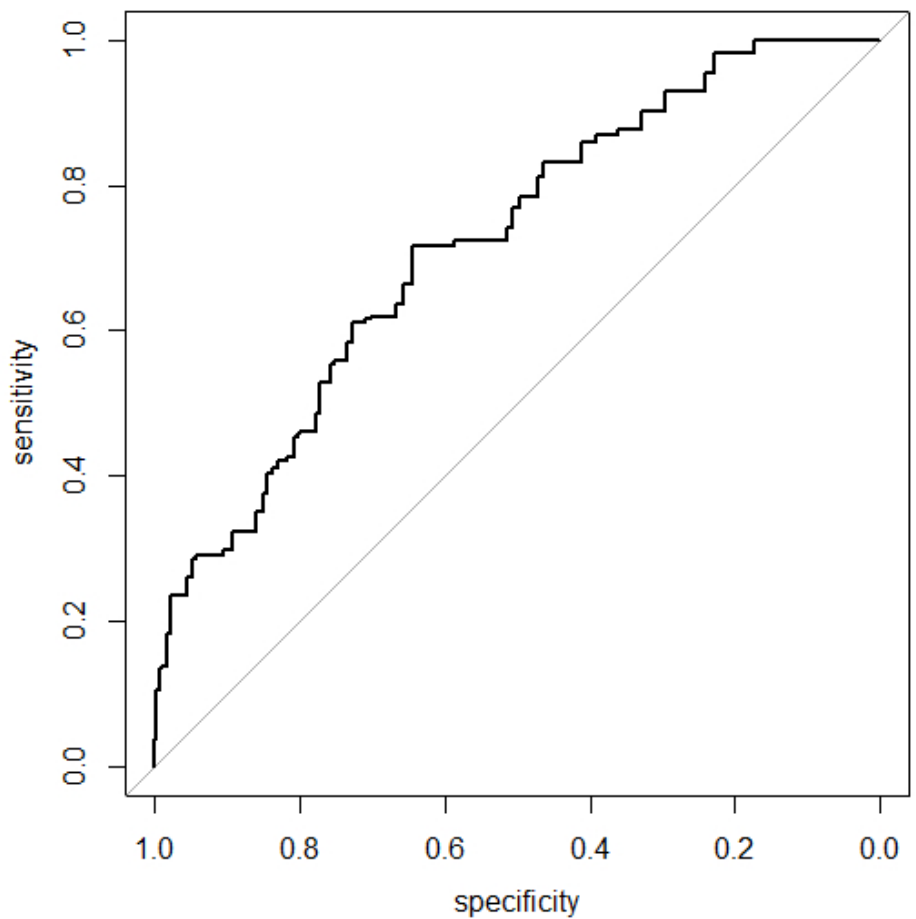

Figure 2. Receiver Operating Characteristic curve of the prediction model for surgical site infection  
AUC=71.9 (95%-CI = 69.4–74.4%)  
145x145mm (96 x 96 DPI)

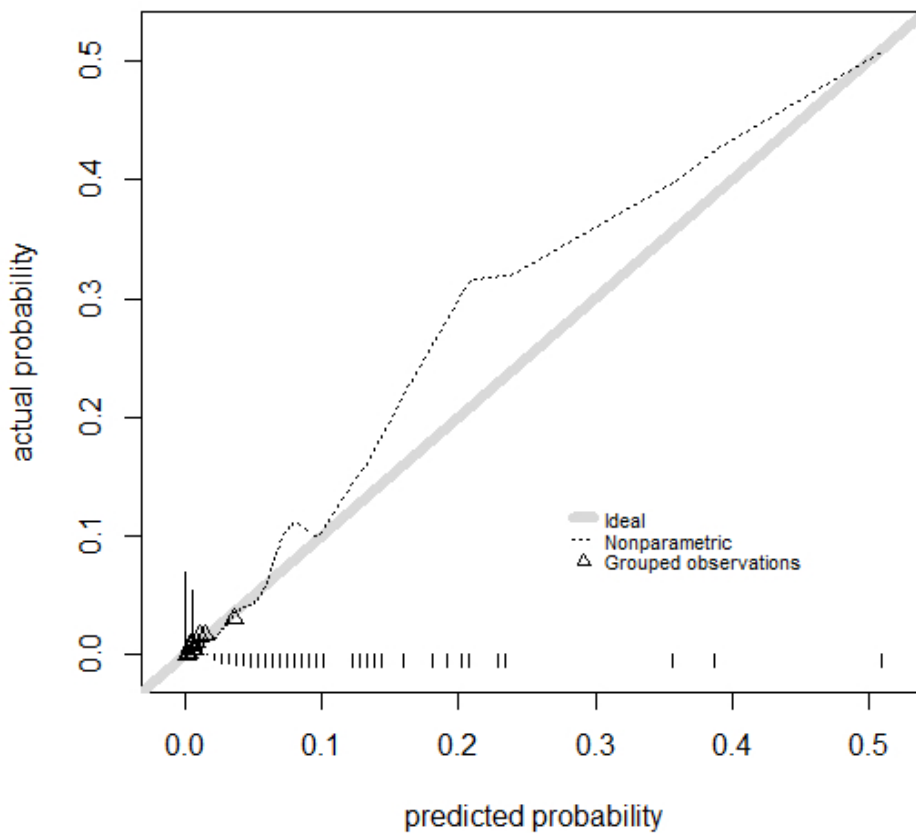

Figure 3. Calibration plot with the actual probability against the predicted probability for the model for surgical site infection. The triangles indicate quantiles (g=10) of patients with a similar predicted probability of success. The grey diagonal line represents perfect agreement between predicted and actual probability

145x145mm (96 x 96 DPI)

**Supplemental Material**

|                                                                         |    |
|-------------------------------------------------------------------------|----|
| eTable 1. TRIPOD Checklist: Prediction Model Development and Validation | 2  |
| eTable 2. Categorization of surgical complications                      | 5  |
| eTable 3. Predictors per outcome                                        | 7  |
| eTable 4. Categorization of comorbidities                               | 9  |
| eTable 5. Categorization of drug groups                                 | 12 |
| eTable 6. Original prediction models and adjusted coefficients          | 14 |
| eFigure 1. ROC curves and Calibration plots                             | 18 |
| References                                                              | 20 |

For peer review only

**eTable 1. TRIPOD Checklist: Prediction Model Development and Validation**

| Section/Topic             | Item |     | Checklist item                                                                                                                                                                                   | Page |
|---------------------------|------|-----|--------------------------------------------------------------------------------------------------------------------------------------------------------------------------------------------------|------|
| <b>Title and abstract</b> |      |     |                                                                                                                                                                                                  |      |
| Title                     | 1    | D;V | Identify the study as developing and/or validating a multivariable prediction model, the target population, and the outcome to be predicted.                                                     | 1    |
| Abstract                  | 2    | D;V | Provide a summary of objectives, study design, setting, participants, sample size, predictors, outcome, statistical analysis, results, and conclusions.                                          | 3    |
| <b>Introduction</b>       |      |     |                                                                                                                                                                                                  |      |
| Background and objectives | 3a   | D;V | Explain the medical context (including whether diagnostic or prognostic) and rationale for developing or validating the multivariable prediction model, including references to existing models. | 5    |
|                           | 3b   | D;V | Specify the objectives, including whether the study describes the development or validation of the model or both.                                                                                | 5    |
| <b>Methods</b>            |      |     |                                                                                                                                                                                                  |      |
| Source of data            | 4a   | D;V | Describe the study design or source of data (e.g., randomized trial, cohort, or registry data), separately for the development and validation data sets, if applicable.                          | 6    |
|                           | 4b   | D;V | Specify the key study dates, including start of accrual; end of accrual; and, if applicable, end of follow-up.                                                                                   | 6    |
| Participants              | 5a   | D;V | Specify key elements of the study setting (e.g., primary care, secondary care, general population) including number and location of centres.                                                     | 6    |
|                           | 5b   | D;V | Describe eligibility criteria for participants.                                                                                                                                                  | 6-7  |
|                           | 5c   | D;V | Give details of treatments received, if relevant.                                                                                                                                                | 6-7  |
| Outcome                   | 6a   | D;V | Clearly define the outcome that is predicted by the prediction model, including how and when assessed.                                                                                           | 7    |
|                           | 6b   | D;V | Report any actions to blind assessment of the outcome to be predicted.                                                                                                                           | N/A  |
| Predictors                | 7a   | D;V | Clearly define all predictors used in developing or validating the multivariable prediction model, including how and when they were measured.                                                    | 7    |
|                           | 7b   | D;V | Report any actions to blind assessment of predictors for the outcome and other predictors.                                                                                                       | N/A  |
| Sample size               | 8    | D;V | Explain how the study size was arrived at.                                                                                                                                                       | 7    |
| Missing data              | 9    | D;V | Describe how missing data were handled (e.g., complete-case analysis, single imputation, multiple imputation) with details of any imputation method.                                             | 7-8  |

|                              |     |     |                                                                                                                                                                                                       |                       |
|------------------------------|-----|-----|-------------------------------------------------------------------------------------------------------------------------------------------------------------------------------------------------------|-----------------------|
| Statistical analysis methods | 10a | D   | Describe how predictors were handled in the analyses.                                                                                                                                                 | 8-9                   |
|                              | 10b | D   | Specify type of model, all model-building procedures (including any predictor selection), and method for internal validation.                                                                         | 8-9                   |
|                              | 10c | V   | For validation, describe how the predictions were calculated.                                                                                                                                         | 8-9                   |
|                              | 10d | D;V | Specify all measures used to assess model performance and, if relevant, to compare multiple models.                                                                                                   | 8-9                   |
|                              | 10e | V   | Describe any model updating (e.g., recalibration) arising from the validation, if done.                                                                                                               | N/A                   |
| Risk groups                  | 11  | D;V | Provide details on how risk groups were created, if done.                                                                                                                                             | N/A                   |
| Development vs. validation   | 12  | V   | For validation, identify any differences from the development data in setting, eligibility criteria, outcome, and predictors.                                                                         | N/A                   |
| <b>Results</b>               |     |     |                                                                                                                                                                                                       |                       |
| Participants                 | 13a | D;V | Describe the flow of participants through the study, including the number of participants with and without the outcome and, if applicable, a summary of the follow-up time. A diagram may be helpful. | 10, Figure 1          |
|                              | 13b | D;V | Describe the characteristics of the participants (basic demographics, clinical features, available predictors), including the number of participants with missing data for predictors and outcome.    | 10, Table 1           |
|                              | 13c | V   | For validation, show a comparison with the development data of the distribution of important variables (demographics, predictors and outcome).                                                        | N/A                   |
| Model development            | 14a | D   | Specify the number of participants and outcome events in each analysis.                                                                                                                               | 10, Table 1           |
|                              | 14b | D   | If done, report the unadjusted association between each candidate predictor and outcome.                                                                                                              | eTable 6              |
| Model specification          | 15a | D   | Present the full prediction model to allow predictions for individuals (i.e., all regression coefficients, and model intercept or baseline survival at a given time point).                           | Table 2, eTable 6     |
|                              | 15b | D   | Explain how to use the prediction model.                                                                                                                                                              | Table 2, eTable 6, 11 |
| Model performance            | 16  | D;V | Report performance measures (with CIs) for the prediction model.                                                                                                                                      | Table 2, eTable 6     |
| Model-updating               | 17  | V   | If done, report the results from any model updating (i.e., model specification, model performance).                                                                                                   | N/A                   |
| <b>Discussion</b>            |     |     |                                                                                                                                                                                                       |                       |

|                           |     |     |                                                                                                                                                |       |
|---------------------------|-----|-----|------------------------------------------------------------------------------------------------------------------------------------------------|-------|
| Limitations               | 18  | D;V | Discuss any limitations of the study (such as nonrepresentative sample, few events per predictor, missing data).                               | 17-19 |
| Interpretation            | 19a | V   | For validation, discuss the results with reference to performance in the development data, and any other validation data.                      | 17-19 |
|                           | 19b | D;V | Give an overall interpretation of the results, considering objectives, limitations, results from similar studies, and other relevant evidence. | 17-19 |
| Implications              | 20  | D;V | Discuss the potential clinical use of the model and implications for future research.                                                          | 17-19 |
| <b>Other information</b>  |     |     |                                                                                                                                                |       |
| Supplementary information | 21  | D;V | Provide information about the availability of supplementary resources, such as study protocol, Web calculator, and data sets.                  | 19-20 |
| Funding                   | 22  | D;V | Give the source of funding and the role of the funders for the present study.                                                                  | 19    |

\*Items relevant only to the development of a prediction model are denoted by D, items relating solely to a validation of a prediction model are denoted by V, and items relating to both are denoted D;V. We recommend using the TRIPOD Checklist in conjunction with the TRIPOD Explanation and Elaboration document.

**eTable 2. Categorization of surgical complications**

| <b>Surgical site infection*</b> |                        |                               |                              |
|---------------------------------|------------------------|-------------------------------|------------------------------|
| Location code**                 | Location**             | Code nature of complication** | Nature of complication**     |
| 24                              | Pelvis                 | 012                           | Prosthesis infection         |
| 40                              | Hip                    | 083                           | Deep infection               |
| 42                              | Knee                   | 134                           | Infected organ               |
| <b>Venous thromboembolism</b>   |                        |                               |                              |
| 24                              | Pelvis                 | 104                           | Thrombosis                   |
| 40                              | Hip                    | 105                           | Embolus                      |
| 41                              | Femur/upper leg        |                               |                              |
| 42                              | Knee                   |                               |                              |
| 43                              | Lower leg              |                               |                              |
| 50                              | Lung                   |                               |                              |
| 56                              | Venous system          |                               |                              |
| <b>Luxation</b>                 |                        |                               |                              |
| 40                              | Hip                    | 041                           | Luxation                     |
|                                 |                        | 086                           | Disconnection prosthesis     |
| <b>Delirium</b>                 |                        |                               |                              |
| 54                              | Central nervous system | 141                           | Psychological decompensation |
| 58                              | Total                  |                               |                              |
| <b>Nerve damage</b>             |                        |                               |                              |
| 40                              | Hip                    | 094                           | Nerve lesion                 |
| 41                              | Femur/upper leg        |                               |                              |
| 43                              | Lower leg              |                               |                              |
| 57                              | Arterial system        |                               |                              |
| <b>Postoperative bleeding</b>   |                        |                               |                              |
| 40                              | Hip                    | 014                           | Wound leakage                |
| 41                              | Femur/upper leg        | 022                           | Bleeding                     |

|    |               |     |                   |
|----|---------------|-----|-------------------|
| 42 | Knee          | 100 | Secondary         |
| 56 | Venous system | 136 | bleeding/hematoma |
|    |               |     | Bleeding organ    |

\* the records registered with the nature of complication 010 (infection around sutures), 011 (superficial infection), 013 (local wound necrosis) and 014 (wound leakage) are checked for occurrence of surgical site infection and added to the outcome surgical site infection when this was the case.

\*\* only depicted when location code or code of the nature of complication occurred in the register.

Furthermore records registered with nature of complication 125 (interruption of sterility) were checked for occurrence of a surgical complication.



**eTable 3. Predictors per outcome**

|                                     | OR*/RR** (95% CI)  | Study                      |
|-------------------------------------|--------------------|----------------------------|
| <b>Surgical site infection</b>      |                    |                            |
| Age                                 |                    |                            |
| <i>THA (&gt;70years)</i>            | 0.7** (0.3-1.5)    | Almustafa et al (2018) (1) |
| <i>TKA (&gt;70years)</i>            | 1.7** (0.9-3.3)    | Almustafa et al (2018) (1) |
| Smoking status                      | 0.16** (0.05-0.52) | Møller et al (2002) (2)    |
| BMI                                 | 6.7* (NR)          | Namba et al (2005) (3)     |
|                                     | 4.8** (1.9-12.0)   | Almustafa et al (2018) (1) |
|                                     | 2.53* (1.25-5.13)  | Chen et al (2013) (4)      |
| Immunological disorder              | -                  | <i>Clinical reasoning</i>  |
| NSAID's                             | -                  | <i>Clinical reasoning</i>  |
| Diabetes mellitus                   | 1.90* (1.32-2.74)  | Podmore et al (2018) (5)   |
| Liver disease                       | 2.46* (1.46-4.12)  | Podmore et al (2018) (5)   |
| <b>Venous thromboembolism</b>       |                    |                            |
| Age                                 |                    |                            |
| <i>THA(≥75years)</i>                | 1.82* (1.15-2.87)  | Migita et al (2014) (6)    |
| <i>TKA(≥75years)</i>                | 1.30* (0.99-1.71)  | Migita et al (2014) (6)    |
| Sex                                 |                    |                            |
| <i>THA(female&gt;risk)</i>          | 2.31* (1.03-5.18)  | Migita et al (2014) (6)    |
| <i>TKA(female&gt;risk)</i>          | 1.58* (1.08-2.31)  | Migita et al (2014) (6)    |
| Diabetes mellitus                   | 1.26* (0.92-1.72)  | Podmore et al (2018) (5)   |
| <i>(TKA)</i>                        | 1.36* (1.07-1.72)  | Yang et al (2015) (7)      |
| Thromboembolic event ( <i>TKA</i> ) | 1.11* (0.36-3.46)  | Migita et al (2014) (6)    |
| Obesity                             |                    |                            |
| <i>THA(BMI&gt;30)</i>               | 0.89* (0.36-2.20)  | Migita et al (2014) (6)    |
| <i>TKA(BMI&gt;30)</i>               | 0.90* (0.58-1.38)  | Migita et al (2014) (6)    |
| <b>Postoperative bleeding</b>       |                    |                            |
| Age                                 |                    |                            |
| <i>THA(&gt;70 years)</i>            | 2.61** (1.50-4.53) | Quintero et al (2016) (8)  |

|                                                                               |                    |                            |
|-------------------------------------------------------------------------------|--------------------|----------------------------|
| TKA(>70years)                                                                 | 2.25** (1.03-4.94) | Quintero et al (2016) (8)  |
| BMI                                                                           | -                  | <i>Clinical reasoning</i>  |
| Heart disease                                                                 | -                  | <i>Univariate analysis</i> |
| Vitamin K antagonists                                                         | -                  | <i>Clinical reasoning</i>  |
| Smoking status                                                                | -                  | <i>Univariate analysis</i> |
| Luxation                                                                      |                    |                            |
| Age                                                                           | 1.27* (1.02-1.57)  | Kunutsor et al (2019) (9)  |
| Smoking status                                                                | 1.08* (0.96-1.21)  | Kunutsor et al (2019) (9)  |
| BMI                                                                           | 1.38* (1.03-1.85)  | Kunutsor et al (2019) (9)  |
| Rheumatoid arthritis                                                          | 1.50* (1.05-2.15)  | Kunutsor et al (2019) (9)  |
| Disease of the central nervous system                                         | 2.54* (1.86-3.48)  | Kunutsor et al (2019) (9)  |
| Delirium                                                                      |                    |                            |
| Age                                                                           | 2.20* (1.80-2.71)  | Huang et al (2019) (10)    |
| Disease of the central nervous system ( <i>dementia</i> )                     | 7.44* (3.54-14.60) | Huang et al (2019) (10)    |
| Heart disease ( <i>congestive</i> )                                           | 0.83* (0.39-1.61)  | Huang et al (2019) (10)    |
| Nerve damage                                                                  |                    |                            |
| Age (<45 vs 65-74)                                                            | 7.17* (1.17-44.00) | Shetty et al (2016) (11)   |
| BMI (<BMI >risk)                                                              | 0.96* (0.77-1.21)  | Kawano et al (2018) (12)   |
| Sex ( <i>female &gt; risk</i> )                                               | Not reported       | Shetty et al (2016) (11)   |
| Smoking status                                                                | 1.90* (1.06-3.38)  | Shetty et al (2016) (11)   |
| Dysplasia                                                                     | 3.69* (1.65-8.28)  | Farrell et al (2005) (13)  |
| *results reported as odds ratio (OR); ** results reported as risk ratio (RR). |                    |                            |

eTable 4. Categorization of comorbidities

| Categorization of comorbidities |                                                                                                                                                                                                                                                                                    |
|---------------------------------|------------------------------------------------------------------------------------------------------------------------------------------------------------------------------------------------------------------------------------------------------------------------------------|
| Comorbid category*              | Included comorbid conditions**                                                                                                                                                                                                                                                     |
| Bleeding diseases               | Hemophilia                                                                                                                                                                                                                                                                         |
| Blood quality                   | Anemia                                                                                                                                                                                                                                                                             |
| Cancer                          | Prostate cancer<br>Leukemia<br>Breast cancer<br>Lymph node cancer<br>Bowen's disease                                                                                                                                                                                               |
| Central nervous system          | Parkinson's disease<br>Dementia<br>TIA<br>CVA                                                                                                                                                                                                                                      |
| Cognitive impairment            | Down syndrome                                                                                                                                                                                                                                                                      |
| Diabetes mellitus               | Diabetes mellitus                                                                                                                                                                                                                                                                  |
| Heart disease                   | Ischemia of the heart<br>Valve damage blood regurgitation<br>Valve damage reduced blood flow<br>Valve replacement<br>Cardiomyopathy decreased contraction<br>Cardiomyopathy decreased relaxation<br>Heart decompensation<br>Heart attack<br>Angina pectoris<br>Atrial fibrillation |
| High blood pressure             | Hypertension                                                                                                                                                                                                                                                                       |
| Hyper hormonal                  | Hyper hormonal                                                                                                                                                                                                                                                                     |
| Hypo hormonal                   | Hypo hormonal                                                                                                                                                                                                                                                                      |

|                            |                                                                                                                                                      |
|----------------------------|------------------------------------------------------------------------------------------------------------------------------------------------------|
| Immunological disorder     | Scleroderma<br>Rheumatoid arthritis<br>Gout<br>Psoriasis<br>Artritides<br>Dermal barrier disease<br>General immune disorder<br>Organ transplantation |
| Inflammation               | Chronic bladder infection                                                                                                                            |
| Kidney disease             | Kidney insufficiency                                                                                                                                 |
| Liver disease              | Liver cirrhosis                                                                                                                                      |
| Lung disease               | Chronic bronchitis<br>Asthma<br>COPD<br>Emphysema<br>Dyspnea                                                                                         |
| Mood sickness              | Depression<br>Psychosis                                                                                                                              |
| Obesity                    | Obesity                                                                                                                                              |
| Peripheral nervous system  | Nerve compression<br>Lumbar vertebral stenosis                                                                                                       |
| Poor peripheral blood flow | Atherosclerosis<br>Claudication intermittent                                                                                                         |
| Thromboembolic event       | Deep venous thromboembolism<br>Pulmonary embolism                                                                                                    |

\* the comorbid categories are used for analysis.

1  
2  
3 \*\* comorbid conditions are depicted when the frequency was  $\geq 10$  or when the  
4  
5 comorbid condition was considered as a relevant comorbid condition in terms of  
6  
7 outcome prediction.  
8  
9  
10  
11  
12  
13  
14  
15  
16  
17  
18  
19  
20  
21  
22  
23  
24  
25  
26  
27  
28  
29  
30  
31  
32  
33  
34  
35  
36  
37  
38  
39  
40  
41  
42  
43  
44  
45  
46  
47  
48  
49  
50  
51  
52  
53  
54  
55  
56  
57  
58  
59  
60

For peer review only

**eTable 5. Categorization of drug groups**

| <b>Categorization of medication use</b> |                                                                                    |
|-----------------------------------------|------------------------------------------------------------------------------------|
| <b>Drug category</b>                    | <b>Drugs groups according to the Dutch pharmacotherapeutic compass (14)</b>        |
| Acenocoumarol                           | Acenocoumarol*                                                                     |
| Antifibrinolytica                       | Antifibrinolytica                                                                  |
| Antimycotics                            | Antimycotic antibiotics<br>Others                                                  |
| Antiretroviral agents                   | Antiretroviral agents                                                              |
| Bisfosfonates                           | Bisfosfonates                                                                      |
| Colchicine group                        | Colchicine group                                                                   |
| Directly working oral anticoagulants    | Directly working oral anticoagulants                                               |
| DMARD's biologicals                     | Immunosuppressives selective<br>Immunosuppressives others                          |
| Factors in blood coagulance             | Factors in blood coagulance                                                        |
| Fenprocoumon                            | Fenprocoumon*                                                                      |
| Imidazoles                              | Cutane imidazoles<br>Others                                                        |
| Immunosuppressives                      | Interferons<br>Interleukin antagonists<br>Monoclonal antibodies                    |
| Local antibacterial agents              | Cutaneous<br>antibacterial agents<br>Ocular antibacterial agents                   |
| Local corticosteroids                   | Cutane corticosteroids<br>Nasal corticosteroids<br>Corticosteroides for inhalation |
| Low molecular weight heparins           | Low molecular weight heparins                                                      |
| Methotrexate                            | Methotrexate                                                                       |

|                                 |                                                                                                                                                                                                                                           |
|---------------------------------|-------------------------------------------------------------------------------------------------------------------------------------------------------------------------------------------------------------------------------------------|
| NSAID's**                       | Coxib's<br>Others                                                                                                                                                                                                                         |
| Oncology related detoxificants  | Oncology related detoxificants                                                                                                                                                                                                            |
| Salicylates                     | Analgetic salicylates<br>Trombocytic salicylates                                                                                                                                                                                          |
| Statins                         | Statins                                                                                                                                                                                                                                   |
| Systemic antibacterial agents   | Cephalosporins<br>Macrolides<br>Penicillin's<br>Tetracyclines<br>Carbapenems<br>Ceftriaxone<br>Glycopeptides<br>Aminoglycosides<br>Rifamycins tuberculose<br>Sulfonamides and trimethoprimides<br>Triazoles<br>Fluoroquinolones<br>Others |
| Thrombocyte-aggregationblockers | P2y12 blockers<br>Others                                                                                                                                                                                                                  |
| Xanthineoxidase inhibitor       | Xanthineoxidase inhibitor                                                                                                                                                                                                                 |

\* according the Dutch pharmacotherapeutic compass, acenocoumarol and fenprocoumon belong to the drug group 'vitamin k antagonists'. Based on expert opinion, acenocoumarol and fenprocoumon were included separately in the analysis because of the differences in half-life.

\*\* Non-Steroidal Anti-Inflammatory Drugs

**eTable 6. Original prediction models and adjusted coefficients**

## Prediction model for estimation of risk for surgical site infection

| Variable                                                                                                                                                                                                                                                                                                                                                                                                                                                                                                                                                                     | Regression coefficient | Regression coefficient<br>(adjusted with SF)* | Odds Ratio<br>(95% CI)   |
|------------------------------------------------------------------------------------------------------------------------------------------------------------------------------------------------------------------------------------------------------------------------------------------------------------------------------------------------------------------------------------------------------------------------------------------------------------------------------------------------------------------------------------------------------------------------------|------------------------|-----------------------------------------------|--------------------------|
| Intercept                                                                                                                                                                                                                                                                                                                                                                                                                                                                                                                                                                    | -7.305                 | -7.272                                        | -                        |
| Age (years)                                                                                                                                                                                                                                                                                                                                                                                                                                                                                                                                                                  | 0.031                  | 0.031                                         | 1.032<br>(1.005-1.059)   |
| BMI (kg/m <sup>2</sup> )                                                                                                                                                                                                                                                                                                                                                                                                                                                                                                                                                     | -0.002                 | -0.002                                        | 0.998<br>(0.937-1.063)   |
| Smoking status (yes/no)                                                                                                                                                                                                                                                                                                                                                                                                                                                                                                                                                      | 0.769                  | 0.757                                         | 2.145<br>(0.883-5.213)   |
| Immunological disorder<br>(yes/no)                                                                                                                                                                                                                                                                                                                                                                                                                                                                                                                                           | 0.905                  | 0.891                                         | 2.474<br>(1.186-5.158)   |
| Diabetes mellitus (yes/no)                                                                                                                                                                                                                                                                                                                                                                                                                                                                                                                                                   | 0.918                  | 0.904                                         | 2.494<br>(1.125-5.529)   |
| Liver disease (yes/no)                                                                                                                                                                                                                                                                                                                                                                                                                                                                                                                                                       | 2.382                  | 2.345                                         | 10.659<br>(2.441-46.555) |
| NSAID's (yes/no)                                                                                                                                                                                                                                                                                                                                                                                                                                                                                                                                                             | 0.629                  | 0.619                                         | 1.877<br>(0.946-3.725)   |
| <p>To calculate the absolute risk of surgical site infection: <math>P_{(\text{surgical site infection})} = 1 / (1 + e^{-\text{linear part}}) \times 100\%</math>;</p> <p>Linear part = <math>-7.272 + (0.031 \times \text{age} - 0.002 \times \text{BMI} + 0.757 \times \text{smoking status} + 0.891 \times \text{immunological disorder} + 0.904 \times \text{diabetes mellitus} + 2.345 \times \text{liver disease} + 0.619 \times \text{NSAID's})</math>.</p> <p>*adjustment for over-fitting by shrinkage factor (SF) (SF = 0.984); the intercept was re-estimated.</p> |                        |                                               |                          |

## Prediction model for estimation of risk for venous thromboembolism

| Variable    | Regression coefficient | Regression coefficient<br>(adjusted with SF)* | Odds Ratio<br>(95% CI) |
|-------------|------------------------|-----------------------------------------------|------------------------|
| Intercept   | -4.764                 | -4.790                                        | -                      |
| Age (years) | -0.009                 | -0.008                                        | 0.991                  |



|                                                                                                                                                                                                                                                                                                                                                    |        |        |                         |
|----------------------------------------------------------------------------------------------------------------------------------------------------------------------------------------------------------------------------------------------------------------------------------------------------------------------------------------------------|--------|--------|-------------------------|
|                                                                                                                                                                                                                                                                                                                                                    |        |        | (0.966-1.018)           |
| Gender (male/female)                                                                                                                                                                                                                                                                                                                               | -0.170 | -0.168 | 0.844<br>(0.377-1.888)  |
| Obesity (yes/no)                                                                                                                                                                                                                                                                                                                                   | 1.396  | 1.376  | 4.040<br>(1.462-11.159) |
| Diabetes mellitus (yes/no)                                                                                                                                                                                                                                                                                                                         | 0.841  | 0.829  | 2.317<br>(0.870-6.173)  |
| Thromboembolic event<br>(yes/no)                                                                                                                                                                                                                                                                                                                   | 1.523  | 1.501  | 4.586<br>(1.521-13.826) |
| To calculate the absolute risk of venous thromboembolism: $P_{(\text{venous thromboembolism})} = 1/(1+e^{-\text{linear part}}) \times 100\%$ ; Linear part = $-4.790 + (-0.008 \times \text{age} - 0.168 \times \text{gender} + 1.376 \times \text{obesity} + 0.829 \times \text{diabetes mellitus} + 1.501 \times \text{thromboembolic event})$ . |        |        |                         |
| *adjustment for over-fitting by shrinkage factor (SF) (SF = 0.986); the intercept was re-estimated.                                                                                                                                                                                                                                                |        |        |                         |

#### Prediction model for estimation of risk for postoperative bleeding.

| Variable                                                                                                                                       | Regression coefficient | Regression coefficient<br>(adjusted with SF)* | Odds Ratio<br>(95% CI) |
|------------------------------------------------------------------------------------------------------------------------------------------------|------------------------|-----------------------------------------------|------------------------|
| Intercept                                                                                                                                      | -7.182                 | -7.172                                        | -                      |
| Age (years)                                                                                                                                    | 0.033                  | 0.033                                         | 1.034<br>(1.006-1.062) |
| BMI (kg/m <sup>2</sup> )                                                                                                                       | 0.012                  | 0.012                                         | 1.012<br>(0.954-1.073) |
| Smoking status (yes/no)                                                                                                                        | -0.023                 | -0.023                                        | 0.952<br>(0.336-2.701) |
| Heart disease (yes/no)                                                                                                                         | 0.737                  | 0.729                                         | 2.086<br>(1.040-4.183) |
| Vitamin K antagonist use<br>(yes/no)                                                                                                           | 0.796                  | 0.787                                         | 2.220<br>(1.022-4.821) |
| To calculate the absolute risk of postoperative bleeding: $P_{(\text{postoperative bleeding})} = 1/(1+e^{-\text{linear part}}) \times 100\%$ ; |                        |                                               |                        |

Linear part =  $-7.172 + (0.033 \times \text{age} + 0.012 \times \text{BMI} - 0.023 \times \text{smoking status} + 0.729 \times \text{heart disease} + 0.787 \times \text{vitamin K antagonist use})$ .

\*adjustment for over-fitting by shrinkage factor (SF) (SF = 0.989); the intercept was re-estimated.

#### Prediction model for estimation of risk for luxation.

| Variable                                      | Regression coefficient | Regression coefficient<br>(adjusted with SF)* | Odds Ratio<br>(95% CI) |
|-----------------------------------------------|------------------------|-----------------------------------------------|------------------------|
| Intercept                                     | -5.976                 | -5.800                                        | -                      |
| Age (years)                                   | 0.014                  | 0.013                                         | 1.014<br>(0.991-1.038) |
| BMI (kg/m <sup>2</sup> )                      | 0.022                  | 0.021                                         | 1.023<br>(0.951-1.099) |
| Smoking status (yes/no)                       | 0.521                  | 0.491                                         | 1.667<br>(0.651-4.268) |
| Rheumatoid arthritis<br>(yes/no)              | 0.572                  | 0.538                                         | 1.752<br>(0.408-7.530) |
| Disease of central nervous<br>system (yes/no) | 0.113                  | 0.106                                         | 1.113<br>(0.324-3.822) |

To calculate the absolute risk of luxation:  $P_{(\text{luxation})} = 1 / (1 + e^{-\text{linear part}}) \times 100\%$ ;

Linear part =  $-5.800 + (0.013 \times \text{age} + 0.021 \times \text{BMI} + 0.491 \times \text{smoking status} + 0.538 \times \text{rheumatoid arthritis} + 0.106 \times \text{disease of central nervous system})$ .

\*adjustment for over-fitting by shrinkage factor (SF) (SF = 0.941); the intercept was re-estimated.

#### Prediction model for estimation of risk for delirium.

| Variable               | Regression coefficient | Regression coefficient<br>(adjusted with SF)* | Odds Ratio<br>(95% CI) |
|------------------------|------------------------|-----------------------------------------------|------------------------|
| Intercept              | -14.368                | -14.307                                       | -                      |
| Age (years)            | 0.129                  | 0.127                                         | 1.137<br>(1.067-1.212) |
| Heart disease (yes/no) | 0.351                  | 0.348                                         | 1.422                  |

|                                                                                                                                                                                                                                                                                                                                                                                                                   |       |       |                        |
|-------------------------------------------------------------------------------------------------------------------------------------------------------------------------------------------------------------------------------------------------------------------------------------------------------------------------------------------------------------------------------------------------------------------|-------|-------|------------------------|
|                                                                                                                                                                                                                                                                                                                                                                                                                   |       |       | (0.590-3.428)          |
| Disease of central nervous system (yes/no)                                                                                                                                                                                                                                                                                                                                                                        | 0.904 | 0.898 | 2.465<br>(0.936-6.490) |
| <p>To calculate the absolute risk of delirium: <math>P_{(\text{delirium})} = 1/(1+e^{-\text{linear part}}) \times 100\%</math>;</p> <p>Linear part = <math>-14.307 + (0.127 \times \text{age} + 0.348 \times \text{heart disease} + 0.898 \times \text{disease of central nervous system})</math>.</p> <p>*adjustment for over-fitting by shrinkage factor (SF) (SF = 0.993); the intercept was re-estimated.</p> |       |       |                        |

### Prediction model for estimation of risk for nerve damage.

| Variable                                                                                                                                                                                                                                                                                                                                                                                                                        | Regression coefficient | Regression coefficient<br>(adjusted with SF)* | Odds Ratio<br>(95% CI) |
|---------------------------------------------------------------------------------------------------------------------------------------------------------------------------------------------------------------------------------------------------------------------------------------------------------------------------------------------------------------------------------------------------------------------------------|------------------------|-----------------------------------------------|------------------------|
| Intercept                                                                                                                                                                                                                                                                                                                                                                                                                       | -2.209                 | -2.250                                        | -                      |
| Age (years)                                                                                                                                                                                                                                                                                                                                                                                                                     | -0.052                 | -0.051                                        | 0.949<br>(0.926-0.974) |
| Gender (man/woman)                                                                                                                                                                                                                                                                                                                                                                                                              | -0.258                 | -0.254                                        | 0.772<br>(0.319-1.868) |
| Smoking status (yes/no)                                                                                                                                                                                                                                                                                                                                                                                                         | 0.580                  | 0.572                                         | 1.754<br>(0.510-6.029) |
| Dysplasia (yes/no)                                                                                                                                                                                                                                                                                                                                                                                                              | -0.009                 | -0.009                                        | 0.993<br>(0.217-4.552) |
| <p>To calculate the absolute risk of nerve damage: <math>P_{(\text{nerve damage})} = 1/(1+e^{-\text{linear part}}) \times 100\%</math>;</p> <p>Linear part = <math>-2.250 + (-0.051 \times \text{age} - 0.254 \times \text{gender} + 0.572 \times \text{smoking status} - 0.009 \times \text{dysplasia})</math>.</p> <p>*adjustment for over-fitting by shrinkage factor (SF) (SF = 0.987); the intercept was re-estimated.</p> |                        |                                               |                        |

**eFigure 1. ROC curves and Calibration plots**

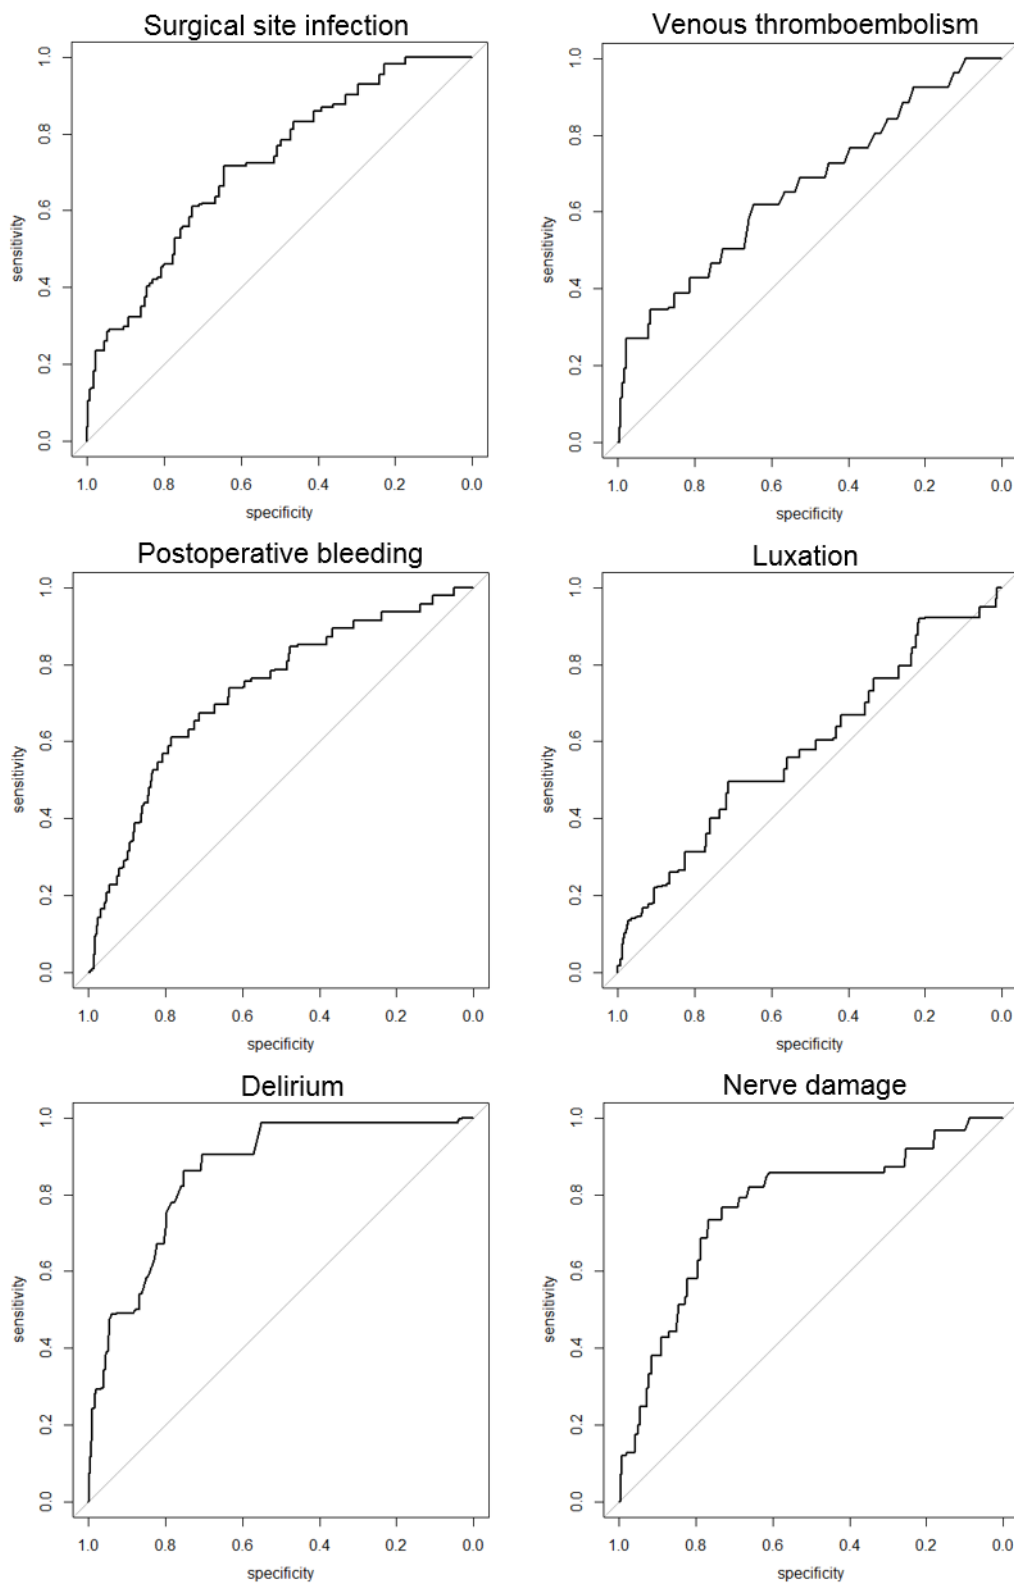

eFigure 1.1. Receiver Operating Characteristic curves of the prediction models for surgical site infection, venous thromboembolism, postoperative bleeding, luxation, delirium and nerve damage

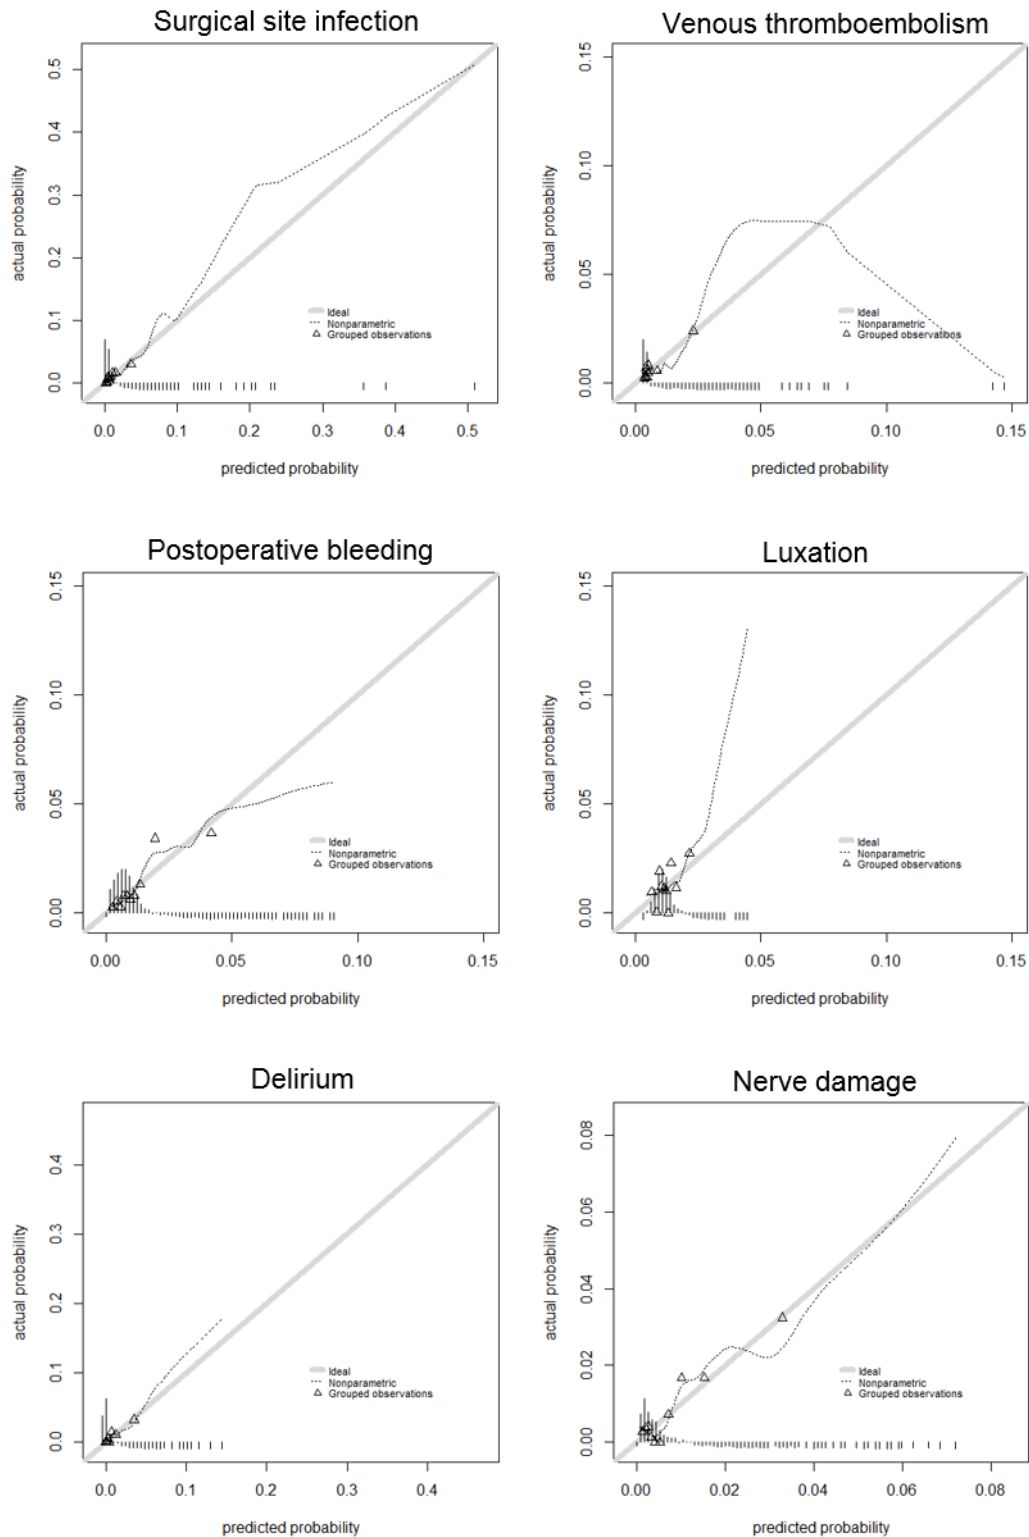

eFigure 1.2. Calibration plots with actual probability against the predicted probability for the models for surgical site infection, venous thromboembolism, postoperative bleeding, luxation, delirium and nerve damage. The triangles indicate quantiles ( $g=10$ ) of patients with a similar predicted probability of success. The grey diagonal line represents perfect agreement between predicted and actual probability

## REFERENCES

1. Almustafa MA, Ewen AM, Deakin AH, Picard F, Clarke JV, Mahmood FF. Risk Factors for Surgical Site Infection Following Lower Limb Arthroplasty: A Retrospective Cohort Analysis of 3932 Lower Limb Arthroplasty Procedures in a High Volume Arthroplasty Unit. *The Journal of Arthroplasty*. 2018;33(6):1861-7.
2. Moller AM, Villebro N, Pedersen T, Tonnesen H. Effect of preoperative smoking intervention on postoperative complications: a randomised clinical trial. *Lancet*. 2002;359(9301):114-7.
3. Namba RS, Paxton L, Fithian DC, Stone ML. Obesity and perioperative morbidity in total hip and total knee arthroplasty patients. *J Arthroplasty*. 2005;20(7 Suppl 3):46-50.
4. Chen J, Cui Y, Li X, Miao X, Wen Z, Xue Y, et al. Risk factors for deep infection after total knee arthroplasty: a meta-analysis. *Arch Orthop Trauma Surg*. 2013;133(5):675-87.
5. Podmore B, Hutchings A, van der Meulen J, Aggarwal A, Konan S. Impact of comorbid conditions on outcomes of hip and knee replacement surgery: a systematic review and meta-analysis. *BMJ Open*. 2018;8(7):e021784.
6. Migita K, Bito S, Nakamura M, Miyata S, Saito M, Kakizaki H, et al. Venous thromboembolism after total joint arthroplasty: results from a Japanese multicenter cohort study. *Arthritis Res Ther*. 2014;16(4):R154-R.
7. Yang G, Meng F, Liu Y, Kong L, Shen Y. Diabetes mellitus and risk of deep vein thrombosis after total knee replacement: a meta-analysis of cohort studies. *Int J Clin Exp Med*. 2015;8(6):9086-92.

- 1  
2  
3 8. Quintero JI, Cardenas LL, Navas M, Bautista MP, Bonilla GA, Llinas AM.  
4  
5 Primary Joint Arthroplasty Surgery: Is the Risk of Major Bleeding Higher in Elderly  
6  
7 Patients? A Retrospective Cohort Study. *J Arthroplasty*. 2016;31(10):2264-8.  
8  
9
- 10 9. Kunutsor SK, Barrett MC, Beswick AD, Judge A, Blom AW, Wylde V, et al. Risk  
11  
12 factors for dislocation after primary total hip replacement: a systematic review and  
13  
14 meta-analysis of 125 studies involving approximately five million hip replacements. *The*  
15  
16 *Lancet Rheumatology*. 2019;1(2):e111-e21.  
17  
18
- 19 10. Huang J, Sprung J, Weingarten TN. Delirium following total joint replacement  
20  
21 surgery. *Bosn J Basic Med Sci*. 2019;19(1):81-5.  
22  
23
- 24 11. Shetty T, Nguyen JT, Wu A, Sasaki M, Bogner E, Burge A, et al. Risk Factors  
25  
26 for Nerve Injury After Total Hip Arthroplasty: A Case-Control Study. *J Arthroplasty*.  
27  
28 2019;34(1):151-6.  
29  
30
- 31 12. Kawano S, Sonohata M, Kitajima M, Mawatari M. Risk Factors for the  
32  
33 Development of Nerve Palsy Following Primary Total Hip Arthroplasty. *Open Orthop*  
34  
35 *J*. 2018;12:164-72.  
36  
37
- 38 13. Farrell CM, Springer BD, Haidukewych GJ, Morrey BF. Motor nerve palsy  
39  
40 following primary total hip arthroplasty. *J Bone Joint Surg Am*. 2005;87(12):2619-25.  
41  
42
- 43 14. ZorginstituutNederland. Farmacotherapeutisch Kompas. 2020 [Available from:  
44  
45 <https://farmacotherapeutischkompas.nl>.  
46  
47  
48  
49  
50  
51  
52  
53  
54  
55  
56  
57  
58  
59  
60

| Input variables*                                       |                         |                         |                        |                        |                        |                        |          |                   |          |                   |              |                   |        |        |
|--------------------------------------------------------|-------------------------|-------------------------|------------------------|------------------------|------------------------|------------------------|----------|-------------------|----------|-------------------|--------------|-------------------|--------|--------|
|                                                        | Surgical site infection |                         | Venous thromboembolism |                        | Postoperative bleeding |                        | Luxation |                   | Delirium |                   | Nerve damage |                   |        |        |
| Age (years)                                            | 65                      | 0,031                   | 2,015                  | -0,008                 | -0,52                  | 0,033                  | 2,145    | 0,013             | 0,845    | 0,127             | 8,255        | -0,051            | -3,315 |        |
| Gender (male/female)                                   | 1                       |                         | 0                      | -0,168                 | -0,168                 |                        | 0        |                   | 0        |                   | 0            | -0,254            | -0,254 |        |
| BMI (kg/m2)                                            | 30                      | -0,002                  | -0,06                  |                        | 0                      | 0,012                  | 0,36     | 0,021             | 0,63     |                   | 0            |                   | 0      |        |
| Obesity (yes/no)                                       | 0                       |                         | 0                      | 1,376                  | 0                      |                        | 0        |                   | 0        |                   | 0            |                   | 0      |        |
| Smoking status (yes/no)                                | 0                       | 0,757                   | 0                      |                        | 0                      | -0,023                 |          | 0,491             | 0        |                   | 0            | 0,572             | 0      |        |
| Lung disease (yes/no)                                  | 0                       |                         | 0                      |                        | 0                      |                        | 0        |                   | 0        |                   | 0            |                   | 0      |        |
| Immunological disorder (yes/no)                        | 0                       | 0,891                   | 0                      |                        | 0                      |                        | 0        |                   | 0        |                   | 0            |                   | 0      |        |
| Rheumatoid arthritis (yes/no)                          | 0                       |                         | 0                      |                        | 0                      |                        | 0,538    |                   | 0        |                   | 0            |                   | 0      |        |
| Diabetes mellitus (yes/no)                             | 0                       | 0,904                   | 0                      | 0,829                  | 0                      |                        | 0        |                   | 0        |                   | 0            |                   | 0      |        |
| Liver disease (yes/no)                                 | 0                       | 2,345                   | 0                      |                        | 0                      |                        | 0        |                   | 0        |                   | 0            |                   | 0      |        |
| Heart disease (yes/no)                                 | 0                       |                         | 0                      |                        | 0,729                  |                        | 0        |                   | 0        | 0,348             | 0            |                   | 0      |        |
| Disease of central nervous system (yes/no)             | 0                       |                         | 0                      |                        | 0                      |                        | 0,106    |                   | 0,898    |                   | 0            |                   | 0      |        |
| Thromboembolic event (yes/no)                          | 0                       |                         | 0                      | 1,501                  | 0                      |                        | 0        |                   | 0        |                   | 0            |                   | 0      |        |
| Dysplasia (yes/no)                                     | 0                       |                         | 0                      |                        | 0                      |                        | 0        |                   | 0        |                   | 0            | -0,009            | 0      |        |
| Vitamin K antagonist use (yes/no)                      | 0                       |                         | 0                      |                        | 0,787                  |                        | 0        |                   | 0        |                   | 0            |                   | 0      |        |
| NSAID use (yes/no)                                     | 0                       | 0,619                   | 0                      |                        | 0                      |                        | 0        |                   | 0        |                   | 0            |                   | 0      |        |
|                                                        |                         | -7,272                  | 1,955                  | -4,79                  | -0,688                 | -7,172                 | 2,505    | -5,864            | 1,475    | -4,389            | -14,307      | 8,255             | -2,25  | -3,569 |
|                                                        |                         |                         | -5,317                 |                        | -5,478                 |                        | -4,667   |                   |          |                   | -6,052       |                   | -5,819 |        |
| <b>Predicted probability for residual symptoms (%)</b> |                         | <b>0,48834885</b>       |                        | <b>0,41602963</b>      |                        | <b>0,93128835</b>      |          | <b>1,22609394</b> |          | <b>0,23476267</b> |              | <b>0,29617761</b> |        |        |
|                                                        |                         | surgical site infection |                        | venous thromboembolism |                        | postoperative bleeding |          | luxation          |          | delirium          |              | nerve damage      |        |        |

\* Age: in years, Gender: male scored as 1 and female scored as 2, BMI: in kg/m2, Obesity: no scored as 0 and yes as 1, Smoking status: no scored as 0 and yes as 1, Lung disease: no scored as 0 and yes as 1, Immunological disorder: no scored as 0 and yes as 1

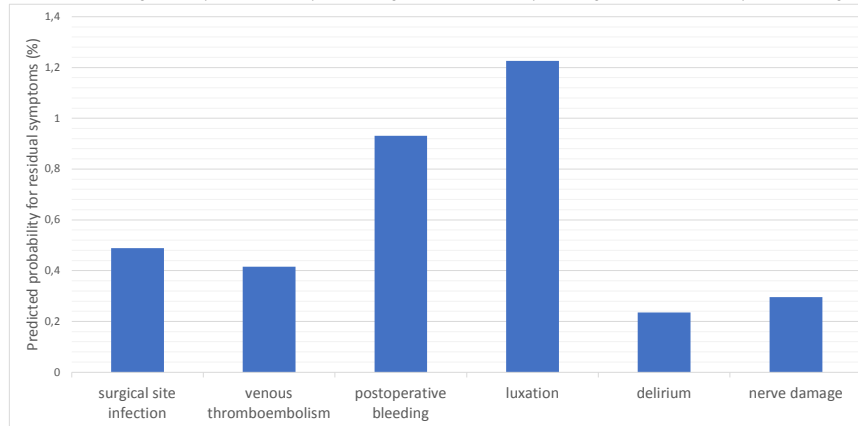



1  
2  
3  
4  
5  
6  
7  
8  
9  
10  
11  
12  
13  
14  
15  
16  
17  
18  
19  
20  
21  
22  
23  
24  
25  
26  
27  
28  
29  
30  
31

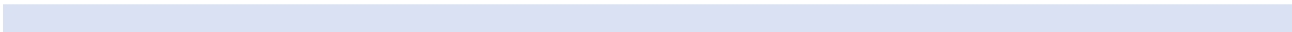

For peer review only

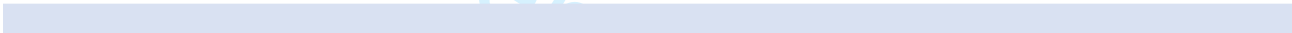

1, Rheumatoid arthritis: no scored as 0 and yes as 1, Diabetes mellitus: no scored as 0 and yes as 1, Liver disease: no scored as 0 and yes as 1, Heart disease: no scored as 0 and yes as 1, Disease of the central nervous system: no scored as 0 and yes as 1, Thrombo

1  
2  
3  
4  
5  
6  
7  
8  
9  
10  
11  
12  
13  
14  
15  
16  
17  
18  
19  
20  
21  
22  
23  
24  
25  
26  
27  
28  
29  
30  
31

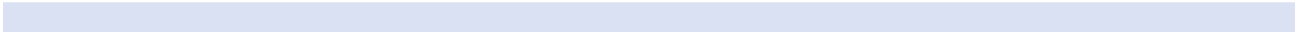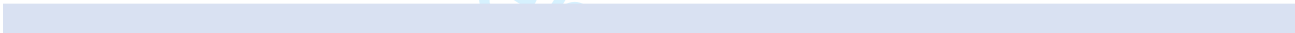

embolic event: no scored as 0 and yes as 1, Dysplasia: no scored as 0 and yes as 1, Vitamin K antagonists use: no scored as 0 and yes as 1, NSAID's: no scored as 0 and yes as 1

1  
2  
3  
4  
5  
6  
7  
8  
9  
10  
11  
12  
13  
14  
15  
16  
17  
18  
19  
20  
21  
22  
23  
24  
25  
26  
27  
28  
29  
30  
31

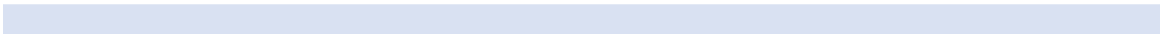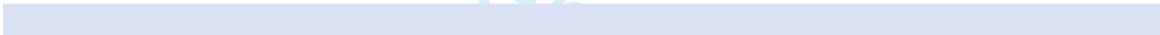

For peer review only

## TRIPOD Checklist: Prediction Model Development and Validation

| Section/Topic             | Item |     | Checklist item                                                                                                                                                                                   | Page |
|---------------------------|------|-----|--------------------------------------------------------------------------------------------------------------------------------------------------------------------------------------------------|------|
| <b>Title and abstract</b> |      |     |                                                                                                                                                                                                  |      |
| Title                     | 1    | D;V | Identify the study as developing and/or validating a multivariable prediction model, the target population, and the outcome to be predicted.                                                     | 1    |
| Abstract                  | 2    | D;V | Provide a summary of objectives, study design, setting, participants, sample size, predictors, outcome, statistical analysis, results, and conclusions.                                          | 3    |
| <b>Introduction</b>       |      |     |                                                                                                                                                                                                  |      |
| Background and objectives | 3a   | D;V | Explain the medical context (including whether diagnostic or prognostic) and rationale for developing or validating the multivariable prediction model, including references to existing models. | 5    |
|                           | 3b   | D;V | Specify the objectives, including whether the study describes the development or validation of the model or both.                                                                                | 5    |
| <b>Methods</b>            |      |     |                                                                                                                                                                                                  |      |
| Source of data            | 4a   | D;V | Describe the study design or source of data (e.g., randomized trial, cohort, or registry data), separately for the development and validation data sets, if applicable.                          | 6    |
|                           | 4b   | D;V | Specify the key study dates, including start of accrual; end of accrual; and, if applicable, end of follow-up.                                                                                   | 6    |
| Participants              | 5a   | D;V | Specify key elements of the study setting (e.g., primary care, secondary care, general population) including number and location of centres.                                                     | 6    |
|                           | 5b   | D;V | Describe eligibility criteria for participants.                                                                                                                                                  | 6-7  |
|                           | 5c   | D;V | Give details of treatments received, if relevant.                                                                                                                                                | 6-7  |
| Outcome                   | 6a   | D;V | Clearly define the outcome that is predicted by the prediction model, including how and when assessed.                                                                                           | 7    |
|                           | 6b   | D;V | Report any actions to blind assessment of the outcome to be predicted.                                                                                                                           | N/A  |
| Predictors                | 7a   | D;V | Clearly define all predictors used in developing or validating the multivariable prediction model, including how and when they were measured.                                                    | 7    |
|                           | 7b   | D;V | Report any actions to blind assessment of predictors for the outcome and other predictors.                                                                                                       | N/A  |
| Sample size               | 8    | D;V | Explain how the study size was arrived at.                                                                                                                                                       | 7    |
| Missing data              | 9    | D;V | Describe how missing data were handled (e.g., complete-case analysis, single imputation, multiple imputation) with details of any imputation method.                                             | 7-8  |
| Statistical               | 10a  | D   | Describe how predictors were handled in the analyses.                                                                                                                                            | 8-9  |

|                            |     |     |                                                                                                                                                                                                       |                       |
|----------------------------|-----|-----|-------------------------------------------------------------------------------------------------------------------------------------------------------------------------------------------------------|-----------------------|
| analysis methods           |     |     |                                                                                                                                                                                                       |                       |
|                            | 10b | D   | Specify type of model, all model-building procedures (including any predictor selection), and method for internal validation.                                                                         | 8-9                   |
|                            | 10c | V   | For validation, describe how the predictions were calculated.                                                                                                                                         | 8-9                   |
|                            | 10d | D;V | Specify all measures used to assess model performance and, if relevant, to compare multiple models.                                                                                                   | 8-9                   |
|                            | 10e | V   | Describe any model updating (e.g., recalibration) arising from the validation, if done.                                                                                                               | N/A                   |
| Risk groups                | 11  | D;V | Provide details on how risk groups were created, if done.                                                                                                                                             | N/A                   |
| Development vs. validation | 12  | V   | For validation, identify any differences from the development data in setting, eligibility criteria, outcome, and predictors.                                                                         | N/A                   |
| <b>Results</b>             |     |     |                                                                                                                                                                                                       |                       |
| Participants               | 13a | D;V | Describe the flow of participants through the study, including the number of participants with and without the outcome and, if applicable, a summary of the follow-up time. A diagram may be helpful. | 10, Figure 1          |
|                            | 13b | D;V | Describe the characteristics of the participants (basic demographics, clinical features, available predictors), including the number of participants with missing data for predictors and outcome.    | 10, Table 1           |
|                            | 13c | V   | For validation, show a comparison with the development data of the distribution of important variables (demographics, predictors and outcome).                                                        | N/A                   |
| Model development          | 14a | D   | Specify the number of participants and outcome events in each analysis.                                                                                                                               | 10, Table 1           |
|                            | 14b | D   | If done, report the unadjusted association between each candidate predictor and outcome.                                                                                                              | eTable 6              |
| Model specification        | 15a | D   | Present the full prediction model to allow predictions for individuals (i.e., all regression coefficients, and model intercept or baseline survival at a given time point).                           | Table 2, eTable 6     |
|                            | 15b | D   | Explain how to use the prediction model.                                                                                                                                                              | Table 2, eTable 6, 11 |
| Model performance          | 16  | D;V | Report performance measures (with CIs) for the prediction model.                                                                                                                                      | Table 2, eTable 6     |
| Model-updating             | 17  | V   | If done, report the results from any model updating (i.e., model specification, model performance).                                                                                                   | N/A                   |
| <b>Discussion</b>          |     |     |                                                                                                                                                                                                       |                       |
| Limitations                | 18  | D;V | Discuss any limitations of the study (such as nonrepresentative sample, few events per predictor, missing data).                                                                                      | 17-19                 |

|                           |     |     |                                                                                                                                                |       |
|---------------------------|-----|-----|------------------------------------------------------------------------------------------------------------------------------------------------|-------|
| Interpretation            | 19a | V   | For validation, discuss the results with reference to performance in the development data, and any other validation data.                      | 17-19 |
|                           | 19b | D;V | Give an overall interpretation of the results, considering objectives, limitations, results from similar studies, and other relevant evidence. | 17-19 |
| Implications              | 20  | D;V | Discuss the potential clinical use of the model and implications for future research.                                                          | 17-19 |
| <b>Other information</b>  |     |     |                                                                                                                                                |       |
| Supplementary information | 21  | D;V | Provide information about the availability of supplementary resources, such as study protocol, Web calculator, and data sets.                  | 19-20 |
| Funding                   | 22  | D;V | Give the source of funding and the role of the funders for the present study.                                                                  | 19    |

\*Items relevant only to the development of a prediction model are denoted by D, items relating solely to a validation of a prediction model are denoted by V, and items relating to both are denoted D;V. We recommend using the TRIPOD Checklist in conjunction with the TRIPOD Explanation and Elaboration document.

# BMJ Open

## Development of prediction models for complications after primary total hip and knee arthroplasty: a single-centre retrospective cohort study in the Netherlands.

|                                 |                                                                                                                                                                                                                                                                                                                                                                          |
|---------------------------------|--------------------------------------------------------------------------------------------------------------------------------------------------------------------------------------------------------------------------------------------------------------------------------------------------------------------------------------------------------------------------|
| Journal:                        | <i>BMJ Open</i>                                                                                                                                                                                                                                                                                                                                                          |
| Manuscript ID                   | bmjopen-2022-062065.R1                                                                                                                                                                                                                                                                                                                                                   |
| Article Type:                   | Original research                                                                                                                                                                                                                                                                                                                                                        |
| Date Submitted by the Author:   | 23-May-2022                                                                                                                                                                                                                                                                                                                                                              |
| Complete List of Authors:       | Sweerts, Lieke; Radboudumc, Department of Orthopaedics; Radboudumc, IQ healthcare<br>Hoogeboom, Thomas J; Radboudumc, IQ healthcare<br>van Wessel, Thierry; Radboudumc, Department of Orthopaedics<br>Van der Wees, Philip; Radboudumc, IQ healthcare; Radboudumc, Department of Rehabilitation<br>van de Groes, Sebastiaan A.W.; Radboudumc, Department of Orthopaedics |
| <b>Primary Subject Heading</b>: | Patient-centred medicine                                                                                                                                                                                                                                                                                                                                                 |
| Secondary Subject Heading:      | Epidemiology                                                                                                                                                                                                                                                                                                                                                             |
| Keywords:                       | Hip < ORTHOPAEDIC & TRAUMA SURGERY, Knee < ORTHOPAEDIC & TRAUMA SURGERY, ORTHOPAEDIC & TRAUMA SURGERY                                                                                                                                                                                                                                                                    |
|                                 |                                                                                                                                                                                                                                                                                                                                                                          |

SCHOLARONE™  
Manuscripts



I, the Submitting Author has the right to grant and does grant on behalf of all authors of the Work (as defined in the below author licence), an exclusive licence and/or a non-exclusive licence for contributions from authors who are: i) UK Crown employees; ii) where BMJ has agreed a CC-BY licence shall apply, and/or iii) in accordance with the terms applicable for US Federal Government officers or employees acting as part of their official duties; on a worldwide, perpetual, irrevocable, royalty-free basis to BMJ Publishing Group Ltd ("BMJ") its licensees and where the relevant Journal is co-owned by BMJ to the co-owners of the Journal, to publish the Work in this journal and any other BMJ products and to exploit all rights, as set out in our [licence](#).

The Submitting Author accepts and understands that any supply made under these terms is made by BMJ to the Submitting Author unless you are acting as an employee on behalf of your employer or a postgraduate student of an affiliated institution which is paying any applicable article publishing charge ("APC") for Open Access articles. Where the Submitting Author wishes to make the Work available on an Open Access basis (and intends to pay the relevant APC), the terms of reuse of such Open Access shall be governed by a Creative Commons licence – details of these licences and which [Creative Commons](#) licence will apply to this Work are set out in our licence referred to above.

Other than as permitted in any relevant BMJ Author's Self Archiving Policies, I confirm this Work has not been accepted for publication elsewhere, is not being considered for publication elsewhere and does not duplicate material already published. I confirm all authors consent to publication of this Work and authorise the granting of this licence.



## Title Page

### (1) Title

Development of prediction models for complications after primary total hip and knee arthroplasty: a single-centre retrospective cohort study in the Netherlands.

### (2) Authors' names

Lieke Sweerts MSc<sup>1,2</sup>, Thomas J. Hoogeboom, PhD<sup>2</sup>, Thierry van Wessel MSc<sup>1</sup>, Philip J. van der Wees, PhD<sup>2,3</sup>, Sebastiaan A.W. van de Groes, MD, PhD, BEng<sup>1</sup>

### (3) Institution(s) at which the work was performed

### (4) Institution (and city and state or country) with which each author is affiliated

<sup>1</sup> Radboud university medical center, Radboud Institute for Health Sciences, Department of Orthopaedics, Nijmegen, The Netherlands

<sup>2</sup> Radboud university medical center, Radboud Institute for Health Sciences, IQ healthcare, Nijmegen, The Netherlands

<sup>3</sup> Radboud university medical center, Radboud Institute for Health Sciences, Department of Rehabilitation, Nijmegen, The Netherlands

### (5) Email addresses

[Lieke.Sweerts@radboudumc.nl](mailto:Lieke.Sweerts@radboudumc.nl)

[Thomas.Hoogeboom@radboudumc.nl](mailto:Thomas.Hoogeboom@radboudumc.nl)

[Thierry.vanWessel@radboudumc.nl](mailto:Thierry.vanWessel@radboudumc.nl)

[Philip.vanderWees@radboudumc.nl](mailto:Philip.vanderWees@radboudumc.nl)

[Sebastiaan.vandeGroes@radboudumc.nl](mailto:Sebastiaan.vandeGroes@radboudumc.nl)

### (6) Corresponding author and e-mail address

Lieke Sweerts, [Lieke.Sweerts@radboudumc.nl](mailto:Lieke.Sweerts@radboudumc.nl)

Postbus 9101

6500 HB Nijmegen

1  
2  
3  
4  
5  
6  
7  
8  
9  
10  
11  
12  
13  
14  
15  
16  
17  
18  
19  
20  
21  
22  
23  
24  
25  
26  
27  
28  
29  
30  
31  
32  
33  
34  
35  
36  
37  
38  
39  
40  
41  
42  
43  
44  
45  
46  
47  
48  
49  
50  
51  
52  
53  
54  
55  
56  
57  
58  
59  
60

The Netherlands

(7) Word count

Abstract: 300

Manuscript: 3,266

For peer review only

## Abstract

*Objective.* The aim of the study was to develop prediction models for patients with THA and TKA to predict the risk for surgical complications based on personal factors, comorbidities, and medication use.

*Design.* Retrospective cohort study.

*Setting.* Tertiary Care in outpatient clinic of university medical center.

*Participants.* 3,776 patients with a primary THA or TKA between 2004 and 2018.

*Primary and secondary outcome measures.* Multivariable logistic regression models were developed for primary outcome surgical site infection (SSI), and secondary outcomes venous thromboembolism (VTE), postoperative bleeding (POB), luxation, delirium, and nerve damage (NER).

*Results.* For SSI, age, smoking status, BMI, presence of immunological disorder, diabetes mellitus, liver disease, and use of NSAID's were included. An area under the receiver operating characteristic curve (AUC) of 71.9%(95%CI=69.4-74.4) was found. For this model, liver disease showed to be the strongest predictor with an odds ratio of 10.7(95%CI=2.4-46.6). The models for POB and NER showed AUCs of 73.0%(95%CI=70.7-75.4) and 76.6%(95%CI=73.2-80.0), respectively. For delirium an AUC of 85.9%(95%CI=83.8-87.9) was found, and for the predictive algorithms for luxation and VTE we found least favorable results (AUC= 58.4%(95%CI=55.0-61.8) and 66.3%(95%CI=62.7-69.9)).

Included predictors for secondary outcomes are presented in Table 2 and eTable 5.

*Conclusions.* Discriminative ability was reasonable for SSI and predicted probabilities ranged from 0.01%-51.0%. We expect this to enhance shared decision making in considering THA or TKA since current counseling is predicated on population-based probability of risk, rather than using personalized prediction. We consider our models for SSI, delirium and NER appropriate for clinical use when taking under- and overestimation of predicted risk into account. For VTE and POB, caution concerning overestimation exceeding a predicted probability of 0.08 for VTE and 0.05 for POB should be taken into account. Furthermore, future studies should evaluate clinical impact and whether the models are feasible in an external population.

*Keywords.* total hip arthroplasty; total knee arthroplasty; surgical complications; prediction; prognosis; comorbidities; medication use

1  
2  
3 *Strengths and limitations of this study.*  
4

- 5 - This study included multivariable logistic regression models to predict postoperative  
6 complications after primary total hip- and knee arthroplasty based on personal factors,  
7 comorbidities, and medication use.  
8  
9  
10 - The present study was conducted and reported according the transparent reporting of a  
11 multivariable prediction model for individual prognosis or diagnosis (TRIPOD) guidelines.  
12  
13 - Purposive selection of predictors by clinical reasoning and literature search.  
14  
15 - Limitations include only internal validation of the prediction models by bootstrapping.  
16  
17 - Used data were not primarily registered for research purposes, and therefore, their detail and  
18 accuracy could be less than optimal.  
19  
20  
21  
22  
23  
24  
25  
26  
27  
28  
29  
30  
31  
32  
33  
34  
35  
36  
37  
38  
39  
40  
41  
42  
43  
44  
45  
46  
47  
48  
49  
50  
51  
52  
53  
54  
55  
56  
57  
58  
59  
60

## Introduction

Joint replacement is a recommended intervention for people with end stage hip or knee osteoarthritis.<sup>1</sup>

Whether surgery is the best solution depends on many individual factors such as severity of the disease, level of experienced pain and discomfort, medication use, personal circumstances, comorbid diseases, and intended type of surgery.<sup>2-4</sup> Because the decision to have surgery or not is complex, a shared decision making (SDM) process is warranted. This process allows patients and clinicians to discuss treatment options consistent with the patient's values and preferences.<sup>5</sup>

Information on most likely prognosis is central in this dialogue as the clinician provides guidance and information about expected outcomes, including the risk on surgical complications, when facing the decision to pursue or forgo surgery. However, providing personalized information about the risk on surgical complications, based on personal characteristics of the patient, is challenging. Available evidence often consists of average outcomes and current guidelines on prediction of outcome still recommend counselling predicated on population-based probability of risk, rather than using personalized prediction.<sup>6</sup> This is remarkable, as discussing potential personal risks is an important aspect of SDM.<sup>7,8</sup>

To overcome this problem, the development of prediction models is emerging. It has been shown that useful prediction on postoperative outcome can be made predicated on preoperative data like demographic factors, pain scores, and physical functioning measured with Patient Reported Outcome Measures (PROMs), to identify patients at risk of not benefitting from total knee arthroplasty (TKA) in general.<sup>9-11</sup> Another study developed a preoperative prediction model to predict residual complaints on pain, functional outcome and treatment success for individual patients after TKA.<sup>12</sup> Also useful electronic risk calculators predicting complications and mortality for patients and clinicians are available for specific populations.<sup>13,14</sup> In one study, data of patients registered in the Medicare database, the federal health insurance program for individuals aged  $\geq 65$  years, are used for development of a risk calculator. However, the exact patient characteristics of the study population are not reported and the effect of the predictors remain unclear.<sup>14</sup> In another study, regression models are based on the results of univariate analyses on a broad range of data as demographics, comorbidities, and laboratory, or test values of a mainly male Veteran population, and the authors reported suboptimal performance scores for prediction of most outcomes.<sup>13</sup> Generalizability of prediction models based on specific patient populations may be

1  
2  
3 limited, and further evaluation of potential risk factors is needed to validate prediction models for  
4 complications after primary total hip- and knee replacement.  
5

6  
7 As it is known from literature that personal factors including demographic characteristics and  
8 comorbidities have an impact on surgical complications,<sup>3</sup> these assumed caused relationships might  
9 therefore serve as basis for a risk prediction model. Therefore, the aim of this study is to develop a  
10 prediction model for clinicians and patients with hip- or knee osteoarthritis considering surgery, by  
11 predicting risk for surgical complications based on personal factors, comorbidities and medication use.  
12  
13  
14  
15  
16  
17  
18  
19  
20  
21  
22  
23  
24  
25  
26  
27  
28  
29  
30  
31  
32  
33  
34  
35  
36  
37  
38  
39  
40  
41  
42  
43  
44  
45  
46  
47  
48  
49  
50  
51  
52  
53  
54  
55  
56  
57  
58  
59  
60

For peer review only

## Methods

### *Study design and setting*

For this retrospective cohort study, we established a cohort of patients who underwent primary total hip- (THA) or TKA between 2004 and 2018 at the Orthopedic department of Radboud university medical center Nijmegen, the Netherlands. Datasets were merged into one centralized database based on patient number, birthdate and date of surgery.

This study was performed and reported in line with transparent reporting of a multivariable prediction model for individual prognosis or diagnosis (TRIPOD) guidelines.<sup>15</sup>

### *Data collection*

Data used for this study were extracted from (electronic) medical records of Radboudumc, Dutch Arthroplasty Register (LROI), and Radboudumc registry of complications. We primarily extracted comorbidities and medication use from medical records. These data were extracted based on coding and were obtained by three researchers (LS, TW and AT) by use of a standardized operating procedure, and stored in a centralized platform (Castor Electronic Data Capture (EDC)).<sup>16</sup> Data about patient characteristics like age, sex, BMI, smoking status, American Society of Anesthesiologists (ASA) classification and diagnosis for surgery were extracted from LROI. Furthermore, date of surgery, type of surgery (primary or revision), surgery side, and type of implant were extracted.<sup>17</sup> From the register of complications we extracted all surgeries and complications which occurred within one year after THA or TKA.<sup>18</sup> In this registry, surgery related orthopedic complications were registered as well as other medical complications.<sup>19</sup> All complications were registered by location code combined with a code for the nature of the complication.<sup>18</sup> Some registrations were unclear and could refer to one of predefined complications and were therefore checked in medical records by LS. For all included location- and nature of complication codes per surgical complication, see eTable 1.

### *Inclusion and exclusion criteria*

Patients were eligible for inclusion in the cohort if the surgery concerned primary THA or TKA. We defined primary THA or TKA as the first time a total prosthesis is placed. Revision arthroplasty was defined as any change (replacement, removal, or addition) of one or several components of the joint

1  
2  
3 prosthesis.<sup>17</sup> We expected revision arthroplasty to influence risk for complications negatively, therefore  
4  
5 revision arthroplasty was excluded for this study.  
6  
7

#### 8 9 *Outcome* (dependent variables)

10 Prediction models were developed over the pooled THA and TKA data for six predefined surgical  
11 complications. Primary outcome was surgical site infection (SSI), and secondary outcomes included  
12 venous thromboembolism (VTE), postoperative bleeding (POB), luxation, delirium, and nerve damage  
13 (NER). All prediction models were developed based on primary THA and TKA data, except for the  
14 models for luxation and NER which were developed based on primary THA data. These surgical  
15 complications are uncommon in TKA.  
16  
17  
18  
19  
20  
21  
22  
23

#### 24 *Predictors* (independent variables)

25  
26 In total sixteen predictor candidates were selected based on evidence from previous reports and clinical  
27 reasoning in relation to the outcomes. These included patient characteristics, comorbidities, and  
28 medication use (as specified in eTable 2 and 3). Note that we made a purposive selection from the  
29 sixteen predictors candidates to serve as predictors for the different surgical complications.  
30  
31  
32

33 Comorbidities extracted from medical records were categorized according to the English National Health  
34 Service (NHS). The NHS considered these categories relevant comorbid categories in terms of outcome  
35 prediction.<sup>3</sup> Medication use was reduced to the active substance of the drug and was categorized to  
36 drug groups according the Dutch pharmacotherapeutic compass.<sup>20</sup>  
37  
38  
39  
40  
41  
42

#### 43 *Sample size*

44  
45 It is recommended that at least five events are collected for each predictor that is evaluated in  
46 multivariable regression analysis.<sup>21 22</sup> An event was defined as the least frequent outcome status, which  
47 in our case was the presence of surgical complication. In the Netherlands, the estimated risk of a  
48 complication like SSI is 3%<sup>23</sup>; therefore, in order to develop a model with six predictors, at least 30  
49 events were required, and so a sample size of at least 1000 patients was required.  
50  
51  
52  
53  
54  
55

#### 56 *Missing data*

57  
58  
59  
60



1  
2  
3 Data were checked for completeness by investigating patterns of missingness to assess presence of a  
4 nonrandom element. Incomplete data were double checked. Missing data were imputed using multiple  
5 imputation, as the omission of patients who have one or more predictor variables missing from analysis  
6  
7 can cause considerable loss of precision and might bias the results.<sup>24 25</sup> The number of imputations was  
8  
9 set to ten. The imputation was checked for accuracy by visual inspection and frequencies.  
10  
11  
12

### 13 14 *Statistical analysis methods*

#### 15 16 Model development

17  
18 Evidence from literature, clinical reasoning and eyeballing guided selection of predictors to be included  
19  
20 in the models. Eyeballing was done by evaluation of potential higher frequencies of predictors in relation  
21  
22 to the outcome.<sup>26</sup> All selected predictors were entered into a multivariable logistic regression model,  
23  
24 using the occurrence of a surgical complication as outcome variable. The prediction model was pooled  
25  
26 over the imputed datasets.<sup>27</sup>  
27  
28  
29

#### 30 31 Internal validation

32  
33 To reduce risk of overfitting, we internally validated the model using bootstrapping. In this step, B-  
34  
35 bootstrap samples of B=1000 were drawn with replacement from original data, which reflects drawing  
36  
37 samples from underlying population. Due to the drawing with replacement, a bootstrapped dataset  
38  
39 allows for containing the same original cases. Other validation methods resample without replacement  
40  
41 and thereby such validation datasets are produced through a pre-specified number of surrogate  
42  
43 datasets, and each of the original cases will be left out exactly once, which results in a smaller dataset.  
44  
45 Since our dataset is not very large, we decided to use bootstrapping as internal validation method.  
46  
47 Bootstrapping was performed to estimate the performance in future patients, and to adjust the model by  
48  
49 the calculated shrinkage factor so that future predictions will be less extreme.<sup>21</sup>  
50

#### 51 52 Performance of the model

53  
54 We quantified measures of performance, discrimination and calibration. Overall model performance is  
55  
56 the distance between predicted- and actual outcome.<sup>25</sup> To quantify overall model performance, we  
57  
58 assessed Brier, Brier<sub>scaled</sub> and Nagelkerke's R<sup>2</sup>. For Brier, squared differences between actual outcome  
59  
60 and predictions were calculated. Brier can range from 0 for a perfect model to 0.25 for a noninformative

1  
2  
3 model with 50% incidence of the outcome.  $Brier_{scaled}$  is scaled by its maximum under a noninformative  
4 model and range between 0-100%. Nagelkerke's  $R^2$  is a measure of explained variation.<sup>28</sup> The ability of  
5 the model to discriminate between those with and without the outcome was quantified as the area under  
6 the receiver operating characteristic curve (AUC). This can range from 50% (no discriminative capacity)  
7 to 100% (perfect discriminative capacity). The discriminative capacity was interpreted as reasonable  
8 when AUC was  $>0.70$  and good when AUC was  $>0.80$ .<sup>29</sup> Calibration of the model is the agreement  
9 between predicted probabilities (probability of an event calculated with the model) and observed  
10 frequencies of outcome (accuracy) and was assessed by visually inspecting the calibration plot.<sup>25</sup>  
11 Furthermore, we computed Hosmer and Lemeshow (H-L) goodness-of-fit as a quantitative measure of  
12 calibration. A high H-L statistic is related to a low P-value, and indicates a poor fit.<sup>21</sup>  
13  
14 All statistical analyses were performed using R 3.5.3. Packages `vim`, `mice`, `rms`, `pROC`, and  
15 `generalhoslem` were used.  
16  
17  
18  
19  
20  
21  
22  
23  
24  
25  
26  
27

### 28 *Patient and Public Involvement*

29 Patients were involved in the design of the study which included consultation during grant writing and  
30 advice in setting up the study design. Furthermore, patients were involved in the process of incorporating  
31 the prediction models in a patient decision aid. Focus groups were held and patients and clinicians  
32 together were asked for their opinion regarding incorporation of the models in the preoperative process.  
33  
34  
35  
36  
37  
38  
39  
40  
41  
42  
43  
44  
45  
46  
47  
48  
49  
50  
51  
52  
53  
54  
55  
56  
57  
58  
59  
60

## Results

### *Participants*

In total 3,776 patients with primary THA or TKA were identified as eligible for the present study. Of these patients, 2,494 patients underwent THA and 1,282 patients underwent TKA. See Figure 1 for participant flow. Baseline characteristics of the final cohort are presented in Table 1.

### *Model development*

The number of missing values per predictor are shown in Table 1. For the majority of potential predictors, there was only a small quantity of missing data; however, smoking status was missing in 24.7%. After imputation, all patients were available for multivariable modelling. There were no missing values in surgical complications.

### *Model specification*

According to our selection of predictor candidates per outcome (depicted in eTable 4), we entered all selected predictors in the model. For SSI, these predictors were: age, smoking status, BMI, presence of an immunological disorder, diabetes mellitus, liver disease, and use of Non-Steroidal Anti-Inflammatory Drugs (NSAID's). We found a significant influence of age, immunological disorder, diabetes mellitus and liver disease of which the presence of liver disease showed to be the strongest predictor with an odds ratio of 10.7 (95%CI=2.4–46.6). The bootstrap yielded a shrinkage factor of 0.984, which was used to adjust the regression coefficients. Table 2 shows the adjusted prediction models and odds ratios that estimates the risk for SSI and secondary outcomes. For original prediction models and adjusted coefficients, see eTable 5.

### *Model performance*

Brier, Brier<sub>scaled</sub> and Nagelkerke's  $R^2$ , to assess overall performance of the model for SSI, were 0.010, 0.026 and 0.081 respectively.

The discriminative performance of the model for SSI is shown in Figure 2. The AUC was 71.9 (95%CI=69.4–74.4%), which indicates reasonable discriminative ability. Predicted probabilities ranged between 0.01%–51.0%, with a mean of 1.0% (SD=1.5%). Calibration was poor, indicated by significant H-L statistic ( $p<0.001$ ). The corresponding calibration plot that represents the accuracy of the model is

1  
2  
3 shown in Figure 3. The calibration plot showed quite accurate prediction, especially when the risk is low.  
4  
5 The model underestimates the risk with a predicted probability >0.10.  
6  
7 The performance, discrimination and calibration of SSI and secondary outcomes are presented in Table  
8  
9 3. The predictive algorithms for POB and NER showed reasonable discriminative values (AUC=73.0  
10  
11 and 76.6) and explained fraction of variance by a Nagelkerke's  $R^2$  of 0.072 and 0.086 respectively. The  
12  
13 prediction model for delirium showed good discriminative value (AUC=85.9) and explained fraction of  
14  
15 variance of 0.193. The models for luxation and VTE showed least favorable results on discrimination  
16  
17 (AUC=58.4 and 66.3 respectively) and explained fraction of variance of 0.010 and 0.047 respectively.  
18  
19 The ROC curves and calibration plots for secondary outcomes are presented in eFigure 1.  
20  
21  
22  
23  
24  
25  
26  
27  
28  
29  
30  
31  
32  
33  
34  
35  
36  
37  
38  
39  
40  
41  
42  
43  
44  
45  
46  
47  
48  
49  
50  
51  
52  
53  
54  
55  
56  
57  
58  
59  
60

Table 1. Patient characteristics

| Patient characteristics           | Missing values | Total population<br>(n=3776) | Total hip replacement<br>(n=2494) | Total knee replacement<br>(n=1282) |
|-----------------------------------|----------------|------------------------------|-----------------------------------|------------------------------------|
| Age, mean (SD), years             | 0.1%           | 60.2 (15.8)                  | 57.7 (17.0)                       | 65.1 (11.7)                        |
| Gender: female No. (%)            | 0.1%           | 2298 (60.9%)                 | 1468 (58.9%)                      | 829 (64.7%)                        |
| BMI, mean (SD), kg/m <sup>2</sup> | 2.6%           | 27.5 (5.2)                   | 26.6 (4.7)                        | 29.3 (5.6)                         |
| Smoking: yes No. (%)              | 24.7%          | 498 (13.2)                   | 341 (13.7)                        | 157 (12.2)                         |
| ASA classification No. (%)        | 0.4%           |                              |                                   |                                    |
| I                                 |                | 839 (22.2)                   | 669 (26.8)                        | 170 (13.3)                         |
| II                                |                | 2091 (55.4)                  | 1314 (52.7)                       | 777 (60.6)                         |
| III                               |                | 829 (22.0)                   | 500 (20.0)                        | 329 (25.7)                         |
| Diagnosis hip No. (%)             | 0.4%           |                              |                                   |                                    |
| arthrosis                         |                |                              | 1599 (64.1)                       |                                    |
| rheumatoid arthritis              |                |                              | 68 (2.7)                          |                                    |
| dysplasia                         |                |                              | 241 (9.7)                         |                                    |
| osteonecrosis                     |                |                              | 228 (9.1)                         |                                    |
| other                             |                |                              | 349 (14.0)                        |                                    |
| Diagnosis knee No. (%)            | 0.9%           |                              |                                   |                                    |
| arthrosis                         |                |                              |                                   | 1037 (80.9)                        |
| rheumatoid arthritis              |                |                              |                                   | 123 (9.6)                          |
| other                             |                |                              |                                   | 111 (8.7)                          |
| Side affected: right No. (%)      | 0.3%           | 1915 (50.9)                  | 1257 (50.4)                       | 658 (51.3)                         |
| Surgical complications No. (%)    | 0%             |                              |                                   |                                    |
| surgical site infection           |                | 38 (1.0)                     | 25 (1.0)                          | 13 (1.0)                           |
| venous thromboembolism            |                | 26 (0.7)                     | 17 (0.7)                          | 9 (0.7)                            |
| postoperative bleeding            |                | 47 (1.2)                     | 28 (1.1)                          | 19 (1.5)                           |
| luxation                          |                | 32 (0.8)                     | 31 (1.2)                          | 1 (0.1)                            |

1  
2  
3  
4  
5  
6  
7  
8  
9  
10  
11  
12  
13  
14  
15  
16  
17  
18  
19  
20  
21  
22  
23  
24  
25  
26  
27  
28  
29  
30  
31  
32  
33  
34  
35  
36  
37  
38  
39  
40  
41  
42  
43  
44  
45  
46  
47  
48  
49  
50  
51  
52  
53  
54  
55  
56  
57  
58  
59  
60

|              |  |          |          |         |
|--------------|--|----------|----------|---------|
| delirium     |  | 24 (0.6) | 20 (0.8) | 4 (0.3) |
| nerve damage |  | 24 (0.6) | 21 (0.8) | 3 (0.2) |

For peer review only

Table 2. Models including the coefficient per predictor per surgical outcome

| Variable                                   | Surgical site infection |                       | Venous thromboembolism |                      | Postoperative bleeding |                     | Luxation      |                     | Delirium      |                     | Nerve damage  |                     |
|--------------------------------------------|-------------------------|-----------------------|------------------------|----------------------|------------------------|---------------------|---------------|---------------------|---------------|---------------------|---------------|---------------------|
|                                            | Coefficient *           | Odds Ratio (95% CI)   | Coefficient *          | Odds Ratio (95% CI)  | Coefficient *          | Odds Ratio (95% CI) | Coefficient * | Odds Ratio (95% CI) | Coefficient * | Odds Ratio (95% CI) | Coefficient * | Odds Ratio (95% CI) |
| Intercept                                  | -7.272                  | -                     | -4.790                 | -                    | -7.172                 | -                   | -5.864        | -                   | -14.307       | -                   | -2.250        | -                   |
| Age (years)                                | 0.031                   | 1.032 (1.005-1.059)   | -0.008                 | 0.991 (0.966-1.018)  | 0.033                  | 1.034 (1.006-1.062) | 0.013         | 1.014 (0.991-1.038) | 0.127         | 1.137 (1.067-1.212) | -0.051        | 0.949 (0.926-0.974) |
| Gender (male/female)                       | -                       | -                     | -0.168                 | 0.844 (0.377-1.888)  | -                      | -                   | -             | -                   | -             | -                   | -0.254        | 0.772 (0.319-1.868) |
| BMI (kg/m <sup>2</sup> )                   | -0.002                  | 0.998 (0.937-1.063)   | -                      | -                    | 0.012                  | 1.012 (0.954-1.073) | 0.021         | 1.023 (0.951-1.099) | -             | -                   | -             | -                   |
| Obesity (yes/no)                           | -                       | -                     | 1.376                  | 4.040 (1.462-11.159) | -                      | -                   | -             | -                   | -             | -                   | -             | -                   |
| Smoking status (yes/no)                    | 0.757                   | 2.145 (0.883-5.213)   | -                      | -                    | -0.023                 | 0.952 (0.336-2.701) | 0.491         | 1.667 (0.651-4.268) | -             | -                   | 0.572         | 1.754 (0.510-6.029) |
| Lung disease (yes/no)                      | -                       | -                     | -                      | -                    | -                      | -                   | -             | -                   | -             | -                   | -             | -                   |
| Immunological disorder (yes/no)            | 0.891                   | 2.474 (1.186-5.158)   | -                      | -                    | -                      | -                   | -             | -                   | -             | -                   | -             | -                   |
| Rheumatoid arthritis (yes/no)              | -                       | -                     | -                      | -                    | -                      | -                   | 0.538         | 1.752 (0.408-7.530) | -             | -                   | -             | -                   |
| Diabetes mellitus (yes/no)                 | 0.904                   | 2.494 (1.125 - 5.529) | 0.829                  | 2.317 (0.870-6.173)  | -                      | -                   | -             | -                   | -             | -                   | -             | -                   |
| Liver disease (yes/no)                     | 2.345                   | 10.659 (2.441-46.555) | -                      | -                    | -                      | -                   | -             | -                   | -             | -                   | -             | -                   |
| Heart disease (yes/no)                     | -                       | -                     | -                      | -                    | 0.729                  | 2.086 (1.040-4.183) | -             | -                   | 0.348         | 1.422 (0.590-3.428) | -             | -                   |
| Disease of central nervous system (yes/no) | -                       | -                     | -                      | -                    | -                      | -                   | 0.106         | 1.113 (0.324-3.822) | 0.898         | 2.465 (0.936-6.490) | -             | -                   |
| Thromboembolic event (yes/no)              | -                       | -                     | 1.501                  | 4.586 (1.521-13.826) | -                      | -                   | -             | -                   | -             | -                   | -             | -                   |
| Dysplasia (yes/no)                         | -                       | -                     | -                      | -                    | -                      | -                   | -             | -                   | -             | -                   | -0.009        | 0.993               |

1  
2  
3  
4  
5  
6  
7  
8  
9  
10  
11  
12  
13  
14  
15  
16  
17  
18  
19  
20  
21  
22  
23  
24  
25  
26  
27  
28  
29  
30  
31  
32  
33  
34  
35  
36  
37  
38  
39  
40  
41  
42  
43  
44  
45  
46

|                                                                                                                                                                                                                                                                                                                                                                                           |       |                     |   |   |       |                     |   |   |   |   |   |               |
|-------------------------------------------------------------------------------------------------------------------------------------------------------------------------------------------------------------------------------------------------------------------------------------------------------------------------------------------------------------------------------------------|-------|---------------------|---|---|-------|---------------------|---|---|---|---|---|---------------|
|                                                                                                                                                                                                                                                                                                                                                                                           |       |                     |   |   |       |                     |   |   |   |   |   | (0.217-4.552) |
| Vitamin K antagonist use (yes/no)                                                                                                                                                                                                                                                                                                                                                         | -     | -                   | - | - | 0.787 | 2.220 (1.022-4.821) | - | - | - | - | - | -             |
| NSAID's (yes/no)                                                                                                                                                                                                                                                                                                                                                                          | 0.619 | 1.877 (0.946-3.725) | - | - | -     | -                   | - | - | - | - | - | -             |
| <p>To calculate the absolute risk for the surgical complications: <math>P_{(surgical\ complication)} = 1 / (1 + \exp(-linear\ part)) \times 100\%</math>. Linear part = intercept + (coefficients * variables).<br/> *adjustment for over-fitting by shrinkage factor (SF); the intercept was re-estimated.<br/> BMI: Body Mass Index, NSAID's: Non-Steroidal Anti-Inflammatory Drugs</p> |       |                     |   |   |       |                     |   |   |   |   |   |               |

For peer review only



Table 3. Model performance

|                             | Surgical site infection | Venous Thrombo-embolism | Post-operative bleeding | Luxation            | Delirium            | Nerve damage        |
|-----------------------------|-------------------------|-------------------------|-------------------------|---------------------|---------------------|---------------------|
| Brier score                 | 0.010                   | 0.007                   | 0.012                   | 0.012               | 0.006               | 0.008               |
| Brier <sub>scaled</sub>     | 0.026                   | 0.007                   | 0.010                   | 0.003               | 0.027               | 0.012               |
| Nagelkerke's R <sup>2</sup> | 0.081                   | 0.047                   | 0.072                   | 0.010               | 0.193               | 0.086               |
| AUC<br>(95%CI)              | 71.9<br>(69.4-74.4)     | 66.3<br>(62.7-69.9)     | 73.0<br>(70.7-75.4)     | 58.4<br>(55.0-61.8) | 85.9<br>(83.8-87.9) | 76.6<br>(73.2-80.0) |
| H-L statistic<br>(p-value)  | p < 0.001               | p < 0.001               | p < 0.001               | p < 0.001           | p < 0.001           | p < 0.001           |
| Predicted possibilities     |                         |                         |                         |                     |                     |                     |
| Mean                        | 0.010                   | 0.007                   | 0.012                   | 0.012               | <0.001              | 0.008               |
| SD                          | 0.015                   | 0.007                   | 0.012                   | 0.004               | 0.012               | 0.010               |
| Range                       | 0.001-0.510             | 0.003-0.147             | 0.001-0.090             | 0.005-0.045         | <0.001-0.147        | 0.001-0.072         |
| Shrinkage factor            | 0.984                   | 0.986                   | 0.989                   | 0.941               | 0.993               | 0.987               |

## Discussion

The prediction models developed in this study are aimed for personalized counselling and SDM in orthopedic outpatient clinics. With our models, risk for surgical site infection (SSI), venous thromboembolism (VTE), postoperative bleeding (POB), luxation, delirium, and nerve damage (NER) can be predicted by patient characteristics, comorbidities and medication use. For SSI, predicted probabilities range between 0.01%-51.0%, which makes the model useful in adding relevant personalized information for adequate SDM compared to the previously used population-based probability of risk of 3%.<sup>23</sup> However, it is important to state that the model showed moderately accurate prediction, especially when the risk is low. The model underestimates the risk with a predicted probability >10%. Therefore, predicted probabilities exceeding 10% should be interpreted with caution. Furthermore, other performance measures were moderate to reasonable, indicating moderate overall performance of the model for SSI. We found similar results for other outcomes, except for the model for luxation; this model seriously underestimates the risk for luxation and could therefore not be used for personalized counselling.

Our results are comparable with the results of a recent meta-analysis on impact of comorbidities on SSI in THA or TKA. The authors stated diabetes and liver disease to contribute to a higher risk for SSI.<sup>3</sup> Another study with similar discriminative capacity found BMI, use of immunosuppression, ASA-score, procedure duration, and prior surgeries as risk factors for SSI.<sup>30</sup> Some of these predictors did not contribute to a higher performance in our model and were therefore not included. We additionally found age to be a significant predictor for SSI. For the already available prediction model based on data of Veterans with osteoarthritis of Harris et al., independent variables of the model cannot be compared for SSI since these results have not been reported.<sup>13</sup> We found a slightly better c-statistic (AUC) of 0.72 compared to 0.66 in their boosted model. Also comparison with Bozic et al., is difficult since applicability to non-Medicare population is questionable, as they also describe in their discussion.<sup>14</sup>

Based on literature we expected use of thromboprophylaxis, such as platelet aggregation inhibitors, direct oral anticoagulants, low-molecular-weight heparin, and/or vitamin K antagonists to be important predictors for POB. However, we could not demonstrate this finding in our model.<sup>31</sup> This is perhaps due to low frequencies of these predictors in our participants with POB and due to improved preoperative care regarding anticoagulant therapy. Our model for delirium included comparable predictors as other studies; they showed that age and preexisting cognitive impairment are important predictors for

1  
2  
3 delirium.<sup>32 33</sup> Our model confirms this finding. Kalisvaart et al., 2006 developed a comparable model  
4 based on acute- and elective hip surgery patients and found comparable predictors. The authors  
5 additionally found acute admission as predictor for delirium.<sup>32</sup> We cannot confirm this in our model since  
6 we focused on primary THA and TKA and these interventions are not primarily preferred in acute  
7 admissions due to hip fracture. The AUC indicates that our model is more accurate in estimating the risk  
8 for delirium (85.9 vs. 73).<sup>32</sup>

9  
10 For VTE we only found obesity and thromboembolic event as significant risk factors.<sup>3 34</sup> This can be  
11 explained by the fact that the recurrence rate is high after earlier thromboembolic events.<sup>35</sup> We could  
12 not demonstrate diabetes to be a significant predictor for VTE.<sup>3</sup> For the risk of luxation, it is known that  
13 causes of dislocation are multifactorial and also caused by non-patient modifiable factors such as  
14 implant-related, surgery-related, and hospital-related factors. It is unclear to what extent these factors  
15 contribute to the occurrence of luxation, but we expect these factors to be of influence the model.<sup>36 37</sup>  
16 For these reasons, and the poor performance of the model for luxation, we consider this model of  
17 insufficient quality for use in patient information documents. Since we aimed our models to support  
18 preoperative SDM, we only used patient related variables as these variables are considered  
19 modifiable.<sup>36 38</sup>

### 20 21 22 23 24 25 26 27 28 29 30 31 32 33 34 35 36 *Strengths and limitations*

37 A strong point is that we thoroughly created a big dataset and we used state-of-the-art statistics for our  
38 analyses. Furthermore, the simplicity of our models is a strength because we used predictors collected  
39 in usual care. The predictors are easily to assess and thereby easily to implement in care. Several  
40 limitations in this study should be noted. We retrospectively analyzed prospectively collected data.  
41 These data were not primarily registered for research purposes and therefore their detail and accuracy  
42 could be less than optimal. Moreover, changes in reporting systems took place during the studied period,  
43 for instance the introduction of electronic medical records. It is known that changes in coding practice  
44 may change completeness of data.<sup>39 40</sup> Although researchers performed data collection thoroughly, data  
45 about comorbidities and medication use could be missed because it was reported elsewhere. Moreover,  
46 we expect a small quantity of underreporting regarding comorbidities since physicians and  
47 anesthesiologists perchance make a selection of important comorbidities in their report. We tried to  
48 correct for this limitation by including medication use since all drugs are registered in preoperative  
49  
50  
51  
52  
53  
54  
55  
56  
57  
58  
59  
60

1  
2  
3 anesthesia report. Also, data from 2004 until 2018 were used. In this period preoperative care has been  
4  
5 changed. To evaluate the effect of this change on our outcome, we checked our patterns of  
6  
7 complications and found no differences in this period. Furthermore, due to a low estimated event rate  
8  
9 (1-3%) we needed a large population to have enough events to include predictors into our models.  
10  
11 However, since not all predictors were significant in our final models, we expect that inclusion of more  
12  
13 predictors would not lead to a considerably different model, as also discussed above. The models were  
14  
15 developed based on pooled THA and TKA data. It is expected that the influence of patient  
16  
17 characteristics, comorbidities and medication use is comparable for both THA and TKA.<sup>41</sup> The influence  
18  
19 of comorbidities on outcomes is studied together quite often.<sup>3</sup> Furthermore, we tested this assumption  
20  
21 by performing the analysis on THA and TKA data only. The models with corresponding performance  
22  
23 measures were still consistent with the main analysis. Another limitation is that we only performed  
24  
25 internal validation by bootstrapping, and were not yet able to determine external validity and clinical  
26  
27 impact of the models. For clinical impact it is also important to determine the Minimal Clinically Important  
28  
29 Difference of the outcomes.  
30  
31

### 32 *Conclusion*

33  
34 Clinical prediction models were developed to contribute to more unbiased and accurate counselling in  
35  
36 considering THA or TKA and are expected to be useful for identifying patients at risk for surgical  
37  
38 complications. For SSI, the discriminative ability was reasonable and predicted risk varied between  
39  
40 0.01%-51.0%. We expect the individual predicted risk to enhance SDM and support a well-founded  
41  
42 choice. We consider our models for SSI, delirium, and NER appropriate for clinical use when taking  
43  
44 under- and overestimation of predicted risk into account. For clinical use of the models VTE and POB,  
45  
46 caution concerning overestimation exceeding predicted probability of 0.08 and 0.05 (data presented in  
47  
48 calibration plots in eFigure 1), respectively, should be taken into account. Future studies should evaluate  
49  
50 clinical impact and whether our models are feasible in an external population.  
51  
52

### 53 *Supplementary information*

54  
55 In the supplementary file, an excel file with the prediction models calculator is provided, see Appendix  
56  
57 1. The decision aid including the prediction models is published in Dutch at the website of the Radboud  
58  
59 university medical center.  
60

1  
2  
3  
4  
5 *Ethics Statement*

6  
7 Approval for this study was obtained at the Medical Ethical Committee of Radboudumc (2018-4880).  
8  
9

10  
11 *Funding statement*

12 This work was supported by the Dutch National Health Care Institute [Transparency about the quality of  
13 care 2018: using outcome information for SDM]. Grant number: N/A. The funding source was not  
14 involved during the study.  
15  
16  
17

18  
19  
20 *Competing interests*

21 P. Van der Wees participates in the Scientific Advisory Panel of the American Physical Therapy  
22 Association (APTA)  
23  
24  
25

26  
27  
28 *Acknowledgements*

29 We thank Anouk Tulp for her contribution to the data collection. Furthermore we would like to  
30 acknowledge Stefan Riemens for offering help in reviewing the manuscript for grammar and wording.  
31  
32  
33

34  
35  
36 *Author's contribution*

37 All authors confirm authorship on all four ICMJE criteria.

38  
39 *Conceptualization* – Lieke Sweerts, Thomas Hoogeboom, Philip van der Wees, Sebastiaan van de  
40 Groes  
41

42  
43 *Data curation* – Lieke Sweerts

44  
45 *Formal analysis* – Lieke Sweerts, Thomas Hoogeboom, Thierry van Wessel, Sebastiaan van de Groes

46  
47 *Funding acquisition* – Sebastiaan van de Groes

48  
49 *Investigation* – Lieke Sweerts, Thierry van Wessel

50  
51 *Methodology* – Lieke Sweerts, Thomas Hoogeboom, Philip van der Wees, Sebastiaan van de Groes

52  
53 *Project administration* – Lieke Sweerts

54  
55 *Resources* – Lieke Sweerts, Thierry van Wessel

56  
57 *Software* –

58  
59 *Supervision* – Thomas Hoogeboom, Philip van der Wees, Sebastiaan van de Groes  
60

1  
2  
3 *Validation* – Lieke Sweerts

4  
5 *Visualization* – Lieke Sweerts, Thierry van Wessel

6  
7 *Writing – original draft* – Lieke Sweerts

8  
9 *Writing – review & editing* – Thomas Hoogeboom, Thierry van Wessel, Philip van der Wees,

10  
11 Sebastiaan van de Groes

12  
13  
14 *Data availability statement*

15  
16 Raw data will not be shared via a public data repository. Data will be available upon request via the

17  
18 Data repository from Radboudumc.  
19  
20  
21  
22  
23  
24  
25  
26  
27  
28  
29  
30  
31  
32  
33  
34  
35  
36  
37  
38  
39  
40  
41  
42  
43  
44  
45  
46  
47  
48  
49  
50  
51  
52  
53  
54  
55  
56  
57  
58  
59  
60

## References

1. Smink AJ, van den Ende CHM, Vliet Vlieland TPM, et al. "Beating osteoARthritis": Development of a stepped care strategy to optimize utilization and timing of non-surgical treatment modalities for patients with hip or knee osteoarthritis. *Clinical Rheumatology* 2011;30(12):1623-29. doi: 10.1007/s10067-011-1835-x
2. Mota REM, Tarricone R, Ciani O, et al. Determinants of demand for total hip and knee arthroplasty: a systematic literature review. *BMC health services research* 2012;12:225-25. doi: 10.1186/1472-6963-12-225
3. Podmore B, Hutchings A, van der Meulen J, et al. Impact of comorbid conditions on outcomes of hip and knee replacement surgery: a systematic review and meta-analysis. *BMJ Open* 2018;8(7):e021784. doi: 10.1136/bmjopen-2018-021784 [published Online First: 2018/07/13]
4. Hawker GA, Badley EM, Borkhoff CM, et al. Which patients are most likely to benefit from total joint arthroplasty? *Arthritis Rheum* 2013;65(5):1243-52. doi: 10.1002/art.37901 [published Online First: 2013/03/06]
5. Ten Have IA, van den Bekerom MP, van Deurzen DF, et al. Role of decision aids in orthopaedic surgery. *World journal of orthopedics* 2015;6(11):864-66. doi: 10.5312/wjo.v6.i11.864
6. Chawla NV, Davis DA. Bringing big data to personalized healthcare: a patient-centered framework. *J Gen Intern Med* 2013;28 Suppl 3(Suppl 3):S660-S65. doi: 10.1007/s11606-013-2455-8
7. Elwyn G. Idealistic, impractical, impossible? Shared decision making in the real world. *Br J Gen Pract* 2006;56(527):403-04.
8. Elwyn G, Edwards A, Hood K, et al. Achieving involvement: process outcomes from a cluster randomized trial of shared decision making skill development and use of risk communication aids in general practice. *Family Practice* 2004;21(4):337-46. doi: 10.1093/fampra/cmh401
9. Riddle DL, Golladay GJ, Jiranek WA, et al. External Validation of a Prognostic Model for Predicting Nonresponse Following Knee Arthroplasty. *J Arthroplasty* 2017;32(4):1153-58.e1. doi: 10.1016/j.arth.2016.11.007 [published Online First: 2016/12/07]
10. Barlow T, Dunbar M, Sprowson A, et al. Development of an outcome prediction tool for patients considering a total knee replacement--the Knee Outcome Prediction Study (KOPS). *BMC musculoskeletal disorders* 2014;15:451. doi: 10.1186/1471-2474-15-451 [published Online First: 2014/12/30]

- 1  
2  
3 11. Lungu E, Desmeules F, Dionne CE, et al. Prediction of poor outcomes six months following total  
4  
5 knee arthroplasty in patients awaiting surgery. *BMC musculoskeletal disorders* 2014;15:299.  
6  
7 doi: 10.1186/1471-2474-15-299 [published Online First: 2014/09/10]  
8
- 9 12. Tolk JJ, Waarsing JEH, Janssen RPA, et al. Development of Preoperative Prediction Models for  
10  
11 Pain and Functional Outcome After Total Knee Arthroplasty Using The Dutch Arthroplasty  
12  
13 Register Data. *J Arthroplasty* 2019 doi: 10.1016/j.arth.2019.10.010 [published Online First:  
14  
15 2019/11/13]
- 16 13. Harris AH, Kuo AC, Bowe T, et al. Prediction Models for 30-Day Mortality and Complications After  
17  
18 Total Knee and Hip Arthroplasties for Veteran Health Administration Patients With  
19  
20 Osteoarthritis. *The Journal of arthroplasty* 2018;33(5):1539-45. doi: 10.1016/j.arth.2017.12.003  
21  
22 [published Online First: 2017/12/13]  
23
- 24 14. Bozic KJ, Ong K, Lau E, et al. Estimating risk in Medicare patients with THA: an electronic risk  
25  
26 calculator for periprosthetic joint infection and mortality. *Clinical orthopaedics and related*  
27  
28 *research* 2013;471(2):574-83. doi: 10.1007/s11999-012-2605-z [published Online First:  
29  
30 2012/11/21]  
31
- 32 15. Moons KG, Altman DG, Reitsma JB, et al. Transparent Reporting of a multivariable prediction model  
33  
34 for Individual Prognosis or Diagnosis (TRIPOD): explanation and elaboration. *Ann Intern Med*  
35  
36 2015;162(1):W1-73. doi: 10.7326/m14-0698 [published Online First: 2015/01/07]  
37
- 38 16. Castor EDC. Castor Electronic Data Capture 2019 [27 Aug. 2019]. Available from:  
39  
40 <https://castoredc.com> accessed August 28, 2019.  
41
- 42 17. van Steenberghe LN, Denissen GAW, Spooren A, et al. More than 95% completeness of reported  
43  
44 procedures in the population-based Dutch Arthroplasty Register. *Acta orthopaedica*  
45  
46 2015;86(4):498-505. doi: 10.3109/17453674.2015.1028307 [published Online First:  
47  
48 2015/07/21]
- 49 18. de Waal Malefijt MC. An orthopedic complication-registration system. *Acta orthopaedica*  
50  
51 *Scandinavica* 1995;66(1):84-9. [published Online First: 1995/02/01]  
52
- 53 19. van der Wees PJ, Wammes JJ, Akkermans RP, et al. Patient-reported health outcomes after total  
54  
55 hip and knee surgery in a Dutch University Hospital Setting: results of twenty years clinical  
56  
57 registry. *BMC musculoskeletal disorders* 2017;18(1):97. doi: 10.1186/s12891-017-1455-y  
58  
59 [published Online First: 2017/03/04]  
60



- 1
- 2
- 3 20. ZorginstituutNederland. Farmacotherapeutisch Kompas. 2020 [Available from:
- 4 <https://farmacotherapeutischkompas.nl2020>.
- 5
- 6
- 7 21. Peduzzi P, Concato J, Kemper E, et al. A simulation study of the number of events per variable in
- 8 logistic regression analysis. *Journal of clinical epidemiology* 1996;49(12):1373-9. [published
- 9 Online First: 1996/12/01]
- 10
- 11
- 12 22. Vittinghoff E, McCulloch CE. Relaxing the rule of ten events per variable in logistic and Cox
- 13 regression. *Am J Epidemiol* 2007;165(6):710-8. doi: 10.1093/aje/kwk052 [published Online
- 14 First: 2006/12/22]
- 15
- 16
- 17
- 18 23. van Arkel E, van der Kraan J, Hageman M, et al. Consultkaart Artrose in de heup. 2016
- 19
- 20 24. Donders AR, van der Heijden GJ, Stijnen T, et al. Review: a gentle introduction to imputation of
- 21 missing values. *Journal of clinical epidemiology* 2006;59(10):1087-91. doi:
- 22 10.1016/j.jclinepi.2006.01.014 [published Online First: 2006/09/19]
- 23
- 24
- 25
- 26 25. Steyerberg EW. Clinical Prediction Models. New York: Springer 2009.
- 27
- 28 26. Salkind NJ. Encyclopedia of Measurement and Statistics. 2007 doi: 10.4135/9781412952644
- 29
- 30 27. RUBIN DB. Inference and missing data. *Biometrika* 1976;63(3):581-92. doi:
- 31 10.1093/biomet/63.3.581
- 32
- 33 28. Steyerberg EW, Vickers AJ, Cook NR, et al. Assessing the performance of prediction models: a
- 34 framework for traditional and novel measures. *Epidemiology* 2010;21(1):128-38. doi:
- 35 10.1097/EDE.0b013e3181c30fb2 [published Online First: 2009/12/17]
- 36
- 37
- 38
- 39 29. Hosmer DW, Lemeshow S, Sturdivant R. Applied Logistic Regression (3rd Edition). New York: Wiley
- 40 2013:528.
- 41
- 42
- 43 30. Berbari EF, Osmon DR, Lahr B, et al. The Mayo prosthetic joint infection risk score: implication for
- 44 surgical site infection reporting and risk stratification. *Infect Control Hosp Epidemiol*
- 45 2012;33(8):774-81. doi: 10.1086/666641 [published Online First: 2012/07/05]
- 46
- 47
- 48
- 49 31. Lindquist DE, Stewart DW, Brewster A, et al. Comparison of Postoperative Bleeding in Total Hip and
- 50 Knee Arthroplasty Patients Receiving Rivaroxaban, Enoxaparin, or Aspirin for
- 51 Thromboprophylaxis. *Clinical and Applied Thrombosis/Hemostasis* 2018;24(8):1315-21. doi:
- 52 10.1177/1076029618772337
- 53
- 54
- 55 32. Kalisvaart KJ, Vreeswijk R, De Jonghe JFM, et al. Risk Factors and Prediction of Postoperative
- 56 Delirium in Elderly Hip-Surgery Patients: Implementation and Validation of a Medical Risk Factor
- 57
- 58
- 59
- 60

- 1  
2  
3 Model. *Journal of the American Geriatrics Society* 2006;54(5):817-22. doi: 10.1111/j.1532-  
4 5415.2006.00704.x  
5  
6  
7 33. Lindroth H, Bratzke L, Purvis S, et al. Systematic review of prediction models for delirium in the older  
8 adult inpatient. *BMJ Open* 2018;8(4):e019223. doi: 10.1136/bmjopen-2017-019223  
9  
10 34. Migita K, Bito S, Nakamura M, et al. Venous thromboembolism after total joint arthroplasty: results  
11 from a Japanese multicenter cohort study. *Arthritis Res Ther* 2014;16(4):R154-R54. doi:  
12 10.1186/ar4616  
13  
14  
15  
16 35. Hansson P-O, Sörbo J, Eriksson H. Recurrent Venous Thromboembolism After Deep Vein  
17 Thrombosis: Incidence and Risk Factors. *Archives of Internal Medicine* 2000;160(6):769-74.  
18 doi: 10.1001/archinte.160.6.769  
19  
20  
21  
22 36. Dargel J, Oppermann J, Brüggemann G-P, et al. Dislocation following total hip replacement. *Dtsch*  
23 *Arztebl Int* 2014;111(51-52):884-90. doi: 10.3238/arztebl.2014.0884  
24  
25  
26 37. Kunutsor SK, Barrett MC, Beswick AD, et al. Risk factors for dislocation after primary total hip  
27 replacement: a systematic review and meta-analysis of 125 studies involving approximately five  
28 million hip replacements. *The Lancet Rheumatology* 2019;1(2):e111-e21. doi: 10.1016/S2665-  
29 9913(19)30045-1  
30  
31  
32  
33 38. Fessy MH, Putman S, Viste A, et al. What are the risk factors for dislocation in primary total hip  
34 arthroplasty? A multicenter case-control study of 128 unstable and 438 stable hips. *Orthop*  
35 *Traumatol Surg Res* 2017;103(5):663-68. doi: 10.1016/j.otsr.2017.05.014 [published Online  
36 First: 2017/06/21]  
37  
38  
39  
40 39. Schneeweiss S, Avorn J. A review of uses of health care utilization databases for epidemiologic  
41 research on therapeutics. *Journal of clinical epidemiology* 2005;58(4):323-37. doi:  
42 <https://doi.org/10.1016/j.jclinepi.2004.10.012>  
43  
44  
45  
46 40. Hemkens LG, Contopoulos-Ioannidis DG, Ioannidis JPA. Routinely collected data and comparative  
47 effectiveness evidence: promises and limitations. *CMAJ* 2016;188(8):E158-E64. doi:  
48 10.1503/cmaj.150653 [published Online First: 2016/02/16]  
49  
50  
51  
52 41. Dobson PF, Reed MR. Prevention of infection in primary THA and TKA. *EFORT Open Rev*  
53 2020;5(10):604-13. doi: 10.1302/2058-5241.5.200004  
54  
55  
56  
57  
58  
59  
60

**Abbreviations used in manuscript**

|    |                                                             |
|----|-------------------------------------------------------------|
| 1  |                                                             |
| 2  |                                                             |
| 3  |                                                             |
| 4  |                                                             |
| 5  |                                                             |
| 6  | ASA: American Society of Anesthesiologists                  |
| 7  |                                                             |
| 8  | AUC: Area under the receiver operating characteristic curve |
| 9  |                                                             |
| 10 | H-L: Hosmer and Lemeshow                                    |
| 11 |                                                             |
| 12 | LROI: Dutch Arthroplasty Register                           |
| 13 |                                                             |
| 14 | NER: Nerve damage                                           |
| 15 |                                                             |
| 16 | NHS: National Health Service                                |
| 17 |                                                             |
| 18 | NOV: Dutch Orthopaedic Association                          |
| 19 |                                                             |
| 20 | NSAID's: Non-Steroidal Anti-Inflammatory Drugs              |
| 21 |                                                             |
| 22 | POB: Postoperative bleeding                                 |
| 23 |                                                             |
| 24 | PROMs: Patient Reported Outcome Measures                    |
| 25 |                                                             |
| 26 | SDM: Shared decision making                                 |
| 27 |                                                             |
| 28 | SSI: Surgical site infection                                |
| 29 |                                                             |
| 30 | THA: Total hip arthroplasty                                 |
| 31 |                                                             |
| 32 | TKA: Total knee arthroplasty                                |
| 33 |                                                             |
| 34 | VTE: Venous Thromboembolism                                 |
| 35 |                                                             |
| 36 |                                                             |
| 37 |                                                             |
| 38 |                                                             |
| 39 |                                                             |
| 40 |                                                             |
| 41 |                                                             |
| 42 |                                                             |
| 43 |                                                             |
| 44 |                                                             |
| 45 |                                                             |
| 46 |                                                             |
| 47 |                                                             |
| 48 |                                                             |
| 49 |                                                             |
| 50 |                                                             |
| 51 |                                                             |
| 52 |                                                             |
| 53 |                                                             |
| 54 |                                                             |
| 55 |                                                             |
| 56 |                                                             |
| 57 |                                                             |
| 58 |                                                             |
| 59 |                                                             |
| 60 |                                                             |

1  
2  
3 Figure 1. Flow chart for inclusion and exclusion of patients. Variables indicated with an asterisk\* were  
4 primarily extracted from the LROI database. When these data were missing, the data were extracted  
5 from the (electronic) medical record. Castor EDC is indicated by Castor  
6  
7  
8  
9  
10  
11  
12  
13  
14  
15  
16  
17  
18  
19  
20  
21  
22  
23  
24  
25  
26  
27  
28  
29  
30  
31  
32  
33  
34  
35  
36  
37  
38  
39  
40  
41  
42  
43  
44  
45  
46  
47  
48  
49  
50  
51  
52  
53  
54  
55  
56  
57  
58  
59  
60

For peer review only

1  
2  
3 Figure 2. Receiver Operating Characteristic curve of the prediction model for surgical site infection  
4

5 AUC=71.9 (95% CI = 69.4–74.4%)  
6  
7  
8  
9  
10  
11  
12  
13  
14  
15  
16  
17  
18  
19  
20  
21  
22  
23  
24  
25  
26  
27  
28  
29  
30  
31  
32  
33  
34  
35  
36  
37  
38  
39  
40  
41  
42  
43  
44  
45  
46  
47  
48  
49  
50  
51  
52  
53  
54  
55  
56  
57  
58  
59  
60

For peer review only

1  
2  
3 Figure 3. Calibration plot with the actual probability against the predicted probability for the model for  
4 surgical site infection. The triangles indicate quantiles ( $g=10$ ) of patients with a similar predicted  
5 probability of success. The grey diagonal line represents perfect agreement between predicted and  
6  
7  
8  
9 actual probability  
10  
11  
12  
13  
14  
15  
16  
17  
18  
19  
20  
21  
22  
23  
24  
25  
26  
27  
28  
29  
30  
31  
32  
33  
34  
35  
36  
37  
38  
39  
40  
41  
42  
43  
44  
45  
46  
47  
48  
49  
50  
51  
52  
53  
54  
55  
56  
57  
58  
59  
60

For peer review only

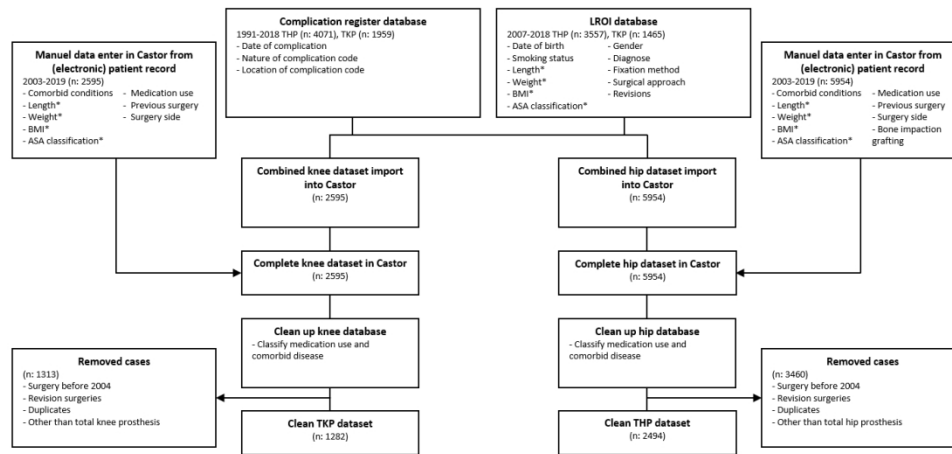

Figure 1. Flow chart for inclusion and exclusion of patients. Variables indicated with an asterisk\* were primarily extracted from the LROI database. When these data were missing, the data were extracted from the (electronic) medical record. Castor EDC is indicated by Castor

247x129mm (150 x 150 DPI)

1  
2  
3  
4  
5  
6  
7  
8  
9  
10  
11  
12  
13  
14  
15  
16  
17  
18  
19  
20  
21  
22  
23  
24  
25  
26  
27  
28  
29  
30  
31  
32  
33  
34  
35  
36  
37  
38  
39  
40  
41  
42  
43  
44  
45  
46  
47  
48  
49  
50  
51  
52  
53  
54  
55  
56  
57  
58  
59  
60



Figure 2. Receiver Operating Characteristic curve of the prediction model for surgical site infection  
AUC=71.9 (95%-CI = 69.4–74.4%)  
145x145mm (96 x 96 DPI)





Figure 3. Calibration plot with the actual probability against the predicted probability for the model for surgical site infection. The triangles indicate quantiles (g=10) of patients with a similar predicted probability of success. The grey diagonal line represents perfect agreement between predicted and actual probability

145x145mm (96 x 96 DPI)

**Supplemental Material**

|                                                                |    |
|----------------------------------------------------------------|----|
| eTable 1. Categorization of surgical complications             | 2  |
| eTable 2. Predictors per outcome                               | 4  |
| eTable 3. Categorization of comorbidities                      | 6  |
| eTable 4. Categorization of drug groups                        | 9  |
| eTable 5. Original prediction models and adjusted coefficients | 11 |
| eFigure 1. ROC curves and Calibration plots                    | 15 |
| References                                                     | 17 |

For peer review only

**eTable 1. Categorization of surgical complications**

| <b>Surgical site infection*</b> |                        |                               |                              |
|---------------------------------|------------------------|-------------------------------|------------------------------|
| Location code**                 | Location**             | Code nature of complication** | Nature of complication**     |
| 24                              | Pelvis                 | 012                           | Prosthesis infection         |
| 40                              | Hip                    | 083                           | Deep infection               |
| 42                              | Knee                   | 134                           | Infected organ               |
| <b>Venous thromboembolism</b>   |                        |                               |                              |
| 24                              | Pelvis                 | 104                           | Thrombosis                   |
| 40                              | Hip                    | 105                           | Embolus                      |
| 41                              | Femur/upper leg        |                               |                              |
| 42                              | Knee                   |                               |                              |
| 43                              | Lower leg              |                               |                              |
| 50                              | Lung                   |                               |                              |
| 56                              | Venous system          |                               |                              |
| <b>Luxation</b>                 |                        |                               |                              |
| 40                              | Hip                    | 041                           | Luxation                     |
|                                 |                        | 086                           | Disconnection prosthesis     |
| <b>Delirium</b>                 |                        |                               |                              |
| 54                              | Central nervous system | 141                           | Psychological decompensation |
| 58                              | Total                  |                               |                              |
| <b>Nerve damage</b>             |                        |                               |                              |
| 40                              | Hip                    | 094                           | Nerve lesion                 |
| 41                              | Femur/upper leg        |                               |                              |
| 43                              | Lower leg              |                               |                              |
| 57                              | Arterial system        |                               |                              |
| <b>Postoperative bleeding</b>   |                        |                               |                              |
| 40                              | Hip                    | 014                           | Wound leakage                |
| 41                              | Femur/upper leg        | 022                           | Bleeding                     |

|    |               |     |                   |
|----|---------------|-----|-------------------|
| 42 | Knee          | 100 | Secondary         |
| 56 | Venous system | 136 | bleeding/hematoma |
|    |               |     | Bleeding organ    |

\* the records registered with the nature of complication 010 (infection around sutures), 011 (superficial infection), 013 (local wound necrosis) and 014 (wound leakage) are checked for occurrence of surgical site infection and added to the outcome surgical site infection when this was the case.

\*\* only depicted when location code or code of the nature of complication occurred in the register.

Furthermore records registered with nature of complication 125 (interruption of sterility) were checked for occurrence of a surgical complication.

**eTable 2. Predictors per outcome**

|                            | OR*/RR** (95% CI)  | Study                      |
|----------------------------|--------------------|----------------------------|
| Surgical site infection    |                    |                            |
| Age                        |                    |                            |
| THA (>70years)             | 0.7** (0.3-1.5)    | Almustafa et al (2018) (1) |
| TKA (>70years)             | 1.7** (0.9-3.3)    | Almustafa et al (2018) (1) |
| Smoking status             | 0.16** (0.05-0.52) | Møller et al (2002) (2)    |
| BMI                        | 6.7* (NR)          | Namba et al (2005) (3)     |
|                            | 4.8** (1.9-12.0)   | Almustafa et al (2018) (1) |
|                            | 2.53* (1.25-5.13)  | Chen et al (2013) (4)      |
| Immunological disorder     | -                  | <i>Clinical reasoning</i>  |
| NSAID's                    | -                  | <i>Clinical reasoning</i>  |
| Diabetes mellitus          | 1.90* (1.32-2.74)  | Podmore et al (2018) (5)   |
| Liver disease              | 2.46* (1.46-4.12)  | Podmore et al (2018) (5)   |
| Venous thromboembolism     |                    |                            |
| Age                        |                    |                            |
| THA(≥75years)              | 1.82* (1.15-2.87)  | Migita et al (2014) (6)    |
| TKA(≥75years)              | 1.30* (0.99-1.71)  | Migita et al (2014) (6)    |
| Sex                        |                    |                            |
| THA(female>risk)           | 2.31* (1.03-5.18)  | Migita et al (2014) (6)    |
| TKA(female>risk)           | 1.58* (1.08-2.31)  | Migita et al (2014) (6)    |
| Diabetes mellitus          | 1.26* (0.92-1.72)  | Podmore et al (2018) (5)   |
| (TKA)                      | 1.36* (1.07-1.72)  | Yang et al (2015) (7)      |
| Thromboembolic event (TKA) | 1.11* (0.36-3.46)  | Migita et al (2014) (6)    |
| Obesity                    |                    |                            |
| THA(BMI>30)                | 0.89* (0.36-2.20)  | Migita et al (2014) (6)    |
| TKA(BMI>30)                | 0.90* (0.58-1.38)  | Migita et al (2014) (6)    |
| Postoperative bleeding     |                    |                            |
| Age                        |                    |                            |
| THA(>70 years)             | 2.61** (1.50-4.53) | Quintero et al (2016) (8)  |

|                                                                               |                    |                            |
|-------------------------------------------------------------------------------|--------------------|----------------------------|
| TKA(>70years)                                                                 | 2.25** (1.03-4.94) | Quintero et al (2016) (8)  |
| BMI                                                                           | -                  | <i>Clinical reasoning</i>  |
| Heart disease                                                                 | -                  | <i>Univariate analysis</i> |
| Vitamin K antagonists                                                         | -                  | <i>Clinical reasoning</i>  |
| Smoking status                                                                | -                  | <i>Univariate analysis</i> |
| Luxation                                                                      |                    |                            |
| Age                                                                           | 1.27* (1.02-1.57)  | Kunutsor et al (2019) (9)  |
| Smoking status                                                                | 1.08* (0.96-1.21)  | Kunutsor et al (2019) (9)  |
| BMI                                                                           | 1.38* (1.03-1.85)  | Kunutsor et al (2019) (9)  |
| Rheumatoid arthritis                                                          | 1.50* (1.05-2.15)  | Kunutsor et al (2019) (9)  |
| Disease of the central nervous system                                         | 2.54* (1.86-3.48)  | Kunutsor et al (2019) (9)  |
| Delirium                                                                      |                    |                            |
| Age                                                                           | 2.20* (1.80-2.71)  | Huang et al (2019) (10)    |
| Disease of the central nervous system ( <i>dementia</i> )                     | 7.44* (3.54-14.60) | Huang et al (2019) (10)    |
| Heart disease ( <i>congestive</i> )                                           | 0.83* (0.39-1.61)  | Huang et al (2019) (10)    |
| Nerve damage                                                                  |                    |                            |
| Age (<45 vs 65-74)                                                            | 7.17* (1.17-44.00) | Shetty et al (2016) (11)   |
| BMI (<BMI >risk)                                                              | 0.96* (0.77-1.21)  | Kawano et al (2018) (12)   |
| Sex ( <i>female &gt; risk</i> )                                               | Not reported       | Shetty et al (2016) (11)   |
| Smoking status                                                                | 1.90* (1.06-3.38)  | Shetty et al (2016) (11)   |
| Dysplasia                                                                     | 3.69* (1.65-8.28)  | Farrell et al (2005) (13)  |
| *results reported as odds ratio (OR); ** results reported as risk ratio (RR). |                    |                            |

**eTable 3. Categorization of comorbidities**

| <b>Categorization of comorbidities</b> |                                                                                                                                                                                                                                                                                    |
|----------------------------------------|------------------------------------------------------------------------------------------------------------------------------------------------------------------------------------------------------------------------------------------------------------------------------------|
| <b>Comorbid category*</b>              | <b>Included comorbid conditions**</b>                                                                                                                                                                                                                                              |
| Bleeding diseases                      | Hemophilia                                                                                                                                                                                                                                                                         |
| Blood quality                          | Anemia                                                                                                                                                                                                                                                                             |
| Cancer                                 | Prostate cancer<br>Leukemia<br>Breast cancer<br>Lymph node cancer<br>Bowen's disease                                                                                                                                                                                               |
| Central nervous system                 | Parkinson's disease<br>Dementia<br>TIA<br>CVA                                                                                                                                                                                                                                      |
| Cognitive impairment                   | Down syndrome                                                                                                                                                                                                                                                                      |
| Diabetes mellitus                      | Diabetes mellitus                                                                                                                                                                                                                                                                  |
| Heart disease                          | Ischemia of the heart<br>Valve damage blood regurgitation<br>Valve damage reduced blood flow<br>Valve replacement<br>Cardiomyopathy decreased contraction<br>Cardiomyopathy decreased relaxation<br>Heart decompensation<br>Heart attack<br>Angina pectoris<br>Atrial fibrillation |
| High blood pressure                    | Hypertension                                                                                                                                                                                                                                                                       |
| Hyper hormonal                         | Hyper hormonal                                                                                                                                                                                                                                                                     |
| Hypo hormonal                          | Hypo hormonal                                                                                                                                                                                                                                                                      |

|                            |                                                                                                                                                      |
|----------------------------|------------------------------------------------------------------------------------------------------------------------------------------------------|
| Immunological disorder     | Scleroderma<br>Rheumatoid arthritis<br>Gout<br>Psoriasis<br>Artritides<br>Dermal barrier disease<br>General immune disorder<br>Organ transplantation |
| Inflammation               | Chronic bladder infection                                                                                                                            |
| Kidney disease             | Kidney insufficiency                                                                                                                                 |
| Liver disease              | Liver cirrhosis                                                                                                                                      |
| Lung disease               | Chronic bronchitis<br>Asthma<br>COPD<br>Emphysema<br>Dyspnea                                                                                         |
| Mood sickness              | Depression<br>Psychosis                                                                                                                              |
| Obesity                    | Obesity                                                                                                                                              |
| Peripheral nervous system  | Nerve compression<br>Lumbar vertebral stenosis                                                                                                       |
| Poor peripheral blood flow | Atherosclerosis<br>Claudication intermittent                                                                                                         |
| Thromboembolic event       | Deep venous thromboembolism<br>Pulmonary embolism                                                                                                    |

\* the comorbid categories are used for analysis.



1  
2  
3 \*\* comorbid conditions are depicted when the frequency was  $\geq 10$  or when the  
4  
5 comorbid condition was considered as a relevant comorbid condition in terms of  
6  
7  
8 outcome prediction.  
9  
10  
11  
12  
13  
14  
15  
16  
17  
18  
19  
20  
21  
22  
23  
24  
25  
26  
27  
28  
29  
30  
31  
32  
33  
34  
35  
36  
37  
38  
39  
40  
41  
42  
43  
44  
45  
46  
47  
48  
49  
50  
51  
52  
53  
54  
55  
56  
57  
58  
59  
60

For peer review only

**eTable 4. Categorization of drug groups**

| <b>Categorization of medication use</b> |                                                                                    |
|-----------------------------------------|------------------------------------------------------------------------------------|
| <b>Drug category</b>                    | <b>Drugs groups according to the Dutch pharmacotherapeutic compass (14)</b>        |
| Acenocoumarol                           | Acenocoumarol*                                                                     |
| Antifibrinolytica                       | Antifibrinolytica                                                                  |
| Antimycotics                            | Antimycotic antibiotics<br>Others                                                  |
| Antiretroviral agents                   | Antiretroviral agents                                                              |
| Bisfosfonates                           | Bisfosfonates                                                                      |
| Colchicine group                        | Colchicine group                                                                   |
| Directly working oral anticoagulants    | Directly working oral anticoagulants                                               |
| DMARD's biologicals                     | Immunosuppressives selective<br>Immunosuppressives others                          |
| Factors in blood coagulance             | Factors in blood coagulance                                                        |
| Fenprocoumon                            | Fenprocoumon*                                                                      |
| Imidazoles                              | Cutane imidazoles<br>Others                                                        |
| Immunosuppressives                      | Interferons<br>Interleukin antagonists<br>Monoclonal antibodies                    |
| Local antibacterial agents              | Cutaneous<br>antibacterial agents<br>Ocular antibacterial agents                   |
| Local corticosteroids                   | Cutane corticosteroids<br>Nasal corticosteroids<br>Corticosteroides for inhalation |
| Low molecular weight heparins           | Low molecular weight heparins                                                      |
| Methotrexate                            | Methotrexate                                                                       |

|                                 |                                                                                                                                                                                                                                           |
|---------------------------------|-------------------------------------------------------------------------------------------------------------------------------------------------------------------------------------------------------------------------------------------|
| NSAID's**                       | Coxib's<br>Others                                                                                                                                                                                                                         |
| Oncology related detoxificants  | Oncology related detoxificants                                                                                                                                                                                                            |
| Salicylates                     | Analgetic salicylates<br>Trombocytic salicylates                                                                                                                                                                                          |
| Statins                         | Statins                                                                                                                                                                                                                                   |
| Systemic antibacterial agents   | Cephalosporins<br>Macrolides<br>Penicillin's<br>Tetracyclines<br>Carbapenems<br>Ceftriaxone<br>Glycopeptides<br>Aminoglycosides<br>Rifamycins tuberculose<br>Sulfonamides and trimethoprimides<br>Triazoles<br>Fluoroquinolones<br>Others |
| Thrombocyte-aggregationblockers | P2y12 blockers<br>Others                                                                                                                                                                                                                  |
| Xanthineoxidase inhibitor       | Xanthineoxidase inhibitor                                                                                                                                                                                                                 |

\* according the Dutch pharmacotherapeutic compass, acenocoumarol and fenprocoumon belong to the drug group 'vitamin k antagonists'. Based on expert opinion, acenocoumarol and fenprocoumon were included separately in the analysis because of the differences in half-life.

\*\* Non-Steroidal Anti-Inflammatory Drugs

**eTable 5. Original prediction models and adjusted coefficients**

## Prediction model for estimation of risk for surgical site infection

| Variable                                                                                                                                                                                                                                                                                                                                                                                                                                                                                                                                                                     | Regression coefficient | Regression coefficient<br>(adjusted with SF)* | Odds Ratio<br>(95% CI)   |
|------------------------------------------------------------------------------------------------------------------------------------------------------------------------------------------------------------------------------------------------------------------------------------------------------------------------------------------------------------------------------------------------------------------------------------------------------------------------------------------------------------------------------------------------------------------------------|------------------------|-----------------------------------------------|--------------------------|
| Intercept                                                                                                                                                                                                                                                                                                                                                                                                                                                                                                                                                                    | -7.305                 | -7.272                                        | -                        |
| Age (years)                                                                                                                                                                                                                                                                                                                                                                                                                                                                                                                                                                  | 0.031                  | 0.031                                         | 1.032<br>(1.005-1.059)   |
| BMI (kg/m <sup>2</sup> )                                                                                                                                                                                                                                                                                                                                                                                                                                                                                                                                                     | -0.002                 | -0.002                                        | 0.998<br>(0.937-1.063)   |
| Smoking status (yes/no)                                                                                                                                                                                                                                                                                                                                                                                                                                                                                                                                                      | 0.769                  | 0.757                                         | 2.145<br>(0.883-5.213)   |
| Immunological disorder<br>(yes/no)                                                                                                                                                                                                                                                                                                                                                                                                                                                                                                                                           | 0.905                  | 0.891                                         | 2.474<br>(1.186-5.158)   |
| Diabetes mellitus (yes/no)                                                                                                                                                                                                                                                                                                                                                                                                                                                                                                                                                   | 0.918                  | 0.904                                         | 2.494<br>(1.125-5.529)   |
| Liver disease (yes/no)                                                                                                                                                                                                                                                                                                                                                                                                                                                                                                                                                       | 2.382                  | 2.345                                         | 10.659<br>(2.441-46.555) |
| NSAID's (yes/no)                                                                                                                                                                                                                                                                                                                                                                                                                                                                                                                                                             | 0.629                  | 0.619                                         | 1.877<br>(0.946-3.725)   |
| <p>To calculate the absolute risk of surgical site infection: <math>P_{(\text{surgical site infection})} = 1 / (1 + e^{-\text{linear part}}) \times 100\%</math>;</p> <p>Linear part = <math>-7.272 + (0.031 \times \text{age} - 0.002 \times \text{BMI} + 0.757 \times \text{smoking status} + 0.891 \times \text{immunological disorder} + 0.904 \times \text{diabetes mellitus} + 2.345 \times \text{liver disease} + 0.619 \times \text{NSAID's})</math>.</p> <p>*adjustment for over-fitting by shrinkage factor (SF) (SF = 0.984); the intercept was re-estimated.</p> |                        |                                               |                          |

## Prediction model for estimation of risk for venous thromboembolism

| Variable    | Regression coefficient | Regression coefficient<br>(adjusted with SF)* | Odds Ratio<br>(95% CI) |
|-------------|------------------------|-----------------------------------------------|------------------------|
| Intercept   | -4.764                 | -4.790                                        | -                      |
| Age (years) | -0.009                 | -0.008                                        | 0.991                  |

|                                                                                                                                                                                                                                                                                                                                                    |        |        |                         |
|----------------------------------------------------------------------------------------------------------------------------------------------------------------------------------------------------------------------------------------------------------------------------------------------------------------------------------------------------|--------|--------|-------------------------|
|                                                                                                                                                                                                                                                                                                                                                    |        |        | (0.966-1.018)           |
| Gender (male/female)                                                                                                                                                                                                                                                                                                                               | -0.170 | -0.168 | 0.844<br>(0.377-1.888)  |
| Obesity (yes/no)                                                                                                                                                                                                                                                                                                                                   | 1.396  | 1.376  | 4.040<br>(1.462-11.159) |
| Diabetes mellitus (yes/no)                                                                                                                                                                                                                                                                                                                         | 0.841  | 0.829  | 2.317<br>(0.870-6.173)  |
| Thromboembolic event<br>(yes/no)                                                                                                                                                                                                                                                                                                                   | 1.523  | 1.501  | 4.586<br>(1.521-13.826) |
| To calculate the absolute risk of venous thromboembolism: $P_{(\text{venous thromboembolism})} = 1/(1+e^{-\text{linear part}}) \times 100\%$ ; Linear part = $-4.790 + (-0.008 \times \text{age} - 0.168 \times \text{gender} + 1.376 \times \text{obesity} + 0.829 \times \text{diabetes mellitus} + 1.501 \times \text{thromboembolic event})$ . |        |        |                         |
| *adjustment for over-fitting by shrinkage factor (SF) (SF = 0.986); the intercept was re-estimated.                                                                                                                                                                                                                                                |        |        |                         |

#### Prediction model for estimation of risk for postoperative bleeding.

| Variable                                                                                                                                       | Regression coefficient | Regression coefficient<br>(adjusted with SF)* | Odds Ratio<br>(95% CI) |
|------------------------------------------------------------------------------------------------------------------------------------------------|------------------------|-----------------------------------------------|------------------------|
| Intercept                                                                                                                                      | -7.182                 | -7.172                                        | -                      |
| Age (years)                                                                                                                                    | 0.033                  | 0.033                                         | 1.034<br>(1.006-1.062) |
| BMI (kg/m <sup>2</sup> )                                                                                                                       | 0.012                  | 0.012                                         | 1.012<br>(0.954-1.073) |
| Smoking status (yes/no)                                                                                                                        | -0.023                 | -0.023                                        | 0.952<br>(0.336-2.701) |
| Heart disease (yes/no)                                                                                                                         | 0.737                  | 0.729                                         | 2.086<br>(1.040-4.183) |
| Vitamin K antagonist use<br>(yes/no)                                                                                                           | 0.796                  | 0.787                                         | 2.220<br>(1.022-4.821) |
| To calculate the absolute risk of postoperative bleeding: $P_{(\text{postoperative bleeding})} = 1/(1+e^{-\text{linear part}}) \times 100\%$ ; |                        |                                               |                        |

Linear part =  $-7.172 + (0.033 \times \text{age} + 0.012 \times \text{BMI} - 0.023 \times \text{smoking status} + 0.729 \times \text{heart disease} + 0.787 \times \text{vitamin K antagonist use})$ .

\*adjustment for over-fitting by shrinkage factor (SF) (SF = 0.989); the intercept was re-estimated.

### Prediction model for estimation of risk for luxation.

| Variable                                      | Regression coefficient | Regression coefficient<br>(adjusted with SF)* | Odds Ratio<br>(95% CI) |
|-----------------------------------------------|------------------------|-----------------------------------------------|------------------------|
| Intercept                                     | -5.976                 | -5.800                                        | -                      |
| Age (years)                                   | 0.014                  | 0.013                                         | 1.014<br>(0.991-1.038) |
| BMI (kg/m <sup>2</sup> )                      | 0.022                  | 0.021                                         | 1.023<br>(0.951-1.099) |
| Smoking status (yes/no)                       | 0.521                  | 0.491                                         | 1.667<br>(0.651-4.268) |
| Rheumatoid arthritis<br>(yes/no)              | 0.572                  | 0.538                                         | 1.752<br>(0.408-7.530) |
| Disease of central nervous<br>system (yes/no) | 0.113                  | 0.106                                         | 1.113<br>(0.324-3.822) |

To calculate the absolute risk of luxation:  $P_{(\text{luxation})} = 1 / (1 + e^{-\text{linear part}}) \times 100\%$ ;

Linear part =  $-5.800 + (0.013 \times \text{age} + 0.021 \times \text{BMI} + 0.491 \times \text{smoking status} + 0.538 \times \text{rheumatoid arthritis} + 0.106 \times \text{disease of central nervous system})$ .

\*adjustment for over-fitting by shrinkage factor (SF) (SF = 0.941); the intercept was re-estimated.

### Prediction model for estimation of risk for delirium.

| Variable               | Regression coefficient | Regression coefficient<br>(adjusted with SF)* | Odds Ratio<br>(95% CI) |
|------------------------|------------------------|-----------------------------------------------|------------------------|
| Intercept              | -14.368                | -14.307                                       | -                      |
| Age (years)            | 0.129                  | 0.127                                         | 1.137<br>(1.067-1.212) |
| Heart disease (yes/no) | 0.351                  | 0.348                                         | 1.422                  |

|                                                                                                                                                                                                                                                                                                                                                                                                                   |       |       |                        |
|-------------------------------------------------------------------------------------------------------------------------------------------------------------------------------------------------------------------------------------------------------------------------------------------------------------------------------------------------------------------------------------------------------------------|-------|-------|------------------------|
|                                                                                                                                                                                                                                                                                                                                                                                                                   |       |       | (0.590-3.428)          |
| Disease of central nervous system (yes/no)                                                                                                                                                                                                                                                                                                                                                                        | 0.904 | 0.898 | 2.465<br>(0.936-6.490) |
| <p>To calculate the absolute risk of delirium: <math>P_{(\text{delirium})} = 1/(1+e^{-\text{linear part}}) \times 100\%</math>;</p> <p>Linear part = <math>-14.307 + (0.127 \times \text{age} + 0.348 \times \text{heart disease} + 0.898 \times \text{disease of central nervous system})</math>.</p> <p>*adjustment for over-fitting by shrinkage factor (SF) (SF = 0.993); the intercept was re-estimated.</p> |       |       |                        |

### Prediction model for estimation of risk for nerve damage.

| Variable                                                                                                                                                                                                                                                                                                                                                                                                                        | Regression coefficient | Regression coefficient<br>(adjusted with SF)* | Odds Ratio<br>(95% CI) |
|---------------------------------------------------------------------------------------------------------------------------------------------------------------------------------------------------------------------------------------------------------------------------------------------------------------------------------------------------------------------------------------------------------------------------------|------------------------|-----------------------------------------------|------------------------|
| Intercept                                                                                                                                                                                                                                                                                                                                                                                                                       | -2.209                 | -2.250                                        | -                      |
| Age (years)                                                                                                                                                                                                                                                                                                                                                                                                                     | -0.052                 | -0.051                                        | 0.949<br>(0.926-0.974) |
| Gender (man/woman)                                                                                                                                                                                                                                                                                                                                                                                                              | -0.258                 | -0.254                                        | 0.772<br>(0.319-1.868) |
| Smoking status (yes/no)                                                                                                                                                                                                                                                                                                                                                                                                         | 0.580                  | 0.572                                         | 1.754<br>(0.510-6.029) |
| Dysplasia (yes/no)                                                                                                                                                                                                                                                                                                                                                                                                              | -0.009                 | -0.009                                        | 0.993<br>(0.217-4.552) |
| <p>To calculate the absolute risk of nerve damage: <math>P_{(\text{nerve damage})} = 1/(1+e^{-\text{linear part}}) \times 100\%</math>;</p> <p>Linear part = <math>-2.250 + (-0.051 \times \text{age} - 0.254 \times \text{gender} + 0.572 \times \text{smoking status} - 0.009 \times \text{dysplasia})</math>.</p> <p>*adjustment for over-fitting by shrinkage factor (SF) (SF = 0.987); the intercept was re-estimated.</p> |                        |                                               |                        |

**eFigure 1. ROC curves and Calibration plots**

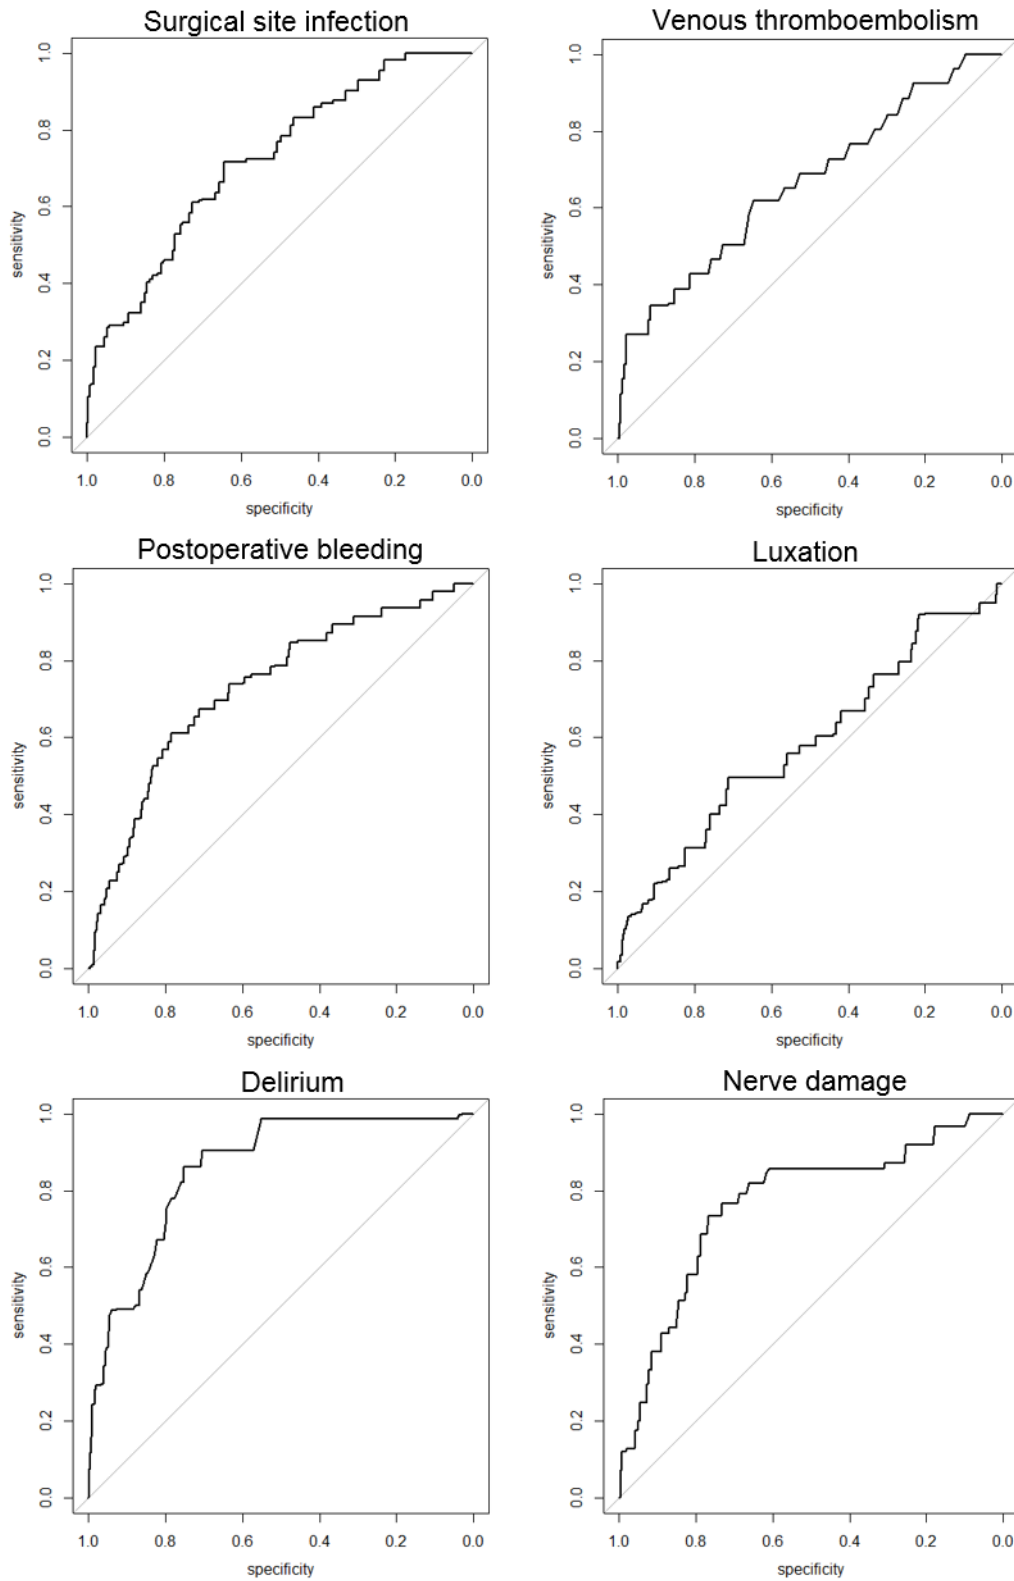

eFigure 1.1. Receiver Operating Characteristic curves of the prediction models for surgical site infection, venous thromboembolism, postoperative bleeding, luxation, delirium and nerve damage



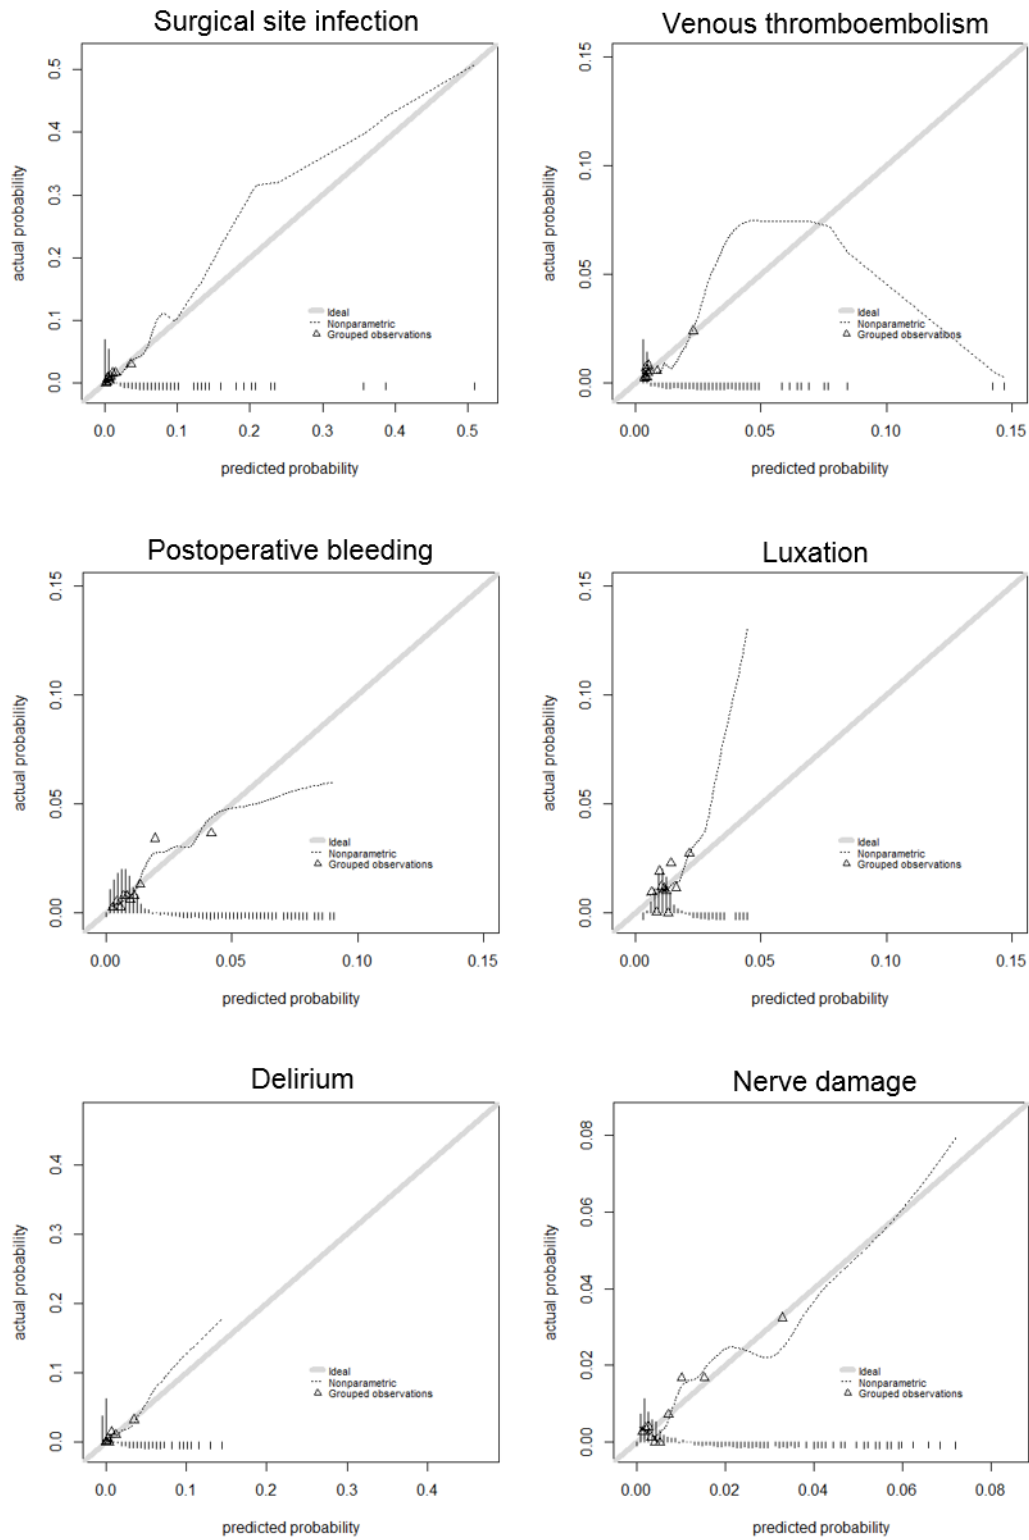

eFigure 1.2. Calibration plots with actual probability against the predicted probability for the models for surgical site infection, venous thromboembolism, postoperative bleeding, luxation, delirium and nerve damage. The triangles indicate quantiles ( $g=10$ ) of patients with a similar predicted probability of success. The grey diagonal line represents perfect agreement between predicted and actual probability

## REFERENCES

1. Almustafa MA, Ewen AM, Deakin AH, Picard F, Clarke JV, Mahmood FF. Risk Factors for Surgical Site Infection Following Lower Limb Arthroplasty: A Retrospective Cohort Analysis of 3932 Lower Limb Arthroplasty Procedures in a High Volume Arthroplasty Unit. *The Journal of Arthroplasty*. 2018;33(6):1861-7.
2. Moller AM, Villebro N, Pedersen T, Tonnesen H. Effect of preoperative smoking intervention on postoperative complications: a randomised clinical trial. *Lancet*. 2002;359(9301):114-7.
3. Namba RS, Paxton L, Fithian DC, Stone ML. Obesity and perioperative morbidity in total hip and total knee arthroplasty patients. *J Arthroplasty*. 2005;20(7 Suppl 3):46-50.
4. Chen J, Cui Y, Li X, Miao X, Wen Z, Xue Y, et al. Risk factors for deep infection after total knee arthroplasty: a meta-analysis. *Arch Orthop Trauma Surg*. 2013;133(5):675-87.
5. Podmore B, Hutchings A, van der Meulen J, Aggarwal A, Konan S. Impact of comorbid conditions on outcomes of hip and knee replacement surgery: a systematic review and meta-analysis. *BMJ Open*. 2018;8(7):e021784.
6. Migita K, Bito S, Nakamura M, Miyata S, Saito M, Kakizaki H, et al. Venous thromboembolism after total joint arthroplasty: results from a Japanese multicenter cohort study. *Arthritis Res Ther*. 2014;16(4):R154-R.
7. Yang G, Meng F, Liu Y, Kong L, Shen Y. Diabetes mellitus and risk of deep vein thrombosis after total knee replacement: a meta-analysis of cohort studies. *Int J Clin Exp Med*. 2015;8(6):9086-92.

- 1  
2  
3 8. Quintero JI, Cardenas LL, Navas M, Bautista MP, Bonilla GA, Llinas AM.  
4  
5 Primary Joint Arthroplasty Surgery: Is the Risk of Major Bleeding Higher in Elderly  
6  
7 Patients? A Retrospective Cohort Study. *J Arthroplasty*. 2016;31(10):2264-8.  
8  
9
- 10 9. Kunutsor SK, Barrett MC, Beswick AD, Judge A, Blom AW, Wylde V, et al. Risk  
11  
12 factors for dislocation after primary total hip replacement: a systematic review and  
13  
14 meta-analysis of 125 studies involving approximately five million hip replacements. *The*  
15  
16 *Lancet Rheumatology*. 2019;1(2):e111-e21.  
17  
18
- 19 10. Huang J, Sprung J, Weingarten TN. Delirium following total joint replacement  
20  
21 surgery. *Bosn J Basic Med Sci*. 2019;19(1):81-5.  
22  
23
- 24 11. Shetty T, Nguyen JT, Wu A, Sasaki M, Bogner E, Burge A, et al. Risk Factors  
25  
26 for Nerve Injury After Total Hip Arthroplasty: A Case-Control Study. *J Arthroplasty*.  
27  
28 2019;34(1):151-6.  
29  
30
- 31 12. Kawano S, Sonohata M, Kitajima M, Mawatari M. Risk Factors for the  
32  
33 Development of Nerve Palsy Following Primary Total Hip Arthroplasty. *Open Orthop*  
34  
35 *J*. 2018;12:164-72.  
36  
37
- 38 13. Farrell CM, Springer BD, Haidukewych GJ, Morrey BF. Motor nerve palsy  
39  
40 following primary total hip arthroplasty. *J Bone Joint Surg Am*. 2005;87(12):2619-25.  
41  
42
- 43 14. ZorginstituutNederland. Farmacotherapeutisch Kompas. 2020 [Available from:  
44  
45 <https://farmacotherapeutischkompas.nl>.  
46  
47  
48  
49  
50  
51  
52  
53  
54  
55  
56  
57  
58  
59  
60

1  
2  
3  
4  
5  
6  
7  
8  
9  
10  
11  
12  
13  
14  
15  
16  
17  
18  
19  
20  
21  
22  
23  
24  
25  
26  
27  
28  
29  
30  
31

| Input variables*                                       |                         |                         |                        |                        |                        |                        |          |                   |          |                   |              |                   |        |        |
|--------------------------------------------------------|-------------------------|-------------------------|------------------------|------------------------|------------------------|------------------------|----------|-------------------|----------|-------------------|--------------|-------------------|--------|--------|
|                                                        | Surgical site infection |                         | Venous thromboembolism |                        | Postoperative bleeding |                        | Luxation |                   | Delirium |                   | Nerve damage |                   |        |        |
| Age (years)                                            | 65                      | 0,031                   | 2,015                  | -0,008                 | -0,52                  | 0,033                  | 2,145    | 0,013             | 0,845    | 0,127             | 8,255        | -0,051            | -3,315 |        |
| Gender (male/female)                                   | 1                       |                         | 0                      | -0,168                 | -0,168                 |                        | 0        |                   | 0        |                   | 0            | -0,254            | -0,254 |        |
| BMI (kg/m2)                                            | 30                      | -0,002                  | -0,06                  |                        | 0                      | 0,012                  | 0,36     | 0,021             | 0,63     |                   | 0            |                   | 0      |        |
| Obesity (yes/no)                                       | 0                       |                         | 0                      | 1,376                  | 0                      |                        | 0        |                   | 0        |                   | 0            |                   | 0      |        |
| Smoking status (yes/no)                                | 0                       | 0,757                   | 0                      |                        | 0                      | -0,023                 |          | 0,491             | 0        |                   | 0            | 0,572             | 0      |        |
| Lung disease (yes/no)                                  | 0                       |                         | 0                      |                        | 0                      |                        | 0        |                   | 0        |                   | 0            |                   | 0      |        |
| Immunological disorder (yes/no)                        | 0                       | 0,891                   | 0                      |                        | 0                      |                        | 0        |                   | 0        |                   | 0            |                   | 0      |        |
| Rheumatoid arthritis (yes/no)                          | 0                       |                         | 0                      |                        | 0                      |                        | 0,538    |                   | 0        |                   | 0            |                   | 0      |        |
| Diabetes mellitus (yes/no)                             | 0                       | 0,904                   | 0                      | 0,829                  | 0                      |                        | 0        |                   | 0        |                   | 0            |                   | 0      |        |
| Liver disease (yes/no)                                 | 0                       | 2,345                   | 0                      |                        | 0                      |                        | 0        |                   | 0        |                   | 0            |                   | 0      |        |
| Heart disease (yes/no)                                 | 0                       |                         | 0                      |                        | 0                      | 0,729                  |          |                   | 0        | 0,348             | 0            |                   | 0      |        |
| Disease of central nervous system (yes/no)             | 0                       |                         | 0                      |                        | 0                      |                        | 0,106    |                   | 0        | 0,898             | 0            |                   | 0      |        |
| Thromboembolic event (yes/no)                          | 0                       |                         | 0                      | 1,501                  | 0                      |                        | 0        |                   | 0        |                   | 0            |                   | 0      |        |
| Dysplasia (yes/no)                                     | 0                       |                         | 0                      |                        | 0                      |                        | 0        |                   | 0        |                   | 0            | -0,009            | 0      |        |
| Vitamin K antagonist use (yes/no)                      | 0                       |                         | 0                      |                        | 0                      | 0,787                  |          |                   | 0        |                   | 0            |                   | 0      |        |
| NSAID use (yes/no)                                     | 0                       | 0,619                   | 0                      |                        | 0                      |                        | 0        |                   | 0        |                   | 0            |                   | 0      |        |
|                                                        |                         | -7,272                  | 1,955                  | -4,79                  | -0,688                 | -7,172                 | 2,505    | -5,864            | 1,475    | -4,389            | -14,307      | 8,255             | -2,25  | -3,569 |
|                                                        |                         |                         | -5,317                 |                        | -5,478                 |                        | -4,667   |                   |          |                   |              | -6,052            |        | -5,819 |
| <b>Predicted probability for residual symptoms (%)</b> |                         | <b>0,48834885</b>       |                        | <b>0,41602963</b>      |                        | <b>0,93128835</b>      |          | <b>1,22609394</b> |          | <b>0,23476267</b> |              | <b>0,29617761</b> |        |        |
|                                                        |                         | surgical site infection |                        | venous thromboembolism |                        | postoperative bleeding |          | luxation          |          | delirium          |              | nerve damage      |        |        |

\* Age: in years, Gender: male scored as 1 and female scored as 2, BMI: in kg/m2, Obesity: no scored as 0 and yes as 1, Smoking status: no scored as 0 and yes as 1, Lung disease: no scored as 0 and yes as 1, Immunological disorder: no scored as 0 and yes as 1

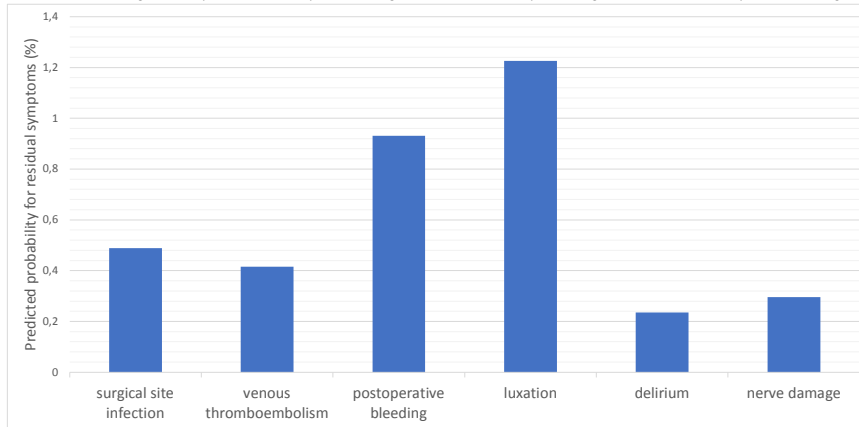

1  
2  
3  
4  
5  
6  
7  
8  
9  
10  
11  
12  
13  
14  
15  
16  
17  
18  
19  
20  
21  
22  
23  
24  
25  
26  
27  
28  
29  
30  
31

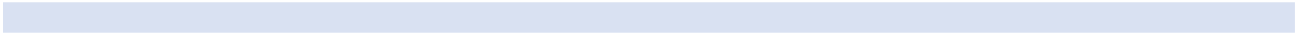

For peer review only

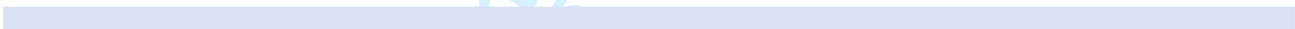

1, Rheumatoid arthritis: no scored as 0 and yes as 1, Diabetes mellitus: no scored as 0 and yes as 1, Liver disease: no scored as 0 and yes as 1, Heart disease: no scored as 0 and yes as 1, Disease of the central nervous system: no scored as 0 and yes as 1, Thrombo

1  
2  
3  
4  
5  
6  
7  
8  
9  
10  
11  
12  
13  
14  
15  
16  
17  
18  
19  
20  
21  
22  
23  
24  
25  
26  
27  
28  
29  
30  
31

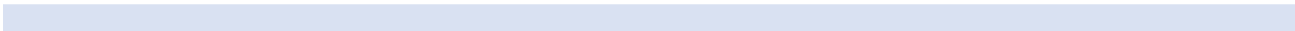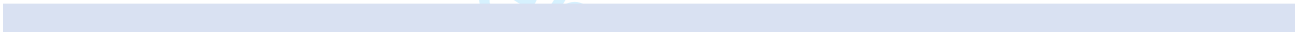

embolic event: no scored as 0 and yes as 1, Dysplasia: no scored as 0 and yes as 1, Vitamin K antagonists use: no scored as 0 and yes as 1, NSAID's: no scored as 0 and yes as 1

1  
2  
3  
4  
5  
6  
7  
8  
9  
10  
11  
12  
13  
14  
15  
16  
17  
18  
19  
20  
21  
22  
23  
24  
25  
26  
27  
28  
29  
30  
31

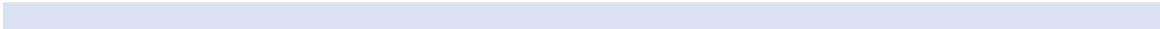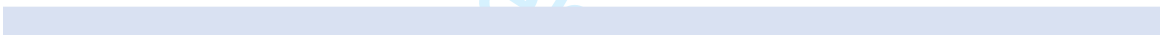

For peer review only

## Research checklist. TRIPOD Checklist: Prediction Model Development and Validation

| Section/Topic             | Item |     | Checklist item                                                                                                                                                                                   | Page |
|---------------------------|------|-----|--------------------------------------------------------------------------------------------------------------------------------------------------------------------------------------------------|------|
| <b>Title and abstract</b> |      |     |                                                                                                                                                                                                  |      |
| Title                     | 1    | D;V | Identify the study as developing and/or validating a multivariable prediction model, the target population, and the outcome to be predicted.                                                     | 1    |
| Abstract                  | 2    | D;V | Provide a summary of objectives, study design, setting, participants, sample size, predictors, outcome, statistical analysis, results, and conclusions.                                          | 3    |
| <b>Introduction</b>       |      |     |                                                                                                                                                                                                  |      |
| Background and objectives | 3a   | D;V | Explain the medical context (including whether diagnostic or prognostic) and rationale for developing or validating the multivariable prediction model, including references to existing models. | 5-6  |
|                           | 3b   | D;V | Specify the objectives, including whether the study describes the development or validation of the model or both.                                                                                | 6    |
| <b>Methods</b>            |      |     |                                                                                                                                                                                                  |      |
| Source of data            | 4a   | D;V | Describe the study design or source of data (e.g., randomized trial, cohort, or registry data), separately for the development and validation data sets, if applicable.                          | 7    |
|                           | 4b   | D;V | Specify the key study dates, including start of accrual; end of accrual; and, if applicable, end of follow-up.                                                                                   | 7    |
| Participants              | 5a   | D;V | Specify key elements of the study setting (e.g., primary care, secondary care, general population) including number and location of centres.                                                     | 7    |
|                           | 5b   | D;V | Describe eligibility criteria for participants.                                                                                                                                                  | 7-8  |
|                           | 5c   | D;V | Give details of treatments received, if relevant.                                                                                                                                                | 7-8  |
| Outcome                   | 6a   | D;V | Clearly define the outcome that is predicted by the prediction model, including how and when assessed.                                                                                           | 8    |
|                           | 6b   | D;V | Report any actions to blind assessment of the outcome to be predicted.                                                                                                                           | N/A  |
| Predictors                | 7a   | D;V | Clearly define all predictors used in developing or validating the multivariable prediction model, including how and when they were measured.                                                    | 8    |
|                           | 7b   | D;V | Report any actions to blind assessment of predictors for the outcome and other predictors.                                                                                                       | N/A  |
| Sample size               | 8    | D;V | Explain how the study size was arrived at.                                                                                                                                                       | 8    |
| Missing data              | 9    | D;V | Describe how missing data were handled (e.g., complete-case analysis, single imputation, multiple imputation) with details of any imputation method.                                             | 8-9  |



|                              |     |     |                                                                                                                                                                                                       |                          |
|------------------------------|-----|-----|-------------------------------------------------------------------------------------------------------------------------------------------------------------------------------------------------------|--------------------------|
| Statistical analysis methods | 10a | D   | Describe how predictors were handled in the analyses.                                                                                                                                                 | 9-10                     |
|                              | 10b | D   | Specify type of model, all model-building procedures (including any predictor selection), and method for internal validation.                                                                         | 9-10                     |
|                              | 10c | V   | For validation, describe how the predictions were calculated.                                                                                                                                         | 9-10                     |
|                              | 10d | D;V | Specify all measures used to assess model performance and, if relevant, to compare multiple models.                                                                                                   | 9-10                     |
|                              | 10e | V   | Describe any model updating (e.g., recalibration) arising from the validation, if done.                                                                                                               | N/A                      |
| Risk groups                  | 11  | D;V | Provide details on how risk groups were created, if done.                                                                                                                                             | N/A                      |
| Development vs. validation   | 12  | V   | For validation, identify any differences from the development data in setting, eligibility criteria, outcome, and predictors.                                                                         | N/A                      |
| <b>Results</b>               |     |     |                                                                                                                                                                                                       |                          |
| Participants                 | 13a | D;V | Describe the flow of participants through the study, including the number of participants with and without the outcome and, if applicable, a summary of the follow-up time. A diagram may be helpful. | 11, Figure 1             |
|                              | 13b | D;V | Describe the characteristics of the participants (basic demographics, clinical features, available predictors), including the number of participants with missing data for predictors and outcome.    | 11, Table 1              |
|                              | 13c | V   | For validation, show a comparison with the development data of the distribution of important variables (demographics, predictors and outcome).                                                        | N/A                      |
| Model development            | 14a | D   | Specify the number of participants and outcome events in each analysis.                                                                                                                               | 11, Table 1              |
|                              | 14b | D   | If done, report the unadjusted association between each candidate predictor and outcome.                                                                                                              | eTable 5                 |
| Model specification          | 15a | D   | Present the full prediction model to allow predictions for individuals (i.e., all regression coefficients, and model intercept or baseline survival at a given time point).                           | Table 2, eTable 5        |
|                              | 15b | D   | Explain how to use the prediction model.                                                                                                                                                              | Table 2, eTable 5, 11-12 |
| Model performance            | 16  | D;V | Report performance measures (with CIs) for the prediction model.                                                                                                                                      | Table 2, eTable 5        |
| Model-updating               | 17  | V   | If done, report the results from any model updating (i.e., model specification, model performance).                                                                                                   | N/A                      |
| <b>Discussion</b>            |     |     |                                                                                                                                                                                                       |                          |
| Limitations                  | 18  | D;V | Discuss any limitations of the study (such as nonrepresentative sample,                                                                                                                               | 18-20                    |

|                           |     |     |                                                                                                                                                |       |
|---------------------------|-----|-----|------------------------------------------------------------------------------------------------------------------------------------------------|-------|
|                           |     |     | few events per predictor, missing data).                                                                                                       |       |
| Interpretation            | 19a | V   | For validation, discuss the results with reference to performance in the development data, and any other validation data.                      | 18-20 |
|                           | 19b | D;V | Give an overall interpretation of the results, considering objectives, limitations, results from similar studies, and other relevant evidence. | 18-20 |
| Implications              | 20  | D;V | Discuss the potential clinical use of the model and implications for future research.                                                          | 18-20 |
| <b>Other information</b>  |     |     |                                                                                                                                                |       |
| Supplementary information | 21  | D;V | Provide information about the availability of supplementary resources, such as study protocol, Web calculator, and data sets.                  | 20    |
| Funding                   | 22  | D;V | Give the source of funding and the role of the funders for the present study.                                                                  | 21    |

\*Items relevant only to the development of a prediction model are denoted by D, items relating solely to a validation of a prediction model are denoted by V, and items relating to both are denoted D;V. We recommend using the TRIPOD Checklist in conjunction with the TRIPOD Explanation and Elaboration document.

# BMJ Open

## Development of prediction models for complications after primary total hip and knee arthroplasty: a single-centre retrospective cohort study in the Netherlands.

|                                 |                                                                                                                                                                                                                                                                                                                                                                          |
|---------------------------------|--------------------------------------------------------------------------------------------------------------------------------------------------------------------------------------------------------------------------------------------------------------------------------------------------------------------------------------------------------------------------|
| Journal:                        | <i>BMJ Open</i>                                                                                                                                                                                                                                                                                                                                                          |
| Manuscript ID                   | bmjopen-2022-062065.R2                                                                                                                                                                                                                                                                                                                                                   |
| Article Type:                   | Original research                                                                                                                                                                                                                                                                                                                                                        |
| Date Submitted by the Author:   | 11-Jul-2022                                                                                                                                                                                                                                                                                                                                                              |
| Complete List of Authors:       | Sweerts, Lieke; Radboudumc, Department of Orthopaedics; Radboudumc, IQ healthcare<br>Hoogeboom, Thomas J; Radboudumc, IQ healthcare<br>van Wessel, Thierry; Radboudumc, Department of Orthopaedics<br>Van der Wees, Philip; Radboudumc, IQ healthcare; Radboudumc, Department of Rehabilitation<br>van de Groes, Sebastiaan A.W.; Radboudumc, Department of Orthopaedics |
| <b>Primary Subject Heading</b>: | Patient-centred medicine                                                                                                                                                                                                                                                                                                                                                 |
| Secondary Subject Heading:      | Epidemiology                                                                                                                                                                                                                                                                                                                                                             |
| Keywords:                       | Hip < ORTHOPAEDIC & TRAUMA SURGERY, Knee < ORTHOPAEDIC & TRAUMA SURGERY, ORTHOPAEDIC & TRAUMA SURGERY                                                                                                                                                                                                                                                                    |
|                                 |                                                                                                                                                                                                                                                                                                                                                                          |

SCHOLARONE™  
Manuscripts



I, the Submitting Author has the right to grant and does grant on behalf of all authors of the Work (as defined in the below author licence), an exclusive licence and/or a non-exclusive licence for contributions from authors who are: i) UK Crown employees; ii) where BMJ has agreed a CC-BY licence shall apply, and/or iii) in accordance with the terms applicable for US Federal Government officers or employees acting as part of their official duties; on a worldwide, perpetual, irrevocable, royalty-free basis to BMJ Publishing Group Ltd ("BMJ") its licensees and where the relevant Journal is co-owned by BMJ to the co-owners of the Journal, to publish the Work in this journal and any other BMJ products and to exploit all rights, as set out in our [licence](#).

The Submitting Author accepts and understands that any supply made under these terms is made by BMJ to the Submitting Author unless you are acting as an employee on behalf of your employer or a postgraduate student of an affiliated institution which is paying any applicable article publishing charge ("APC") for Open Access articles. Where the Submitting Author wishes to make the Work available on an Open Access basis (and intends to pay the relevant APC), the terms of reuse of such Open Access shall be governed by a Creative Commons licence – details of these licences and which [Creative Commons](#) licence will apply to this Work are set out in our licence referred to above.

Other than as permitted in any relevant BMJ Author's Self Archiving Policies, I confirm this Work has not been accepted for publication elsewhere, is not being considered for publication elsewhere and does not duplicate material already published. I confirm all authors consent to publication of this Work and authorise the granting of this licence.

## Title Page

### (1) Title

Development of prediction models for complications after primary total hip and knee arthroplasty: a single-centre retrospective cohort study in the Netherlands.

### (2) Authors' names

Lieke Sweerts MSc<sup>1,2</sup>, Thomas J. Hoogeboom, PhD<sup>2</sup>, Thierry van Wessel MSc<sup>1</sup>, Philip J. van der Wees, PhD<sup>2,3</sup>, Sebastiaan A.W. van de Groes, MD, PhD, BEng<sup>1</sup>

### (3) Institution(s) at which the work was performed

### (4) Institution (and city and state or country) with which each author is affiliated

<sup>1</sup> Radboud university medical center, Radboud Institute for Health Sciences, Department of Orthopaedics, Nijmegen, The Netherlands

<sup>2</sup> Radboud university medical center, Radboud Institute for Health Sciences, IQ healthcare, Nijmegen, The Netherlands

<sup>3</sup> Radboud university medical center, Radboud Institute for Health Sciences, Department of Rehabilitation, Nijmegen, The Netherlands

### (5) Email addresses

[Lieke.Sweerts@radboudumc.nl](mailto:Lieke.Sweerts@radboudumc.nl)

[Thomas.Hoogeboom@radboudumc.nl](mailto:Thomas.Hoogeboom@radboudumc.nl)

[Thierry.vanWessel@radboudumc.nl](mailto:Thierry.vanWessel@radboudumc.nl)

[Philip.vanderWees@radboudumc.nl](mailto:Philip.vanderWees@radboudumc.nl)

[Sebastiaan.vandeGroes@radboudumc.nl](mailto:Sebastiaan.vandeGroes@radboudumc.nl)

### (6) Corresponding author and e-mail address

Lieke Sweerts, [Lieke.Sweerts@radboudumc.nl](mailto:Lieke.Sweerts@radboudumc.nl)

Postbus 9101

6500 HB Nijmegen

1  
2  
3 The Netherlands  
4  
5

6  
7 (7) Word count  
8

9 Abstract: 287

10 Manuscript: 3,465  
11  
12  
13  
14  
15  
16  
17  
18  
19  
20  
21  
22  
23  
24  
25  
26  
27  
28  
29  
30  
31  
32  
33  
34  
35  
36  
37  
38  
39  
40  
41  
42  
43  
44  
45  
46  
47  
48  
49  
50  
51  
52  
53  
54  
55  
56  
57  
58  
59  
60

For peer review only

## Abstract

*Objective.* The aim of the study was to develop prediction models for patients with THA and TKA to predict the risk for surgical complications based on personal factors, comorbidities, and medication use.

*Design.* Retrospective cohort study.

*Setting.* Tertiary Care in outpatient clinic of university medical center.

*Participants.* 3,776 patients with a primary THA or TKA between 2004 and 2018.

*Primary and secondary outcome measures.* Multivariable logistic regression models were developed for primary outcome surgical site infection (SSI), and secondary outcomes venous thromboembolism (VTE), postoperative bleeding (POB), luxation, delirium, and nerve damage (NER).

*Results.* For SSI, age, smoking status, BMI, presence of immunological disorder, diabetes mellitus, liver disease, and use of NSAID's were included. An area under the receiver operating characteristic curve (AUC) of 71.9%(95%CI=69.4-74.4) was found. For this model, liver disease showed to be the strongest predictor with an odds ratio of 10.7(95%CI=2.4-46.6). The models for POB and NER showed AUCs of 73.0%(95%CI=70.7-75.4) and 76.6%(95%CI=73.2-80.0), respectively. For delirium an AUC of 85.9%(95%CI=83.8-87.9) was found, and for the predictive algorithms for luxation and VTE we found least favorable results (AUC= 58.4%(95%CI=55.0-61.8) and 66.3%(95%CI=62.7-69.9)).

*Conclusions.* Discriminative ability was reasonable for SSI and predicted probabilities ranged from 0.01%-51.0%. We expect this to enhance shared decision making in considering THA or TKA since current counseling is predicated on population-based probability of risk, rather than using personalized prediction. We consider our models for SSI, delirium and NER appropriate for clinical use when taking under- and overestimation of predicted risk into account. For VTE and POB, caution concerning overestimation exceeding a predicted probability of 0.08 for VTE and 0.05 for POB should be taken into account. Furthermore, future studies should evaluate clinical impact and whether the models are feasible in an external population.

*Keywords.* total hip arthroplasty; total knee arthroplasty; surgical complications; prediction; prognosis; comorbidities; medication use

1  
2  
3 *Strengths and limitations of this study.*  
4

- 5 - This study included multivariable logistic regression models to predict postoperative  
6 complications after primary total hip- and knee arthroplasty based on personal factors,  
7 comorbidities, and medication use.  
8  
9  
10  
11 - The present study was conducted and reported according the transparent reporting of a  
12 multivariable prediction model for individual prognosis or diagnosis (TRIPOD) guidelines.  
13  
14 - Purposive selection of predictors by clinical reasoning and literature search.  
15  
16 - Limitations include only internal validation of the prediction models by bootstrapping.  
17  
18 - Used data were not primarily registered for research purposes, and therefore, their detail and  
19 accuracy could be less than optimal.  
20  
21  
22  
23  
24  
25  
26  
27  
28  
29  
30  
31  
32  
33  
34  
35  
36  
37  
38  
39  
40  
41  
42  
43  
44  
45  
46  
47  
48  
49  
50  
51  
52  
53  
54  
55  
56  
57  
58  
59  
60



## Introduction

Joint replacement is a recommended intervention for people with end stage hip or knee osteoarthritis.[1] Whether surgery is the best solution depends on many individual factors such as severity of the disease, level of experienced pain and discomfort, medication use, personal circumstances, comorbid diseases, and intended type of surgery.[2-4] Because the decision to have surgery or not is complex, a shared decision making (SDM) process is warranted. This process allows patients and clinicians to discuss treatment options consistent with the patient's values and preferences.[5]

Information on most likely prognosis is central in this dialogue as the clinician provides guidance and information about expected outcomes, including the risk on surgical complications, when facing the decision to pursue or forgo surgery. However, providing personalized information about the risk on surgical complications, based on personal characteristics of the patient, is challenging. Available evidence often consists of average outcomes and current guidelines on prediction of outcome still recommend counselling predicated on population-based probability of risk, rather than using personalized prediction.[6] This is remarkable, as discussing potential personal risks is an important aspect of SDM.[7, 8]

To overcome this problem, models that can predict postoperative complications are frequently developed and applied. Several universal surgical prediction models have already been developed based on a big national database.[9] However, before applying these models to orthopedic surgical procedures, performance and accuracy on the specific surgical field needs to be determined. For total joint arthroplasty, this is performed by Trickey et al.[10] As shown by Trickey et al., and others, patients at risk of not benefitting from total hip- or total knee arthroplasty (THA or TKA) can be identified using prediction models based on preoperative data like demographic factors, and pain scores, and physical functioning measured with Patient Reported Outcome Measures (PROMs).[10-13] Another study developed a preoperative prediction model to predict residual complaints on pain, functional outcome and treatment success for individual patients after TKA.[14] Also useful electronic risk calculators predicting complications and mortality for patients and clinicians are available for specific populations.[15-17] In one study, data of patients registered in the Medicare database, the federal health insurance program for individuals aged  $\geq 65$  years, are used for development of a risk calculator. However, the exact patient characteristics of the study population are not reported and the effect of the predictors remain unclear.[16] Harris et al. developed prediction models with machine learning

1  
2  
3 techniques models to determine demographic and clinical predictors for prediction of postoperative  
4 complications and mortality. The authors were able to identify predictor variables for their three most  
5 accurate models predicting a postoperative renal complication, cardiac complication, and death.  
6  
7 However, used predictor variables in the models can only be found for their three most accurate  
8  
9 outcomes.[17] Further research is warranted to identify relevant predictors for different postoperative  
10  
11 outcomes. In another study, regression models are based on the results of univariate analyses on a  
12  
13 broad range of data as demographics, comorbidities, and laboratory, or test values of a mainly male  
14  
15 Veteran population, and the authors reported suboptimal performance scores for prediction of most  
16  
17 outcomes.[15] Generalizability of prediction models based on specific patient populations may be  
18  
19 limited, and further evaluation of potential risk factors is needed to validate prediction models for  
20  
21 complications after primary total hip- and knee replacement.  
22  
23

24 As it is known from literature that personal factors including demographic characteristics and  
25  
26 comorbidities have an impact on surgical complications,[3] these assumed caused relationships might  
27  
28 therefore serve as basis for a risk prediction model. Therefore, the aim of this study is to develop a  
29  
30 prediction model for clinicians and patients with hip- or knee osteoarthritis considering surgery, by  
31  
32 predicting risk for surgical complications based on personal factors, comorbidities and medication use.  
33  
34  
35  
36  
37  
38  
39  
40  
41  
42  
43  
44  
45  
46  
47  
48  
49  
50  
51  
52  
53  
54  
55  
56  
57  
58  
59  
60

## Methods

### *Study design and setting*

For this retrospective cohort study, we established a cohort of patients who underwent primary THA or TKA between 2004 and 2018 at the Orthopedic department of Radboud university medical center Nijmegen, the Netherlands. Datasets were merged into one centralized database based on patient number, birthdate and date of surgery.

This study was performed and reported in line with transparent reporting of a multivariable prediction model for individual prognosis or diagnosis (TRIPOD) guidelines.[18]

### *Data collection*

Data used for this study were extracted from (electronic) medical records of Radboudumc, Dutch Arthroplasty Register (LROI), and Radboudumc registry of complications. We primarily extracted comorbidities and medication use from medical records. These data were extracted based on coding and were obtained by three researchers (LS, TW and AT) by use of a standardized operating procedure, and stored in a centralized platform (Castor Electronic Data Capture (EDC)).[19] Data about patient characteristics like age, sex, BMI, smoking status, American Society of Anesthesiologists (ASA) classification and diagnosis for surgery were extracted from LROI. Furthermore, date of surgery, type of surgery (primary or revision), surgery side, and type of implant were extracted.[20] From the register of complications we extracted all surgeries and complications which occurred within one year after THA or TKA.[21] In this registry, surgery related orthopedic complications were registered as well as other medical complications.[22] All complications were registered by location code combined with a code for the nature of the complication.[21] Some registrations were unclear and could refer to one of predefined complications and were therefore checked in medical records by LS. For all included location- and nature of complication codes per surgical complication, see eTable 1.

### *Inclusion and exclusion criteria*

Patients were eligible for inclusion in the cohort if the surgery concerned primary THA or TKA. We defined primary THA or TKA as the first time a total prosthesis is placed. Revision arthroplasty was defined as any change (replacement, removal, or addition) of one or several components of the joint

1  
2  
3 prosthesis.[20] We expected revision arthroplasty to influence risk for complications negatively,  
4 therefore revision arthroplasty was excluded for this study.  
5  
6  
7

#### 8 9 *Outcome* (dependent variables)

10 Prediction models were developed over the pooled THA and TKA data for six predefined surgical  
11 complications. Primary outcome was surgical site infection (SSI), and secondary outcomes included  
12 venous thromboembolism (VTE), postoperative bleeding (POB), luxation, delirium, and nerve damage  
13 (NER). All prediction models were developed based on primary THA and TKA data, except for the  
14 models for luxation and NER which were developed based on primary THA data. These surgical  
15 complications are uncommon in TKA.  
16  
17  
18  
19  
20  
21  
22  
23

#### 24 *Predictors* (independent variables)

25  
26 In total sixteen predictor candidates were selected based on evidence from previous reports and clinical  
27 reasoning in relation to the outcomes. These included patient characteristics, comorbidities, and  
28 medication use (as specified in eTable 2 and 3). Note that we made a purposive selection from the  
29 sixteen predictors candidates to serve as predictors for the different surgical complications.  
30  
31  
32

33 Comorbidities extracted from medical records were categorized according to the English National Health  
34 Service (NHS). The NHS considered these categories relevant comorbid categories in terms of outcome  
35 prediction.[3] Medication use was reduced to the active substance of the drug and was categorized to  
36 drug groups according the Dutch pharmacotherapeutic compass.[23]  
37  
38  
39  
40  
41  
42  
43

#### 44 *Sample size*

45 It is recommended that at least five events are collected for each predictor that is evaluated in  
46 multivariable regression analysis.[24, 25] An event was defined as the least frequent outcome status,  
47 which in our case was the presence of surgical complication. In the Netherlands, the estimated risk of a  
48 complication like SSI is 3%[26]; therefore, in order to develop a model with six predictors, at least 30  
49 events were required, and so a sample size of at least 1000 patients was required.  
50  
51  
52  
53  
54  
55

#### 56 *Missing data*

57  
58  
59  
60

1  
2  
3 Data were checked for completeness by investigating patterns of missingness to assess presence of a  
4 nonrandom element. Incomplete data were double checked. Missing data were imputed using multiple  
5 imputation, as the omission of patients who have one or more predictor variables missing from analysis  
6  
7 can cause considerable loss of precision and might bias the results.[27, 28] The number of imputations  
8  
9 was set to ten. The imputation was checked for accuracy by visual inspection and frequencies.  
10  
11  
12

### 13 14 *Statistical analysis methods*

#### 15 16 Model development

17  
18 Evidence from literature, clinical reasoning and eyeballing guided selection of predictors to be included  
19  
20 in the models. Eyeballing was done by evaluation of potential higher frequencies of predictors in relation  
21  
22 to the outcome.[29] All selected predictors were entered into a multivariable logistic regression model,  
23  
24 using the occurrence of a surgical complication as outcome variable. The prediction model was pooled  
25  
26 over the imputed datasets.[30]  
27  
28

#### 29 30 Internal validation

31  
32 To reduce risk of overfitting, we internally validated the model using bootstrapping. In this step, B-  
33  
34 bootstrap samples of B=1000 were drawn with replacement from original data, which reflects drawing  
35  
36 samples from underlying population. Due to the drawing with replacement, a bootstrapped dataset  
37  
38 allows for containing the same original cases. Other validation methods resample without replacement  
39  
40 and thereby such validation datasets are produced through a pre-specified number of surrogate  
41  
42 datasets, and each of the original cases will be left out exactly once, which results in a smaller dataset.  
43  
44 Since our dataset is not very large, we decided to use bootstrapping as internal validation method.  
45  
46 Bootstrapping was performed to estimate the performance in future patients, and to adjust the model by  
47  
48 the calculated shrinkage factor so that future predictions will be less extreme.[24]  
49  
50

#### 51 52 Performance of the model

53  
54 We quantified measures of performance, discrimination and calibration. Overall model performance is  
55  
56 the distance between predicted- and actual outcome.[28] To quantify overall model performance, we  
57  
58 assessed Brier, Brier<sub>scaled</sub> and Nagelkerke's R<sup>2</sup>. For Brier, squared differences between actual outcome  
59  
60 and predictions were calculated. Brier can range from 0 for a perfect model to 0.25 for a noninformative

1  
2  
3 model with 50% incidence of the outcome.  $Brier_{scaled}$  is scaled by its maximum under a noninformative  
4 model and range between 0-100%. Nagelkerke's  $R^2$  is a measure of explained variation.[31] The ability  
5 of the model to discriminate between those with and without the outcome was quantified as the area  
6 under the receiver operating characteristic curve (AUC). This can range from 50% (no discriminative  
7 capacity) to 100% (perfect discriminative capacity). The discriminative capacity was interpreted as  
8 reasonable when AUC was  $>0.70$  and good when AUC was  $>0.80$ .[32] Calibration of the model is the  
9 agreement between predicted probabilities (probability of an event calculated with the model) and  
10 observed frequencies of outcome (accuracy) and was assessed by visually inspecting the calibration  
11 plot.[28] Furthermore, we computed Hosmer and Lemeshow (H-L) goodness-of-fit as a quantitative  
12 measure of calibration. A high H-L statistic is related to a low P-value, and indicates a poor fit.[24]  
13  
14 All statistical analyses were performed using R 3.5.3. Packages `vim`, `mice`, `rms`, `pROC`, and  
15 `generalhoslem` were used.  
16  
17  
18  
19  
20  
21  
22  
23  
24  
25  
26  
27

### 28 *Patient and Public Involvement*

29  
30 Patients were involved in the design of the study which included consultation during grant writing and  
31 advice in setting up the study design. Furthermore, patients were involved in the process of incorporating  
32 the prediction models in a patient decision aid. Focus groups were held and patients and clinicians  
33 together were asked for their opinion regarding incorporation of the models in the preoperative process.  
34  
35  
36  
37  
38  
39  
40  
41  
42  
43  
44  
45  
46  
47  
48  
49  
50  
51  
52  
53  
54  
55  
56  
57  
58  
59  
60

## Results

### *Participants*

In total 3,776 patients with primary THA or TKA were identified as eligible for the present study. Of these patients, 2,494 patients underwent THA and 1,282 patients underwent TKA. See Figure 1 for participant flow. Baseline characteristics of the final cohort are presented in Table 1.

### *Model development*

The number of missing values per predictor are shown in Table 1. For the majority of potential predictors, there was only a small quantity of missing data; however, smoking status was missing in 24.7%. After imputation, all patients were available for multivariable modelling. There were no missing values in surgical complications.

### *Model specification*

According to our selection of predictor candidates per outcome (depicted in eTable 4), we entered all selected predictors in the model. For SSI, these predictors were: age, smoking status, BMI, presence of an immunological disorder, diabetes mellitus, liver disease, and use of Non-Steroidal Anti-Inflammatory Drugs (NSAID's). We found a significant influence of age, immunological disorder, diabetes mellitus and liver disease of which the presence of liver disease showed to be the strongest predictor with an odds ratio of 10.7 (95%CI=2.4–46.6). The bootstrap yielded a shrinkage factor of 0.984, which was used to adjust the regression coefficients. Table 2 shows the adjusted prediction models and odds ratios that estimates the risk for SSI and secondary outcomes. For original prediction models and adjusted coefficients, see eTable 5.

### *Model performance*

Brier, Brier<sub>scaled</sub> and Nagelkerke's  $R^2$ , to assess overall performance of the model for SSI, were 0.010, 0.026 and 0.081 respectively.

The discriminative performance of the model for SSI is shown in Figure 2. The AUC was 71.9 (95%CI=69.4–74.4%), which indicates reasonable discriminative ability. Predicted probabilities ranged between 0.01%–51.0%, with a mean of 1.0% (SD=1.5%). Calibration was poor, indicated by significant H-L statistic ( $p<0.001$ ). The corresponding calibration plot that represents the accuracy of the model is

1  
2  
3 shown in Figure 3. The calibration plot showed quite accurate prediction, especially when the risk is low.  
4  
5 The model underestimates the risk with a predicted probability >0.10.  
6  
7 The performance, discrimination and calibration of SSI and secondary outcomes are presented in Table  
8  
9 3. The predictive algorithms for POB and NER showed reasonable discriminative values (AUC=73.0  
10  
11 and 76.6) and explained fraction of variance by a Nagelkerke's  $R^2$  of 0.072 and 0.086 respectively. The  
12  
13 prediction model for delirium showed good discriminative value (AUC=85.9) and explained fraction of  
14  
15 variance of 0.193. The models for luxation and VTE showed least favorable results on discrimination  
16  
17 (AUC=58.4 and 66.3 respectively) and explained fraction of variance of 0.010 and 0.047 respectively.  
18  
19 The ROC curves and calibration plots for secondary outcomes are presented in eFigure 1.  
20  
21  
22  
23  
24  
25  
26  
27  
28  
29  
30  
31  
32  
33  
34  
35  
36  
37  
38  
39  
40  
41  
42  
43  
44  
45  
46  
47  
48  
49  
50  
51  
52  
53  
54  
55  
56  
57  
58  
59  
60



Table 1. Patient characteristics

| Patient characteristics           | Missing values | Total population<br>(n=3776) | Total hip replacement<br>(n=2494) | Total knee replacement<br>(n=1282) |
|-----------------------------------|----------------|------------------------------|-----------------------------------|------------------------------------|
| Age, mean (SD), years             | 0.1%           | 60.2 (15.8)                  | 57.7 (17.0)                       | 65.1 (11.7)                        |
| Gender: female No. (%)            | 0.1%           | 2298 (60.9%)                 | 1468 (58.9%)                      | 829 (64.7%)                        |
| BMI, mean (SD), kg/m <sup>2</sup> | 2.6%           | 27.5 (5.2)                   | 26.6 (4.7)                        | 29.3 (5.6)                         |
| Smoking: yes No. (%)              | 24.7%          | 498 (13.2)                   | 341 (13.7)                        | 157 (12.2)                         |
| ASA classification No. (%)        | 0.4%           |                              |                                   |                                    |
| I                                 |                | 839 (22.2)                   | 669 (26.8)                        | 170 (13.3)                         |
| II                                |                | 2091 (55.4)                  | 1314 (52.7)                       | 777 (60.6)                         |
| III                               |                | 829 (22.0)                   | 500 (20.0)                        | 329 (25.7)                         |
| Diagnosis hip No. (%)             | 0.4%           |                              |                                   |                                    |
| arthrosis                         |                |                              | 1599 (64.1)                       |                                    |
| rheumatoid arthritis              |                |                              | 68 (2.7)                          |                                    |
| dysplasia                         |                |                              | 241 (9.7)                         |                                    |
| osteonecrosis                     |                |                              | 228 (9.1)                         |                                    |
| other                             |                |                              | 349 (14.0)                        |                                    |
| Diagnosis knee No. (%)            | 0.9%           |                              |                                   |                                    |
| arthrosis                         |                |                              |                                   | 1037 (80.9)                        |
| rheumatoid arthritis              |                |                              |                                   | 123 (9.6)                          |
| other                             |                |                              |                                   | 111 (8.7)                          |
| Side affected: right No. (%)      | 0.3%           | 1915 (50.9)                  | 1257 (50.4)                       | 658 (51.3)                         |
| Surgical complications No. (%)    | 0%             |                              |                                   |                                    |
| surgical site infection           |                | 38 (1.0)                     | 25 (1.0)                          | 13 (1.0)                           |
| venous thromboembolism            |                | 26 (0.7)                     | 17 (0.7)                          | 9 (0.7)                            |
| postoperative bleeding            |                | 47 (1.2)                     | 28 (1.1)                          | 19 (1.5)                           |
| luxation                          |                | 32 (0.8)                     | 31 (1.2)                          | 1 (0.1)                            |

|              |  |          |          |         |
|--------------|--|----------|----------|---------|
| delirium     |  | 24 (0.6) | 20 (0.8) | 4 (0.3) |
| nerve damage |  | 24 (0.6) | 21 (0.8) | 3 (0.2) |

For peer review only

Table 2. Models including the coefficient per predictor per surgical outcome

| Variable                                   | Surgical site infection |                       | Venous thromboembolism |                      | Postoperative bleeding |                     | Luxation      |                     | Delirium      |                     | Nerve damage  |                     |
|--------------------------------------------|-------------------------|-----------------------|------------------------|----------------------|------------------------|---------------------|---------------|---------------------|---------------|---------------------|---------------|---------------------|
|                                            | Coefficient *           | Odds Ratio (95% CI)   | Coefficient *          | Odds Ratio (95% CI)  | Coefficient *          | Odds Ratio (95% CI) | Coefficient * | Odds Ratio (95% CI) | Coefficient * | Odds Ratio (95% CI) | Coefficient * | Odds Ratio (95% CI) |
| Intercept                                  | -7.272                  | -                     | -4.790                 | -                    | -7.172                 | -                   | -5.864        | -                   | -14.307       | -                   | -2.250        | -                   |
| Age (years)                                | 0.031                   | 1.032 (1.005-1.059)   | -0.008                 | 0.991 (0.966-1.018)  | 0.033                  | 1.034 (1.006-1.062) | 0.013         | 1.014 (0.991-1.038) | 0.127         | 1.137 (1.067-1.212) | -0.051        | 0.949 (0.926-0.974) |
| Gender (male/female)                       | -                       | -                     | -0.168                 | 0.844 (0.377-1.888)  | -                      | -                   | -             | -                   | -             | -                   | -0.254        | 0.772 (0.319-1.868) |
| BMI (kg/m <sup>2</sup> )                   | -0.002                  | 0.998 (0.937-1.063)   | -                      | -                    | 0.012                  | 1.012 (0.954-1.073) | 0.021         | 1.023 (0.951-1.099) | -             | -                   | -             | -                   |
| Obesity (yes/no)                           | -                       | -                     | 1.376                  | 4.040 (1.462-11.159) | -                      | -                   | -             | -                   | -             | -                   | -             | -                   |
| Smoking status (yes/no)                    | 0.757                   | 2.145 (0.883-5.213)   | -                      | -                    | -0.023                 | 0.952 (0.336-2.701) | 0.491         | 1.667 (0.651-4.268) | -             | -                   | 0.572         | 1.754 (0.510-6.029) |
| Lung disease (yes/no)                      | -                       | -                     | -                      | -                    | -                      | -                   | -             | -                   | -             | -                   | -             | -                   |
| Immunological disorder (yes/no)            | 0.891                   | 2.474 (1.186-5.158)   | -                      | -                    | -                      | -                   | -             | -                   | -             | -                   | -             | -                   |
| Rheumatoid arthritis (yes/no)              | -                       | -                     | -                      | -                    | -                      | -                   | 0.538         | 1.752 (0.408-7.530) | -             | -                   | -             | -                   |
| Diabetes mellitus (yes/no)                 | 0.904                   | 2.494 (1.125 - 5.529) | 0.829                  | 2.317 (0.870-6.173)  | -                      | -                   | -             | -                   | -             | -                   | -             | -                   |
| Liver disease (yes/no)                     | 2.345                   | 10.659 (2.441-46.555) | -                      | -                    | -                      | -                   | -             | -                   | -             | -                   | -             | -                   |
| Heart disease (yes/no)                     | -                       | -                     | -                      | -                    | 0.729                  | 2.086 (1.040-4.183) | -             | -                   | 0.348         | 1.422 (0.590-3.428) | -             | -                   |
| Disease of central nervous system (yes/no) | -                       | -                     | -                      | -                    | -                      | -                   | 0.106         | 1.113 (0.324-3.822) | 0.898         | 2.465 (0.936-6.490) | -             | -                   |
| Thromboembolic event (yes/no)              | -                       | -                     | 1.501                  | 4.586 (1.521-13.826) | -                      | -                   | -             | -                   | -             | -                   | -             | -                   |
| Dysplasia (yes/no)                         | -                       | -                     | -                      | -                    | -                      | -                   | -             | -                   | -             | -                   | -0.009        | 0.993               |

1  
2  
3  
4  
5  
6  
7  
8  
9  
10  
11  
12  
13  
14  
15  
16  
17  
18  
19  
20  
21  
22  
23  
24  
25  
26  
27  
28  
29  
30  
31  
32  
33  
34  
35  
36  
37  
38  
39  
40  
41  
42  
43  
44  
45  
46

|                                                                                                                                                                                                                                                                                                                                                                                                       |       |                     |   |   |       |                     |   |   |   |   |   |               |
|-------------------------------------------------------------------------------------------------------------------------------------------------------------------------------------------------------------------------------------------------------------------------------------------------------------------------------------------------------------------------------------------------------|-------|---------------------|---|---|-------|---------------------|---|---|---|---|---|---------------|
|                                                                                                                                                                                                                                                                                                                                                                                                       |       |                     |   |   |       |                     |   |   |   |   |   | (0.217-4.552) |
| Vitamin K antagonist use (yes/no)                                                                                                                                                                                                                                                                                                                                                                     | -     | -                   | - | - | 0.787 | 2.220 (1.022-4.821) | - | - | - | - | - | -             |
| NSAID's (yes/no)                                                                                                                                                                                                                                                                                                                                                                                      | 0.619 | 1.877 (0.946-3.725) | - | - | -     | -                   | - | - | - | - | - | -             |
| <p>To calculate the absolute risk for the surgical complications: <math>P_{\text{(surgical complication)}} = 1 / (1 + \exp(-\text{linear part})) \times 100\%</math>. Linear part = intercept + (coefficients * variables).<br/> *adjustment for over-fitting by shrinkage factor (SF); the intercept was re-estimated.<br/> BMI: Body Mass Index, NSAID's: Non-Steroidal Anti-Inflammatory Drugs</p> |       |                     |   |   |       |                     |   |   |   |   |   |               |

For peer review only

Table 3. Model performance

|                             | Surgical site infection | Venous Thrombo-embolism | Post-operative bleeding | Luxation            | Delirium            | Nerve damage        |
|-----------------------------|-------------------------|-------------------------|-------------------------|---------------------|---------------------|---------------------|
| Brier score                 | 0.010                   | 0.007                   | 0.012                   | 0.012               | 0.006               | 0.008               |
| Brier <sub>scaled</sub>     | 0.026                   | 0.007                   | 0.010                   | 0.003               | 0.027               | 0.012               |
| Nagelkerke's R <sup>2</sup> | 0.081                   | 0.047                   | 0.072                   | 0.010               | 0.193               | 0.086               |
| AUC<br>(95%CI)              | 71.9<br>(69.4-74.4)     | 66.3<br>(62.7-69.9)     | 73.0<br>(70.7-75.4)     | 58.4<br>(55.0-61.8) | 85.9<br>(83.8-87.9) | 76.6<br>(73.2-80.0) |
| H-L statistic<br>(p-value)  | p < 0.001               | p < 0.001               | p < 0.001               | p < 0.001           | p < 0.001           | p < 0.001           |
| Predicted possibilities     |                         |                         |                         |                     |                     |                     |
| Mean                        | 0.010                   | 0.007                   | 0.012                   | 0.012               | <0.001              | 0.008               |
| SD                          | 0.015                   | 0.007                   | 0.012                   | 0.004               | 0.012               | 0.010               |
| Range                       | 0.001-0.510             | 0.003-0.147             | 0.001-0.090             | 0.005-0.045         | <0.001-0.147        | 0.001-0.072         |
| Shrinkage factor            | 0.984                   | 0.986                   | 0.989                   | 0.941               | 0.993               | 0.987               |

## Discussion

The prediction models developed in this study are aimed for personalized counselling and SDM in orthopedic outpatient clinics. With our models, risk for surgical site infection (SSI), venous thromboembolism (VTE), postoperative bleeding (POB), luxation, delirium, and nerve damage (NER) can be predicted by patient characteristics, comorbidities and medication use. For SSI, predicted probabilities range between 0.01%-51.0%, which makes the model useful in adding relevant personalized information for adequate SDM compared to the previously used population-based probability of risk of 3%.<sup>[26]</sup> However, it is important to state that the model showed moderately accurate prediction, especially when the risk is low. The model underestimates the risk with a predicted probability >10%. Therefore, predicted probabilities exceeding 10% should be interpreted with caution. Furthermore, other performance measures were moderate to reasonable, indicating moderate overall performance of the model for SSI. We found similar results for other outcomes, except for the model for luxation; this model seriously underestimates the risk for luxation and could therefore not be used for personalized counselling.

Our results are comparable with the results of a recent meta-analysis on impact of comorbidities on SSI in THA or TKA. The authors stated diabetes and liver disease to contribute to a higher risk for SSI.<sup>[3]</sup> Another study with similar discriminative capacity found BMI, use of immunosuppression, ASA-score, procedure duration, and prior surgeries as risk factors for SSI.<sup>[33]</sup> Some of these predictors did not contribute to a higher performance in our model and were therefore not included. We additionally found age to be a significant predictor for SSI. For the already available prediction model based on data of Veterans with osteoarthritis of Harris et al., independent variables of the model cannot be compared for SSI since these results have not been reported.<sup>[15]</sup> We found a slightly better c-statistic (AUC) of 0.72 compared to 0.66 in their boosted model. Similar variables as those used in our models were used for the development of other models predicting postoperative complications as well, such as the models of Harris et al. Unfortunately, a direct comparison of the predictive capacity of these variables between the models of Harris et al. and our models is not possible, as the postoperative outcomes used in their prediction models were different to the postoperative outcomes used in our models.<sup>[17]</sup> Also comparison with Bozic et al., is difficult since applicability to non-Medicare population is questionable, as they also describe in their discussion.<sup>[16]</sup>

1  
2  
3 Based on literature we expected use of thromboprophylaxis, such as platelet aggregation inhibitors,  
4 direct oral anticoagulants, low-molecular-weight heparin, and/or vitamin K antagonists to be important  
5 predictors for POB. However, we could not demonstrate this finding in our model.[34] This is perhaps  
6 due to low frequencies of these predictors in our participants with POB and due to improved preoperative  
7 care regarding anticoagulant therapy. Our model for delirium included comparable predictors as other  
8 studies; they showed that age and preexisting cognitive impairment are important predictors for  
9 delirium.[35, 36] Our model confirms this finding. Kalisvaart et al., 2006 developed a comparable model  
10 based on acute- and elective hip surgery patients and found comparable predictors. The authors  
11 additionally found acute admission as predictor for delirium.[35] We cannot confirm this in our model  
12 since we focused on primary THA and TKA and these interventions are not primarily preferred in acute  
13 admissions due to hip fracture. The AUC indicates that our model is more accurate in estimating the risk  
14 for delirium (85.9 vs. 73).[35]

15  
16 For VTE we only found obesity and thromboembolic event as significant risk factors.[3, 37] This can be  
17 explained by the fact that the recurrence rate is high after earlier thromboembolic events.[38] We could  
18 not demonstrate diabetes to be a significant predictor for VTE.[3] For the risk of luxation, it is known that  
19 causes of dislocation are multifactorial and also caused by non-patient modifiable factors such as  
20 implant-related, surgery-related, and hospital-related factors. It is unclear to what extent these factors  
21 contribute to the occurrence of luxation, but we expect these factors to be of influence the model.[39,  
22 40] For these reasons, and the poor performance of the model for luxation, we consider this model of  
23 insufficient quality for use in patient information documents. Since we aimed our models to support  
24 preoperative SDM, we only used patient related variables as these variables are considered  
25 modifiable.[39, 41]

### 26 27 28 29 30 31 32 33 34 35 36 37 38 39 40 41 42 43 44 45 46 47 *Strengths and limitations*

48 A strong point is that we thoroughly created a big dataset and we used state-of-the-art statistics for our  
49 analyses. Furthermore, the simplicity of our models is a strength because we used predictors collected  
50 in usual care. The predictors are easily to assess and thereby easily to implement in care. Several  
51 limitations in this study should be noted. We retrospectively analyzed prospectively collected data.  
52 These data were not primarily registered for research purposes and therefore their detail and accuracy  
53 could be less than optimal. Moreover, changes in reporting systems took place during the studied period,  
54  
55  
56  
57  
58  
59  
60

1  
2  
3 for instance the introduction of electronic medical records. It is known that changes in coding practice  
4 may change completeness of data.[42, 43] Although researchers performed data collection thoroughly,  
5 data about comorbidities and medication use could be missed because it was reported elsewhere.  
6  
7 Moreover, we expect a small quantity of underreporting regarding comorbidities since physicians and  
8  
9 anesthesiologists perchance make a selection of important comorbidities in their report. We tried to  
10  
11 correct for this limitation by including medication use since all drugs are registered in preoperative  
12  
13 anesthesia report. Also, data from 2004 until 2018 were used. In this period preoperative care has been  
14  
15 changed. To evaluate the effect of this change on our outcome, we checked our patterns of  
16  
17 complications and found no differences in this period. Furthermore, due to a low estimated event rate  
18  
19 (1-3%) we needed a large population to have enough events to include predictors into our models.  
20  
21 However, since not all predictors were significant in our final models, we expect that inclusion of more  
22  
23 predictors would not lead to a considerably different model, as also discussed above. The models were  
24  
25 developed based on pooled THA and TKA data. It is expected that the influence of patient  
26  
27 characteristics, comorbidities and medication use is comparable for both THA and TKA.[44] The  
28  
29 influence of comorbidities on outcomes is studied together quite often.[3] Furthermore, we tested this  
30  
31 assumption by performing the analysis on THA and TKA data only. The models with corresponding  
32  
33 performance measures were still consistent with the main analysis. Another limitation is that we only  
34  
35 performed internal validation by bootstrapping, and were not yet able to determine external validity and  
36  
37 clinical impact of the models. For clinical impact it is also important to determine the Minimal Clinically  
38  
39 Important Difference of the outcomes.  
40  
41  
42

### 43 *Conclusion*

44  
45 Clinical prediction models were developed to contribute to more unbiased and accurate counselling in  
46  
47 considering THA or TKA and are expected to be useful for identifying patients at risk for surgical  
48  
49 complications. For SSI, the discriminative ability was reasonable and predicted risk varied between  
50  
51 0.01%-51.0%. We expect the individual predicted risk to enhance SDM and support a well-founded  
52  
53 choice. We consider our models for SSI, delirium, and NER appropriate for clinical use when taking  
54  
55 under- and overestimation of predicted risk into account. For clinical use of the models VTE and POB,  
56  
57 caution concerning overestimation exceeding predicted probability of 0.08 and 0.05 (data presented in  
58  
59  
60



1  
2  
3 calibration plots in eFigure 1), respectively, should be taken into account. Future studies should evaluate  
4 clinical impact and whether our models are feasible in an external population.  
5  
6  
7

#### 8 *Supplementary information*

9  
10 In the supplementary file, an excel file with the prediction models calculator is provided, see Appendix  
11 1. The decision aid including the prediction models is published in Dutch at the website of the Radboud  
12 university medical center.  
13  
14  
15  
16

#### 17 *Ethics Statement*

18 Approval for this study was obtained at the Medical Ethical Committee of Radboudumc (2018-4880).  
19  
20  
21  
22

#### 23 *Funding statement*

24 This work was supported by the Dutch National Health Care Institute [Transparency about the quality of  
25 care 2018: using outcome information for SDM]. Grant number: N/A. The funding source was not  
26 involved during the study.  
27  
28  
29  
30  
31

#### 32 *Competing interests*

33 P. Van der Wees participates in the Scientific Advisory Panel of the American Physical Therapy  
34 Association (APTA)  
35  
36  
37  
38  
39  
40

#### 41 *Acknowledgements*

42 We thank Anouk Tulp for her contribution to the data collection. Furthermore we would like to  
43 acknowledge Stefan Riemens for offering help in reviewing the manuscript for grammar and wording.  
44  
45  
46  
47  
48

#### 49 *Author's contribution*

50 All authors confirm authorship on all four ICMJE criteria.  
51

52 *Conceptualization* – Lieke Sweerts, Thomas Hoogeboom, Philip van der Wees, Sebastiaan van de  
53 Groes  
54

55 *Data curation* – Lieke Sweerts  
56

57 *Formal analysis* – Lieke Sweerts, Thomas Hoogeboom, Thierry van Wessel, Sebastiaan van de Groes  
58  
59  
60

1  
2  
3 *Funding acquisition* – Sebastiaan van de Groes

4  
5 *Investigation* – Lieke Sweerts, Thierry van Wessel

6  
7 *Methodology* – Lieke Sweerts, Thomas Hoogeboom, Philip van der Wees, Sebastiaan van de Groes

8  
9 *Project administration* – Lieke Sweerts

10  
11 *Resources* – Lieke Sweerts, Thierry van Wessel

12  
13 *Software* –

14  
15 *Supervision* – Thomas Hoogeboom, Philip van der Wees, Sebastiaan van de Groes

16  
17 *Validation* – Lieke Sweerts

18  
19 *Visualization* – Lieke Sweerts, Thierry van Wessel

20  
21 *Writing – original draft* – Lieke Sweerts

22  
23 *Writing – review & editing* – Thomas Hoogeboom, Thierry van Wessel, Philip van der Wees,  
24 Sebastiaan van de Groes

25  
26  
27  
28 *Data availability statement*

29  
30 Raw data will not be shared via a public data repository. Data will be available upon request via the  
31 Data repository from Radboudumc.  
32  
33  
34  
35  
36  
37  
38  
39  
40  
41  
42  
43  
44  
45  
46  
47  
48  
49  
50  
51  
52  
53  
54  
55  
56  
57  
58  
59  
60

## References

- [1] A. J. Smink *et al.*, "'Beating osteoARthritis": Development of a stepped care strategy to optimize utilization and timing of non-surgical treatment modalities for patients with hip or knee osteoarthritis," *Clinical Rheumatology*, journal article vol. 30, no. 12, pp. 1623-1629, December 01 2011, doi: 10.1007/s10067-011-1835-x.
- [2] R. E. M. Mota, R. Tarricone, O. Ciani, J. F. P. Bridges, and M. Drummond, "Determinants of demand for total hip and knee arthroplasty: a systematic literature review," *BMC health services research*, vol. 12, pp. 225-225, 2012, doi: 10.1186/1472-6963-12-225.
- [3] B. Podmore, A. Hutchings, J. van der Meulen, A. Aggarwal, and S. Konan, "Impact of comorbid conditions on outcomes of hip and knee replacement surgery: a systematic review and meta-analysis," (in eng), *BMJ Open*, vol. 8, no. 7, p. e021784, Jul 11 2018, doi: 10.1136/bmjopen-2018-021784.
- [4] G. A. Hawker *et al.*, "Which patients are most likely to benefit from total joint arthroplasty?," (in eng), *Arthritis Rheum*, vol. 65, no. 5, pp. 1243-52, May 2013, doi: 10.1002/art.37901.
- [5] I. A. Ten Have, M. P. van den Bekerom, D. F. van Deurzen, and M. G. Hageman, "Role of decision aids in orthopaedic surgery," *World journal of orthopedics*, vol. 6, no. 11, pp. 864-866, 2015, doi: 10.5312/wjo.v6.i11.864.
- [6] N. V. Chawla and D. A. Davis, "Bringing big data to personalized healthcare: a patient-centered framework," (in eng), *J Gen Intern Med*, vol. 28 Suppl 3, no. Suppl 3, pp. S660-S665, 2013, doi: 10.1007/s11606-013-2455-8.
- [7] G. Elwyn, "Idealistic, impractical, impossible? Shared decision making in the real world," (in eng), *Br J Gen Pract*, vol. 56, no. 527, pp. 403-404, 2006. [Online]. Available: <https://pubmed.ncbi.nlm.nih.gov/16762119>  
<https://www.ncbi.nlm.nih.gov/pmc/articles/PMC1839012/>.
- [8] G. Elwyn *et al.*, "Achieving involvement: process outcomes from a cluster randomized trial of shared decision making skill development and use of risk communication aids in general practice," *Family Practice*, vol. 21, no. 4, pp. 337-346, 2004, doi: 10.1093/fampra/cmh401.
- [9] R. A. Meguid, M. R. Bronsert, E. Juarez-Colunga, K. E. Hammermeister, and W. G. Henderson, "Surgical Risk Preoperative Assessment System (SURPAS): III. Accurate Preoperative Prediction of 8 Adverse Outcomes Using 8 Predictor Variables," *Annals of Surgery*, vol. 264,

- no. 1, 2016. [Online]. Available:  
[https://journals.lww.com/annalsofsurgery/Fulltext/2016/07000/Surgical\\_Risk\\_Preoperative\\_Assessment\\_System.4.aspx](https://journals.lww.com/annalsofsurgery/Fulltext/2016/07000/Surgical_Risk_Preoperative_Assessment_System.4.aspx).
- [10] A. W. Trickey, Q. Ding, and A. H. S. Harris, "How Accurate Are the Surgical Risk Preoperative Assessment System (SURPAS) Universal Calculators in Total Joint Arthroplasty?," (in eng), *Clinical orthopaedics and related research*, vol. 478, no. 2, pp. 241-251, Feb 2020, doi: 10.1097/corr.0000000000001078.
- [11] D. L. Riddle, G. J. Golladay, W. A. Jiranek, and R. A. Perera, "External Validation of a Prognostic Model for Predicting Nonresponse Following Knee Arthroplasty," (in eng), *J Arthroplasty*, vol. 32, no. 4, pp. 1153-1158.e1, Apr 2017, doi: 10.1016/j.arth.2016.11.007.
- [12] T. Barlow, M. Dunbar, A. Sprowson, N. Parsons, and D. Griffin, "Development of an outcome prediction tool for patients considering a total knee replacement--the Knee Outcome Prediction Study (KOPS)," (in eng), *BMC musculoskeletal disorders*, vol. 15, p. 451, Dec 23 2014, doi: 10.1186/1471-2474-15-451.
- [13] E. Lungu, F. Desmeules, C. E. Dionne, E. L. Belzile, and P. A. Vendittoli, "Prediction of poor outcomes six months following total knee arthroplasty in patients awaiting surgery," (in eng), *BMC musculoskeletal disorders*, vol. 15, p. 299, Sep 8 2014, doi: 10.1186/1471-2474-15-299.
- [14] J. J. Tolk, J. E. H. Waarsing, R. P. A. Janssen, L. N. van Steenberghe, S. M. A. Bierma-Zeinstra, and M. Reijman, "Development of Preoperative Prediction Models for Pain and Functional Outcome After Total Knee Arthroplasty Using The Dutch Arthroplasty Register Data," (in eng), *J Arthroplasty*, Oct 18 2019, doi: 10.1016/j.arth.2019.10.010.
- [15] A. H. Harris, A. C. Kuo, T. Bowe, S. Gupta, D. Nordin, and N. J. Giori, "Prediction Models for 30-Day Mortality and Complications After Total Knee and Hip Arthroplasties for Veteran Health Administration Patients With Osteoarthritis," (in eng), *The Journal of arthroplasty*, vol. 33, no. 5, pp. 1539-1545, 2018, doi: 10.1016/j.arth.2017.12.003.
- [16] K. J. Bozic *et al.*, "Estimating risk in Medicare patients with THA: an electronic risk calculator for periprosthetic joint infection and mortality," (in eng), *Clinical orthopaedics and related research*, vol. 471, no. 2, pp. 574-583, 2013, doi: 10.1007/s11999-012-2605-z.
- [17] A. H. S. Harris, A. C. Kuo, Y. Weng, A. W. Trickey, T. Bowe, and N. J. Giori, "Can Machine Learning Methods Produce Accurate and Easy-to-use Prediction Models of 30-day

- 1  
2  
3 Complications and Mortality After Knee or Hip Arthroplasty?," (in eng), *Clinical orthopaedics and*  
4 *related research*, vol. 477, no. 2, pp. 452-460, 2019, doi: 10.1097/CORR.0000000000000601.
- 5  
6  
7 [18] K. G. Moons *et al.*, "Transparent Reporting of a multivariable prediction model for Individual  
8 Prognosis or Diagnosis (TRIPOD): explanation and elaboration," (in eng), *Ann Intern Med*, vol.  
9 162, no. 1, pp. W1-73, Jan 6 2015, doi: 10.7326/m14-0698.
- 10  
11  
12 [19] E. D. C. Castor. "Castor Electronic Data Capture." <https://castoredc.com> (accessed August 28,  
13 2019).
- 14  
15  
16 [20] L. N. van Steenberghe *et al.*, "More than 95% completeness of reported procedures in the  
17 population-based Dutch Arthroplasty Register," *Acta orthopaedica*, vol. 86, no. 4, pp. 498-505,  
18 2015, doi: 10.3109/17453674.2015.1028307.
- 19  
20  
21 [21] M. C. de Waal Malefijt, "An orthopedic complication-registration system," (in eng), *Acta*  
22 *orthopaedica Scandinavica*, vol. 66, no. 1, pp. 84-9, Feb 1995.
- 23  
24  
25 [22] P. J. van der Wees *et al.*, "Patient-reported health outcomes after total hip and knee surgery in  
26 a Dutch University Hospital Setting: results of twenty years clinical registry," (in eng), *BMC*  
27 *musculoskeletal disorders*, vol. 18, no. 1, p. 97, Mar 3 2017, doi: 10.1186/s12891-017-1455-y.
- 28  
29  
30 [23] ZorginstituutNederland. "Farmacotherapeutisch Kompas." <https://farmacotherapeutischkompas.nl> (accessed 2020).
- 31  
32  
33 [24] P. Peduzzi, J. Concato, E. Kemper, T. R. Holford, and A. R. Feinstein, "A simulation study of  
34 the number of events per variable in logistic regression analysis," (in eng), *Journal of clinical*  
35 *epidemiology*, vol. 49, no. 12, pp. 1373-9, Dec 1996.
- 36  
37  
38 [25] E. Vittinghoff and C. E. McCulloch, "Relaxing the rule of ten events per variable in logistic and  
39 Cox regression," (in eng), *Am J Epidemiol*, vol. 165, no. 6, pp. 710-8, Mar 15 2007, doi:  
40 10.1093/aje/kwk052.
- 41  
42  
43 [26] E. van Arkel, J. van der Kraan, M. Hageman, and K. Venhorst, "Consultkaart Artrose in de  
44 heup," 2016.
- 45  
46  
47 [27] A. R. Donders, G. J. van der Heijden, T. Stijnen, and K. G. Moons, "Review: a gentle introduction  
48 to imputation of missing values," (in eng), *Journal of clinical epidemiology*, vol. 59, no. 10, pp.  
49 1087-91, Oct 2006, doi: 10.1016/j.jclinepi.2006.01.014.
- 50  
51  
52 [28] E. W. Steyerberg, *Clinical Prediction Models*. New York: Springer, 2009.
- 53  
54  
55  
56  
57  
58  
59  
60

- 1  
2  
3 [29] N. J. Salkind, "Encyclopedia of Measurement and Statistics," 0, 2020/05/07 2007, doi:  
4 10.4135/9781412952644.  
5  
6 [30] D. B. RUBIN, "Inference and missing data," *Biometrika*, vol. 63, no. 3, pp. 581-592, 1976, doi:  
7 10.1093/biomet/63.3.581.  
8  
9 [31] E. W. Steyerberg *et al.*, "Assessing the performance of prediction models: a framework for  
10 traditional and novel measures," (in eng), *Epidemiology*, vol. 21, no. 1, pp. 128-38, Jan 2010,  
11 doi: 10.1097/EDE.0b013e3181c30fb2.  
12  
13 [32] D. W. Hosmer, S. Lemeshow, and R. Sturdivant, *Applied Logistic Regression (3rd Edition)*  
14 (Wiley Series in Probability and Statistics). New York: Wiley, 2013.  
15  
16 [33] E. F. Barbari *et al.*, "The Mayo prosthetic joint infection risk score: implication for surgical site  
17 infection reporting and risk stratification," (in eng), *Infect Control Hosp Epidemiol*, vol. 33, no. 8,  
18 pp. 774-81, Aug 2012, doi: 10.1086/666641.  
19  
20 [34] D. E. Lindquist *et al.*, "Comparison of Postoperative Bleeding in Total Hip and Knee Arthroplasty  
21 Patients Receiving Rivaroxaban, Enoxaparin, or Aspirin for Thromboprophylaxis," *Clinical and*  
22 *Applied Thrombosis/Hemostasis*, vol. 24, no. 8, pp. 1315-1321, 2018/11/01 2018, doi:  
23 10.1177/1076029618772337.  
24  
25 [35] K. J. Kalisvaart, R. Vreeswijk, J. F. M. De Jonghe, T. Van Der Ploeg, W. A. Van Gool, and P.  
26 Eikelenboom, "Risk Factors and Prediction of Postoperative Delirium in Elderly Hip-Surgery  
27 Patients: Implementation and Validation of a Medical Risk Factor Model," *Journal of the*  
28 *American Geriatrics Society*, vol. 54, no. 5, pp. 817-822, 2006/05/01 2006, doi: 10.1111/j.1532-  
29 5415.2006.00704.x.  
30  
31 [36] H. Lindroth *et al.*, "Systematic review of prediction models for delirium in the older adult  
32 inpatient," *BMJ Open*, vol. 8, no. 4, p. e019223, 2018, doi: 10.1136/bmjopen-2017-019223.  
33  
34 [37] K. Migita *et al.*, "Venous thromboembolism after total joint arthroplasty: results from a Japanese  
35 multicenter cohort study," (in eng), *Arthritis Res Ther*, vol. 16, no. 4, pp. R154-R154, 2014, doi:  
36 10.1186/ar4616.  
37  
38 [38] P.-O. Hansson, J. Sörbo, and H. Eriksson, "Recurrent Venous Thromboembolism After Deep  
39 Vein Thrombosis: Incidence and Risk Factors," *Archives of Internal Medicine*, vol. 160, no. 6,  
40 pp. 769-774, 2000, doi: 10.1001/archinte.160.6.769.  
41  
42  
43  
44  
45  
46  
47  
48  
49  
50  
51  
52  
53  
54  
55  
56  
57  
58  
59  
60

- 1  
2  
3 [39] J. Dargel, J. Oppermann, G.-P. Brüggemann, and P. Eysel, "Dislocation following total hip  
4 replacement," (in eng), *Dtsch Arztebl Int*, vol. 111, no. 51-52, pp. 884-890, 2014, doi:  
5 10.3238/arztebl.2014.0884.  
6  
7  
8  
9 [40] S. K. Kunutsor *et al.*, "Risk factors for dislocation after primary total hip replacement: a  
10 systematic review and meta-analysis of 125 studies involving approximately five million hip  
11 replacements," *The Lancet Rheumatology*, vol. 1, no. 2, pp. e111-e121, 2019, doi:  
12 10.1016/S2665-9913(19)30045-1.  
13  
14  
15  
16 [41] M. H. Fessy *et al.*, "What are the risk factors for dislocation in primary total hip arthroplasty? A  
17 multicenter case-control study of 128 unstable and 438 stable hips," (in eng), *Orthop Traumatol*  
18 *Surg Res*, vol. 103, no. 5, pp. 663-668, Sep 2017, doi: 10.1016/j.otsr.2017.05.014.  
19  
20  
21  
22 [42] S. Schneeweiss and J. Avorn, "A review of uses of health care utilization databases for  
23 epidemiologic research on therapeutics," *Journal of clinical epidemiology*, vol. 58, no. 4, pp.  
24 323-337, 2005/04/01/ 2005, doi: <https://doi.org/10.1016/j.jclinepi.2004.10.012>.  
25  
26  
27  
28 [43] L. G. Hemkens, D. G. Contopoulos-Ioannidis, and J. P. A. Ioannidis, "Routinely collected data  
29 and comparative effectiveness evidence: promises and limitations," (in eng), *CMAJ*, vol. 188,  
30 no. 8, pp. E158-E164, 2016, doi: 10.1503/cmaj.150653.  
31  
32  
33  
34 [44] P. F. Dobson and M. R. Reed, "Prevention of infection in primary THA and TKA," (in eng),  
35 *EFORT Open Rev*, vol. 5, no. 10, pp. 604-613, 2020, doi: 10.1302/2058-5241.5.200004.  
36  
37  
38  
39  
40  
41  
42  
43  
44  
45  
46  
47  
48  
49  
50  
51  
52  
53  
54  
55  
56  
57  
58  
59  
60

**Abbreviations used in manuscript**

1  
2  
3  
4  
5  
6  
7  
8  
9  
10  
11  
12  
13  
14  
15  
16  
17  
18  
19  
20  
21  
22  
23  
24  
25  
26  
27  
28  
29  
30  
31  
32  
33  
34  
35  
36  
37  
38  
39  
40  
41  
42  
43  
44  
45  
46  
47  
48  
49  
50  
51  
52  
53  
54  
55  
56  
57  
58  
59  
60

ASA: American Society of Anesthesiologists

AUC: Area under the receiver operating characteristic curve

H-L: Hosmer and Lemeshow

LROI: Dutch Arthroplasty Register

NER: Nerve damage

NHS: National Health Service

NOV: Dutch Orthopaedic Association

NSAID's: Non-Steroidal Anti-Inflammatory Drugs

POB: Postoperative bleeding

PROMs: Patient Reported Outcome Measures

SDM: Shared decision making

SSI: Surgical site infection

THA: Total hip arthroplasty

TKA: Total knee arthroplasty

VTE: Venous Thromboembolism



1  
2  
3 Figure 1. Flow chart for inclusion and exclusion of patients. Variables indicated with an asterisk\* were  
4 primarily extracted from the LROI database. When these data were missing, the data were extracted  
5 from the (electronic) medical record. Castor EDC is indicated by Castor  
6  
7  
8  
9  
10  
11  
12  
13  
14  
15  
16  
17  
18  
19  
20  
21  
22  
23  
24  
25  
26  
27  
28  
29  
30  
31  
32  
33  
34  
35  
36  
37  
38  
39  
40  
41  
42  
43  
44  
45  
46  
47  
48  
49  
50  
51  
52  
53  
54  
55  
56  
57  
58  
59  
60

For peer review only

Figure 2. Receiver Operating Characteristic curve of the prediction model for surgical site infection

AUC=71.9 (95% CI = 69.4–74.4%)

For peer review only

1  
2  
3 Figure 3. Calibration plot with the actual probability against the predicted probability for the model for  
4 surgical site infection. The triangles indicate quantiles ( $g=10$ ) of patients with a similar predicted  
5 probability of success. The grey diagonal line represents perfect agreement between predicted and  
6  
7  
8  
9 actual probability  
10  
11  
12  
13  
14  
15  
16  
17  
18  
19  
20  
21  
22  
23  
24  
25  
26  
27  
28  
29  
30  
31  
32  
33  
34  
35  
36  
37  
38  
39  
40  
41  
42  
43  
44  
45  
46  
47  
48  
49  
50  
51  
52  
53  
54  
55  
56  
57  
58  
59  
60

For peer review only

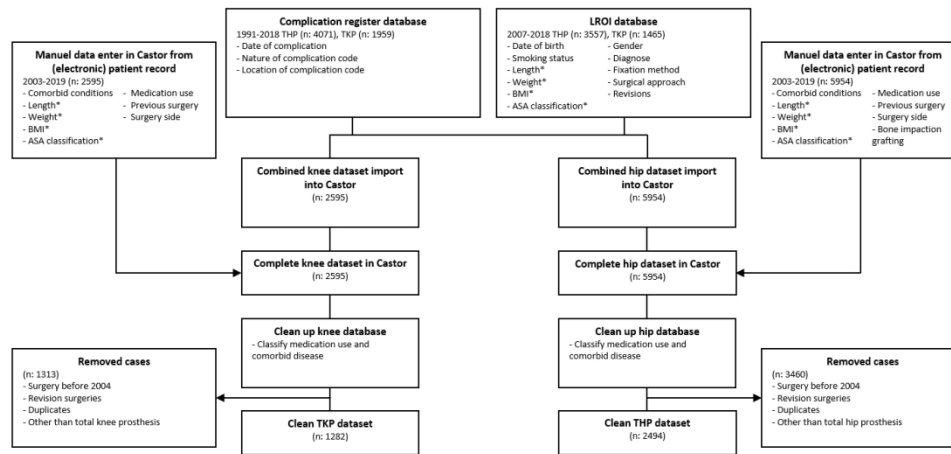

Figure 1. Flow chart for inclusion and exclusion of patients. Variables indicated with an asterisk\* were primarily extracted from the LROI database. When these data were missing, the data were extracted from the (electronic) medical record. Castor EDC is indicated by Castor

247x129mm (150 x 150 DPI)

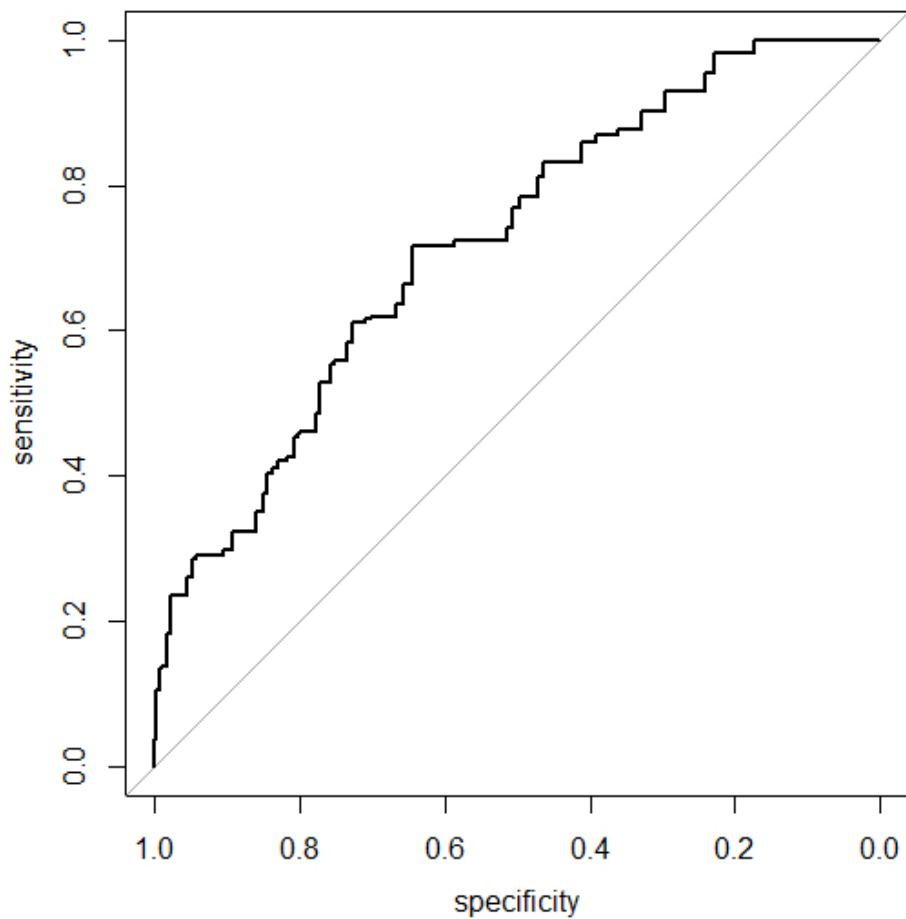

Figure 2. Receiver Operating Characteristic curve of the prediction model for surgical site infection  
AUC=71.9 (95%-CI = 69.4-74.4%)

145x145mm (96 x 96 DPI)

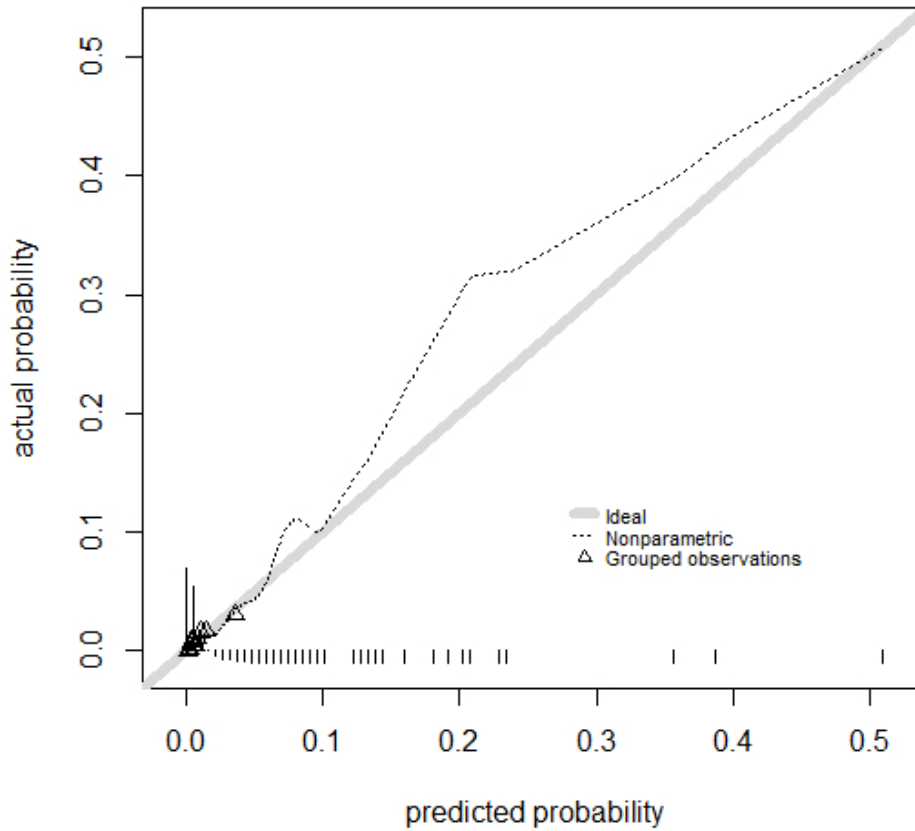

Figure 3. Calibration plot with the actual probability against the predicted probability for the model for surgical site infection. The triangles indicate quantiles ( $g=10$ ) of patients with a similar predicted probability of success. The grey diagonal line represents perfect agreement between predicted and actual probability

145x145mm (96 x 96 DPI)

**Supplemental Material**

|                                                                |    |
|----------------------------------------------------------------|----|
| eTable 1. Categorization of surgical complications             | 2  |
| eTable 2. Predictors per outcome                               | 4  |
| eTable 3. Categorization of comorbidities                      | 6  |
| eTable 4. Categorization of drug groups                        | 9  |
| eTable 5. Original prediction models and adjusted coefficients | 11 |
| eFigure 1. ROC curves and Calibration plots                    | 15 |
| References                                                     | 17 |

For peer review only

**eTable 1. Categorization of surgical complications**

| <b>Surgical site infection*</b> |                        |                               |                              |
|---------------------------------|------------------------|-------------------------------|------------------------------|
| Location code**                 | Location**             | Code nature of complication** | Nature of complication**     |
| 24                              | Pelvis                 | 012                           | Prosthesis infection         |
| 40                              | Hip                    | 083                           | Deep infection               |
| 42                              | Knee                   | 134                           | Infected organ               |
| <b>Venous thromboembolism</b>   |                        |                               |                              |
| 24                              | Pelvis                 | 104                           | Thrombosis                   |
| 40                              | Hip                    | 105                           | Embolus                      |
| 41                              | Femur/upper leg        |                               |                              |
| 42                              | Knee                   |                               |                              |
| 43                              | Lower leg              |                               |                              |
| 50                              | Lung                   |                               |                              |
| 56                              | Venous system          |                               |                              |
| <b>Luxation</b>                 |                        |                               |                              |
| 40                              | Hip                    | 041                           | Luxation                     |
|                                 |                        | 086                           | Disconnection prosthesis     |
| <b>Delirium</b>                 |                        |                               |                              |
| 54                              | Central nervous system | 141                           | Psychological decompensation |
| 58                              | Total                  |                               |                              |
| <b>Nerve damage</b>             |                        |                               |                              |
| 40                              | Hip                    | 094                           | Nerve lesion                 |
| 41                              | Femur/upper leg        |                               |                              |
| 43                              | Lower leg              |                               |                              |
| 57                              | Arterial system        |                               |                              |
| <b>Postoperative bleeding</b>   |                        |                               |                              |
| 40                              | Hip                    | 014                           | Wound leakage                |
| 41                              | Femur/upper leg        | 022                           | Bleeding                     |



|    |               |     |                   |
|----|---------------|-----|-------------------|
| 42 | Knee          | 100 | Secondary         |
| 56 | Venous system | 136 | bleeding/hematoma |
|    |               |     | Bleeding organ    |

\* the records registered with the nature of complication 010 (infection around sutures), 011 (superficial infection), 013 (local wound necrosis) and 014 (wound leakage) are checked for occurrence of surgical site infection and added to the outcome surgical site infection when this was the case.

\*\* only depicted when location code or code of the nature of complication occurred in the register.

Furthermore records registered with nature of complication 125 (interruption of sterility) were checked for occurrence of a surgical complication.

**eTable 2. Predictors per outcome**

|                                | OR*/RR** (95% CI)  | Study                      |
|--------------------------------|--------------------|----------------------------|
| <b>Surgical site infection</b> |                    |                            |
| Age                            |                    |                            |
| THA (>70years)                 | 0.7** (0.3-1.5)    | Almustafa et al (2018) (1) |
| TKA (>70years)                 | 1.7** (0.9-3.3)    | Almustafa et al (2018) (1) |
| Smoking status                 | 0.16** (0.05-0.52) | Møller et al (2002) (2)    |
| BMI                            | 6.7* (NR)          | Namba et al (2005) (3)     |
|                                | 4.8** (1.9-12.0)   | Almustafa et al (2018) (1) |
|                                | 2.53* (1.25-5.13)  | Chen et al (2013) (4)      |
| Immunological disorder         | -                  | <i>Clinical reasoning</i>  |
| NSAID's                        | -                  | <i>Clinical reasoning</i>  |
| Diabetes mellitus              | 1.90* (1.32-2.74)  | Podmore et al (2018) (5)   |
| Liver disease                  | 2.46* (1.46-4.12)  | Podmore et al (2018) (5)   |
| <b>Venous thromboembolism</b>  |                    |                            |
| Age                            |                    |                            |
| THA(≥75years)                  | 1.82* (1.15-2.87)  | Migita et al (2014) (6)    |
| TKA(≥75years)                  | 1.30* (0.99-1.71)  | Migita et al (2014) (6)    |
| Sex                            |                    |                            |
| THA(female>risk)               | 2.31* (1.03-5.18)  | Migita et al (2014) (6)    |
| TKA(female>risk)               | 1.58* (1.08-2.31)  | Migita et al (2014) (6)    |
| Diabetes mellitus              | 1.26* (0.92-1.72)  | Podmore et al (2018) (5)   |
| (TKA)                          | 1.36* (1.07-1.72)  | Yang et al (2015) (7)      |
| Thromboembolic event (TKA)     | 1.11* (0.36-3.46)  | Migita et al (2014) (6)    |
| Obesity                        |                    |                            |
| THA(BMI>30)                    | 0.89* (0.36-2.20)  | Migita et al (2014) (6)    |
| TKA(BMI>30)                    | 0.90* (0.58-1.38)  | Migita et al (2014) (6)    |
| <b>Postoperative bleeding</b>  |                    |                            |
| Age                            |                    |                            |
| THA(>70 years)                 | 2.61** (1.50-4.53) | Quintero et al (2016) (8)  |

|                                                                               |                    |                            |
|-------------------------------------------------------------------------------|--------------------|----------------------------|
| TKA(>70years)                                                                 | 2.25** (1.03-4.94) | Quintero et al (2016) (8)  |
| BMI                                                                           | -                  | <i>Clinical reasoning</i>  |
| Heart disease                                                                 | -                  | <i>Univariate analysis</i> |
| Vitamin K antagonists                                                         | -                  | <i>Clinical reasoning</i>  |
| Smoking status                                                                | -                  | <i>Univariate analysis</i> |
| Luxation                                                                      |                    |                            |
| Age                                                                           | 1.27* (1.02-1.57)  | Kunutsor et al (2019) (9)  |
| Smoking status                                                                | 1.08* (0.96-1.21)  | Kunutsor et al (2019) (9)  |
| BMI                                                                           | 1.38* (1.03-1.85)  | Kunutsor et al (2019) (9)  |
| Rheumatoid arthritis                                                          | 1.50* (1.05-2.15)  | Kunutsor et al (2019) (9)  |
| Disease of the central nervous system                                         | 2.54* (1.86-3.48)  | Kunutsor et al (2019) (9)  |
| Delirium                                                                      |                    |                            |
| Age                                                                           | 2.20* (1.80-2.71)  | Huang et al (2019) (10)    |
| Disease of the central nervous system ( <i>dementia</i> )                     | 7.44* (3.54-14.60) | Huang et al (2019) (10)    |
| Heart disease ( <i>congestive</i> )                                           | 0.83* (0.39-1.61)  | Huang et al (2019) (10)    |
| Nerve damage                                                                  |                    |                            |
| Age (<45 vs 65-74)                                                            | 7.17* (1.17-44.00) | Shetty et al (2016) (11)   |
| BMI (<BMI >risk)                                                              | 0.96* (0.77-1.21)  | Kawano et al (2018) (12)   |
| Sex ( <i>female &gt; risk</i> )                                               | Not reported       | Shetty et al (2016) (11)   |
| Smoking status                                                                | 1.90* (1.06-3.38)  | Shetty et al (2016) (11)   |
| Dysplasia                                                                     | 3.69* (1.65-8.28)  | Farrell et al (2005) (13)  |
| *results reported as odds ratio (OR); ** results reported as risk ratio (RR). |                    |                            |

**eTable 3. Categorization of comorbidities**

| <b>Categorization of comorbidities</b> |                                                                                                                                                                                                                                                                                    |
|----------------------------------------|------------------------------------------------------------------------------------------------------------------------------------------------------------------------------------------------------------------------------------------------------------------------------------|
| <b>Comorbid category*</b>              | <b>Included comorbid conditions**</b>                                                                                                                                                                                                                                              |
| Bleeding diseases                      | Hemophilia                                                                                                                                                                                                                                                                         |
| Blood quality                          | Anemia                                                                                                                                                                                                                                                                             |
| Cancer                                 | Prostate cancer<br>Leukemia<br>Breast cancer<br>Lymph node cancer<br>Bowen's disease                                                                                                                                                                                               |
| Central nervous system                 | Parkinson's disease<br>Dementia<br>TIA<br>CVA                                                                                                                                                                                                                                      |
| Cognitive impairment                   | Down syndrome                                                                                                                                                                                                                                                                      |
| Diabetes mellitus                      | Diabetes mellitus                                                                                                                                                                                                                                                                  |
| Heart disease                          | Ischemia of the heart<br>Valve damage blood regurgitation<br>Valve damage reduced blood flow<br>Valve replacement<br>Cardiomyopathy decreased contraction<br>Cardiomyopathy decreased relaxation<br>Heart decompensation<br>Heart attack<br>Angina pectoris<br>Atrial fibrillation |
| High blood pressure                    | Hypertension                                                                                                                                                                                                                                                                       |
| Hyper hormonal                         | Hyper hormonal                                                                                                                                                                                                                                                                     |
| Hypo hormonal                          | Hypo hormonal                                                                                                                                                                                                                                                                      |

|                            |                                                                                                                                                      |
|----------------------------|------------------------------------------------------------------------------------------------------------------------------------------------------|
| Immunological disorder     | Scleroderma<br>Rheumatoid arthritis<br>Gout<br>Psoriasis<br>Artritides<br>Dermal barrier disease<br>General immune disorder<br>Organ transplantation |
| Inflammation               | Chronic bladder infection                                                                                                                            |
| Kidney disease             | Kidney insufficiency                                                                                                                                 |
| Liver disease              | Liver cirrhosis                                                                                                                                      |
| Lung disease               | Chronic bronchitis<br>Asthma<br>COPD<br>Emphysema<br>Dyspnea                                                                                         |
| Mood sickness              | Depression<br>Psychosis                                                                                                                              |
| Obesity                    | Obesity                                                                                                                                              |
| Peripheral nervous system  | Nerve compression<br>Lumbar vertebral stenosis                                                                                                       |
| Poor peripheral blood flow | Atherosclerosis<br>Claudication intermittent                                                                                                         |
| Thromboembolic event       | Deep venous thromboembolism<br>Pulmonary embolism                                                                                                    |

\* the comorbid categories are used for analysis.

1  
2  
3 \*\* comorbid conditions are depicted when the frequency was  $\geq 10$  or when the  
4  
5 comorbid condition was considered as a relevant comorbid condition in terms of  
6  
7 outcome prediction.  
8  
9  
10  
11  
12  
13  
14  
15  
16  
17  
18  
19  
20  
21  
22  
23  
24  
25  
26  
27  
28  
29  
30  
31  
32  
33  
34  
35  
36  
37  
38  
39  
40  
41  
42  
43  
44  
45  
46  
47  
48  
49  
50  
51  
52  
53  
54  
55  
56  
57  
58  
59  
60

For peer review only

**eTable 4. Categorization of drug groups**

| <b>Categorization of medication use</b> |                                                                                    |
|-----------------------------------------|------------------------------------------------------------------------------------|
| <b>Drug category</b>                    | <b>Drugs groups according to the Dutch pharmacotherapeutic compass (14)</b>        |
| Acenocoumarol                           | Acenocoumarol*                                                                     |
| Antifibrinolytica                       | Antifibrinolytica                                                                  |
| Antimycotics                            | Antimycotic antibiotics<br>Others                                                  |
| Antiretroviral agents                   | Antiretroviral agents                                                              |
| Bisfosfonates                           | Bisfosfonates                                                                      |
| Colchicine group                        | Colchicine group                                                                   |
| Directly working oral anticoagulants    | Directly working oral anticoagulants                                               |
| DMARD's biologicals                     | Immunosuppressives selective<br>Immunosuppressives others                          |
| Factors in blood coagulance             | Factors in blood coagulance                                                        |
| Fenprocoumon                            | Fenprocoumon*                                                                      |
| Imidazoles                              | Cutane imidazoles<br>Others                                                        |
| Immunosuppressives                      | Interferons<br>Interleukin antagonists<br>Monoclonal antibodies                    |
| Local antibacterial agents              | Cutaneous<br>antibacterial agents<br>Ocular antibacterial agents                   |
| Local corticosteroids                   | Cutane corticosteroids<br>Nasal corticosteroids<br>Corticosteroides for inhalation |
| Low molecular weight heparins           | Low molecular weight heparins                                                      |
| Methotrexate                            | Methotrexate                                                                       |

|                                 |                                                                                                                                                                                                                                           |
|---------------------------------|-------------------------------------------------------------------------------------------------------------------------------------------------------------------------------------------------------------------------------------------|
| NSAID's**                       | Coxib's<br>Others                                                                                                                                                                                                                         |
| Oncology related detoxificants  | Oncology related detoxificants                                                                                                                                                                                                            |
| Salicylates                     | Analgetic salicylates<br>Trombocytic salicylates                                                                                                                                                                                          |
| Statins                         | Statins                                                                                                                                                                                                                                   |
| Systemic antibacterial agents   | Cephalosporins<br>Macrolides<br>Penicillin's<br>Tetracyclines<br>Carbapenems<br>Ceftriaxone<br>Glycopeptides<br>Aminoglycosides<br>Rifamycins tuberculose<br>Sulfonamides and trimethoprimides<br>Triazoles<br>Fluoroquinolones<br>Others |
| Thrombocyte-aggregationblockers | P2y12 blockers<br>Others                                                                                                                                                                                                                  |
| Xanthineoxidase inhibitor       | Xanthineoxidase inhibitor                                                                                                                                                                                                                 |

\* according the Dutch pharmacotherapeutic compass, acenocoumarol and fenprocoumon belong to the drug group 'vitamin k antagonists'. Based on expert opinion, acenocoumarol and fenprocoumon were included separately in the analysis because of the differences in half-life.

\*\* Non-Steroidal Anti-Inflammatory Drugs



**eTable 5. Original prediction models and adjusted coefficients**

## Prediction model for estimation of risk for surgical site infection

| Variable                                                                                                                                                                                                                                                                                                                                                                                                                                                                                                                                                                     | Regression coefficient | Regression coefficient<br>(adjusted with SF)* | Odds Ratio<br>(95% CI)   |
|------------------------------------------------------------------------------------------------------------------------------------------------------------------------------------------------------------------------------------------------------------------------------------------------------------------------------------------------------------------------------------------------------------------------------------------------------------------------------------------------------------------------------------------------------------------------------|------------------------|-----------------------------------------------|--------------------------|
| Intercept                                                                                                                                                                                                                                                                                                                                                                                                                                                                                                                                                                    | -7.305                 | -7.272                                        | -                        |
| Age (years)                                                                                                                                                                                                                                                                                                                                                                                                                                                                                                                                                                  | 0.031                  | 0.031                                         | 1.032<br>(1.005-1.059)   |
| BMI (kg/m <sup>2</sup> )                                                                                                                                                                                                                                                                                                                                                                                                                                                                                                                                                     | -0.002                 | -0.002                                        | 0.998<br>(0.937-1.063)   |
| Smoking status (yes/no)                                                                                                                                                                                                                                                                                                                                                                                                                                                                                                                                                      | 0.769                  | 0.757                                         | 2.145<br>(0.883-5.213)   |
| Immunological disorder<br>(yes/no)                                                                                                                                                                                                                                                                                                                                                                                                                                                                                                                                           | 0.905                  | 0.891                                         | 2.474<br>(1.186-5.158)   |
| Diabetes mellitus (yes/no)                                                                                                                                                                                                                                                                                                                                                                                                                                                                                                                                                   | 0.918                  | 0.904                                         | 2.494<br>(1.125-5.529)   |
| Liver disease (yes/no)                                                                                                                                                                                                                                                                                                                                                                                                                                                                                                                                                       | 2.382                  | 2.345                                         | 10.659<br>(2.441-46.555) |
| NSAID's (yes/no)                                                                                                                                                                                                                                                                                                                                                                                                                                                                                                                                                             | 0.629                  | 0.619                                         | 1.877<br>(0.946-3.725)   |
| <p>To calculate the absolute risk of surgical site infection: <math>P_{(\text{surgical site infection})} = 1 / (1 + e^{-\text{linear part}}) \times 100\%</math>;</p> <p>Linear part = <math>-7.272 + (0.031 \times \text{age} - 0.002 \times \text{BMI} + 0.757 \times \text{smoking status} + 0.891 \times \text{immunological disorder} + 0.904 \times \text{diabetes mellitus} + 2.345 \times \text{liver disease} + 0.619 \times \text{NSAID's})</math>.</p> <p>*adjustment for over-fitting by shrinkage factor (SF) (SF = 0.984); the intercept was re-estimated.</p> |                        |                                               |                          |

## Prediction model for estimation of risk for venous thromboembolism

| Variable    | Regression coefficient | Regression coefficient<br>(adjusted with SF)* | Odds Ratio<br>(95% CI) |
|-------------|------------------------|-----------------------------------------------|------------------------|
| Intercept   | -4.764                 | -4.790                                        | -                      |
| Age (years) | -0.009                 | -0.008                                        | 0.991                  |

|                                                                                                                                                                                                                                                                                                                                                    |        |        |                         |
|----------------------------------------------------------------------------------------------------------------------------------------------------------------------------------------------------------------------------------------------------------------------------------------------------------------------------------------------------|--------|--------|-------------------------|
|                                                                                                                                                                                                                                                                                                                                                    |        |        | (0.966-1.018)           |
| Gender (male/female)                                                                                                                                                                                                                                                                                                                               | -0.170 | -0.168 | 0.844<br>(0.377-1.888)  |
| Obesity (yes/no)                                                                                                                                                                                                                                                                                                                                   | 1.396  | 1.376  | 4.040<br>(1.462-11.159) |
| Diabetes mellitus (yes/no)                                                                                                                                                                                                                                                                                                                         | 0.841  | 0.829  | 2.317<br>(0.870-6.173)  |
| Thromboembolic event<br>(yes/no)                                                                                                                                                                                                                                                                                                                   | 1.523  | 1.501  | 4.586<br>(1.521-13.826) |
| To calculate the absolute risk of venous thromboembolism: $P_{(\text{venous thromboembolism})} = 1/(1+e^{-\text{linear part}}) \times 100\%$ ; Linear part = $-4.790 + (-0.008 \times \text{age} - 0.168 \times \text{gender} + 1.376 \times \text{obesity} + 0.829 \times \text{diabetes mellitus} + 1.501 \times \text{thromboembolic event})$ . |        |        |                         |
| *adjustment for over-fitting by shrinkage factor (SF) (SF = 0.986); the intercept was re-estimated.                                                                                                                                                                                                                                                |        |        |                         |

#### Prediction model for estimation of risk for postoperative bleeding.

| Variable                                                                                                                                       | Regression coefficient | Regression coefficient<br>(adjusted with SF)* | Odds Ratio<br>(95% CI) |
|------------------------------------------------------------------------------------------------------------------------------------------------|------------------------|-----------------------------------------------|------------------------|
| Intercept                                                                                                                                      | -7.182                 | -7.172                                        | -                      |
| Age (years)                                                                                                                                    | 0.033                  | 0.033                                         | 1.034<br>(1.006-1.062) |
| BMI (kg/m <sup>2</sup> )                                                                                                                       | 0.012                  | 0.012                                         | 1.012<br>(0.954-1.073) |
| Smoking status (yes/no)                                                                                                                        | -0.023                 | -0.023                                        | 0.952<br>(0.336-2.701) |
| Heart disease (yes/no)                                                                                                                         | 0.737                  | 0.729                                         | 2.086<br>(1.040-4.183) |
| Vitamin K antagonist use<br>(yes/no)                                                                                                           | 0.796                  | 0.787                                         | 2.220<br>(1.022-4.821) |
| To calculate the absolute risk of postoperative bleeding: $P_{(\text{postoperative bleeding})} = 1/(1+e^{-\text{linear part}}) \times 100\%$ ; |                        |                                               |                        |

Linear part =  $-7.172 + (0.033 \times \text{age} + 0.012 \times \text{BMI} - 0.023 \times \text{smoking status} + 0.729 \times \text{heart disease} + 0.787 \times \text{vitamin K antagonist use})$ .

\*adjustment for over-fitting by shrinkage factor (SF) (SF = 0.989); the intercept was re-estimated.

#### Prediction model for estimation of risk for luxation.

| Variable                                      | Regression coefficient | Regression coefficient<br>(adjusted with SF)* | Odds Ratio<br>(95% CI) |
|-----------------------------------------------|------------------------|-----------------------------------------------|------------------------|
| Intercept                                     | -5.976                 | -5.800                                        | -                      |
| Age (years)                                   | 0.014                  | 0.013                                         | 1.014<br>(0.991-1.038) |
| BMI (kg/m <sup>2</sup> )                      | 0.022                  | 0.021                                         | 1.023<br>(0.951-1.099) |
| Smoking status (yes/no)                       | 0.521                  | 0.491                                         | 1.667<br>(0.651-4.268) |
| Rheumatoid arthritis<br>(yes/no)              | 0.572                  | 0.538                                         | 1.752<br>(0.408-7.530) |
| Disease of central nervous<br>system (yes/no) | 0.113                  | 0.106                                         | 1.113<br>(0.324-3.822) |

To calculate the absolute risk of luxation:  $P_{(\text{luxation})} = 1 / (1 + e^{-\text{linear part}}) \times 100\%$ ;

Linear part =  $-5.800 + (0.013 \times \text{age} + 0.021 \times \text{BMI} + 0.491 \times \text{smoking status} + 0.538 \times \text{rheumatoid arthritis} + 0.106 \times \text{disease of central nervous system})$ .

\*adjustment for over-fitting by shrinkage factor (SF) (SF = 0.941); the intercept was re-estimated.

#### Prediction model for estimation of risk for delirium.

| Variable               | Regression coefficient | Regression coefficient<br>(adjusted with SF)* | Odds Ratio<br>(95% CI) |
|------------------------|------------------------|-----------------------------------------------|------------------------|
| Intercept              | -14.368                | -14.307                                       | -                      |
| Age (years)            | 0.129                  | 0.127                                         | 1.137<br>(1.067-1.212) |
| Heart disease (yes/no) | 0.351                  | 0.348                                         | 1.422                  |

|                                                                                                                                                                                                                                                                                                                                                                                                                   |       |       |                        |
|-------------------------------------------------------------------------------------------------------------------------------------------------------------------------------------------------------------------------------------------------------------------------------------------------------------------------------------------------------------------------------------------------------------------|-------|-------|------------------------|
|                                                                                                                                                                                                                                                                                                                                                                                                                   |       |       | (0.590-3.428)          |
| Disease of central nervous system (yes/no)                                                                                                                                                                                                                                                                                                                                                                        | 0.904 | 0.898 | 2.465<br>(0.936-6.490) |
| <p>To calculate the absolute risk of delirium: <math>P_{(\text{delirium})} = 1/(1+e^{-\text{linear part}}) \times 100\%</math>;</p> <p>Linear part = <math>-14.307 + (0.127 \times \text{age} + 0.348 \times \text{heart disease} + 0.898 \times \text{disease of central nervous system})</math>.</p> <p>*adjustment for over-fitting by shrinkage factor (SF) (SF = 0.993); the intercept was re-estimated.</p> |       |       |                        |

### Prediction model for estimation of risk for nerve damage.

| Variable                                                                                                                                                                                                                                                                                                                                                                                                                        | Regression coefficient | Regression coefficient<br>(adjusted with SF)* | Odds Ratio<br>(95% CI) |
|---------------------------------------------------------------------------------------------------------------------------------------------------------------------------------------------------------------------------------------------------------------------------------------------------------------------------------------------------------------------------------------------------------------------------------|------------------------|-----------------------------------------------|------------------------|
| Intercept                                                                                                                                                                                                                                                                                                                                                                                                                       | -2.209                 | -2.250                                        | -                      |
| Age (years)                                                                                                                                                                                                                                                                                                                                                                                                                     | -0.052                 | -0.051                                        | 0.949<br>(0.926-0.974) |
| Gender (man/woman)                                                                                                                                                                                                                                                                                                                                                                                                              | -0.258                 | -0.254                                        | 0.772<br>(0.319-1.868) |
| Smoking status (yes/no)                                                                                                                                                                                                                                                                                                                                                                                                         | 0.580                  | 0.572                                         | 1.754<br>(0.510-6.029) |
| Dysplasia (yes/no)                                                                                                                                                                                                                                                                                                                                                                                                              | -0.009                 | -0.009                                        | 0.993<br>(0.217-4.552) |
| <p>To calculate the absolute risk of nerve damage: <math>P_{(\text{nerve damage})} = 1/(1+e^{-\text{linear part}}) \times 100\%</math>;</p> <p>Linear part = <math>-2.250 + (-0.051 \times \text{age} - 0.254 \times \text{gender} + 0.572 \times \text{smoking status} - 0.009 \times \text{dysplasia})</math>.</p> <p>*adjustment for over-fitting by shrinkage factor (SF) (SF = 0.987); the intercept was re-estimated.</p> |                        |                                               |                        |

**eFigure 1. ROC curves and Calibration plots**

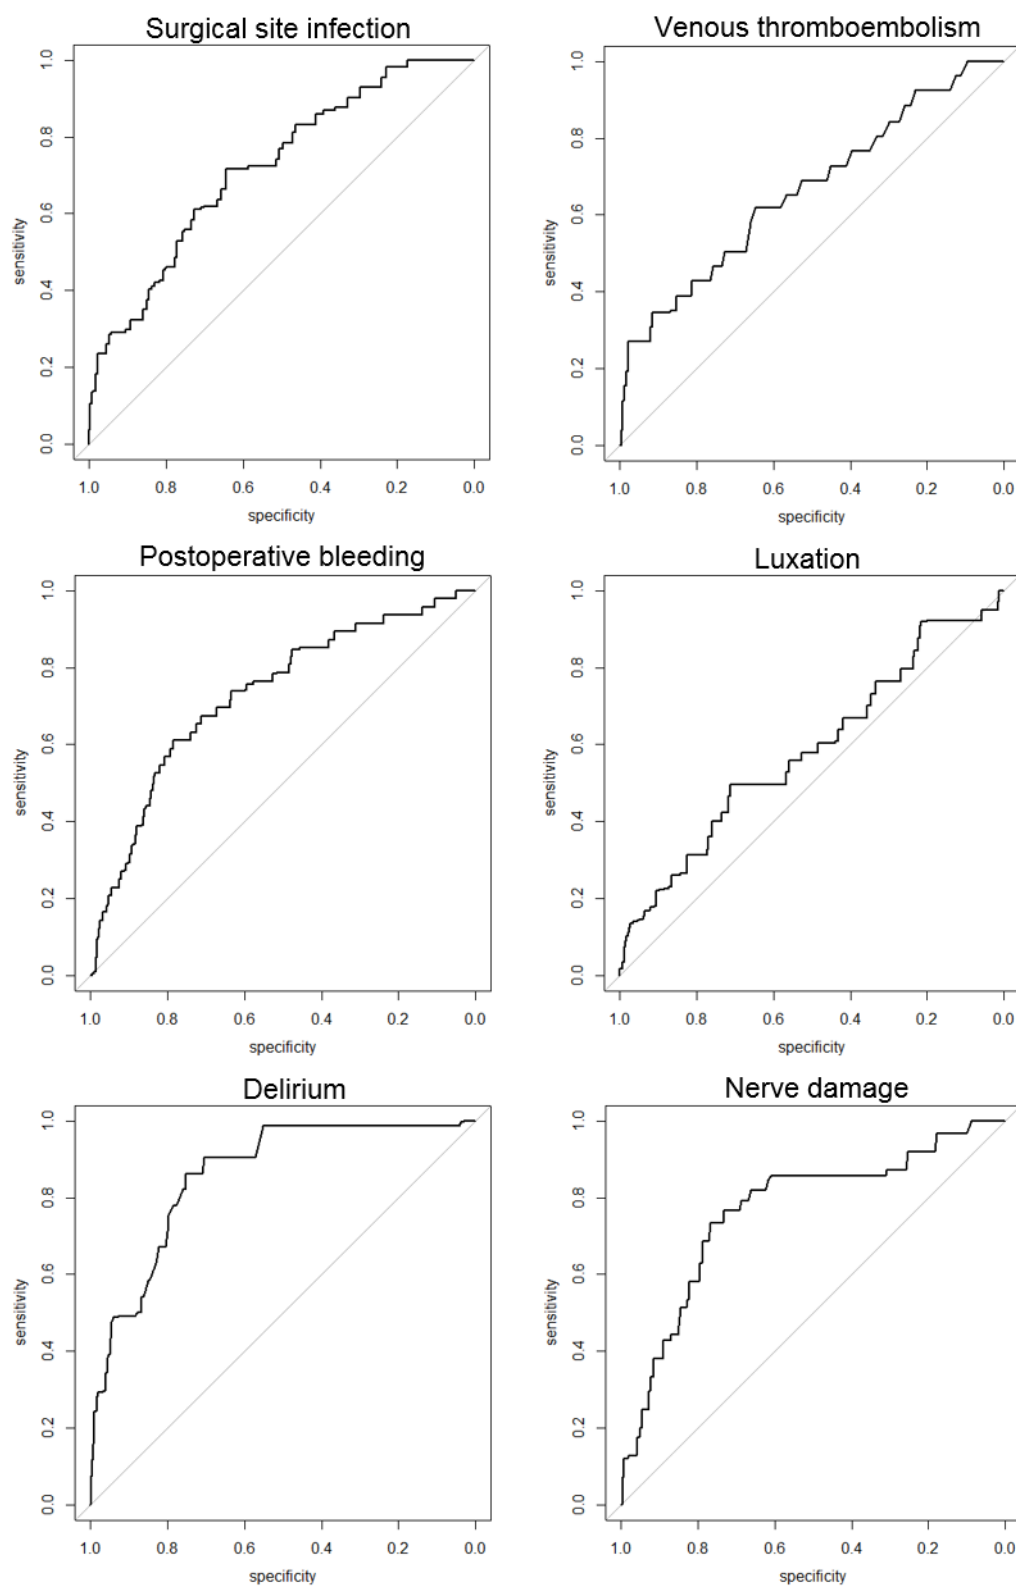

eFigure 1.1. Receiver Operating Characteristic curves of the prediction models for surgical site infection, venous thromboembolism, postoperative bleeding, luxation, delirium and nerve damage

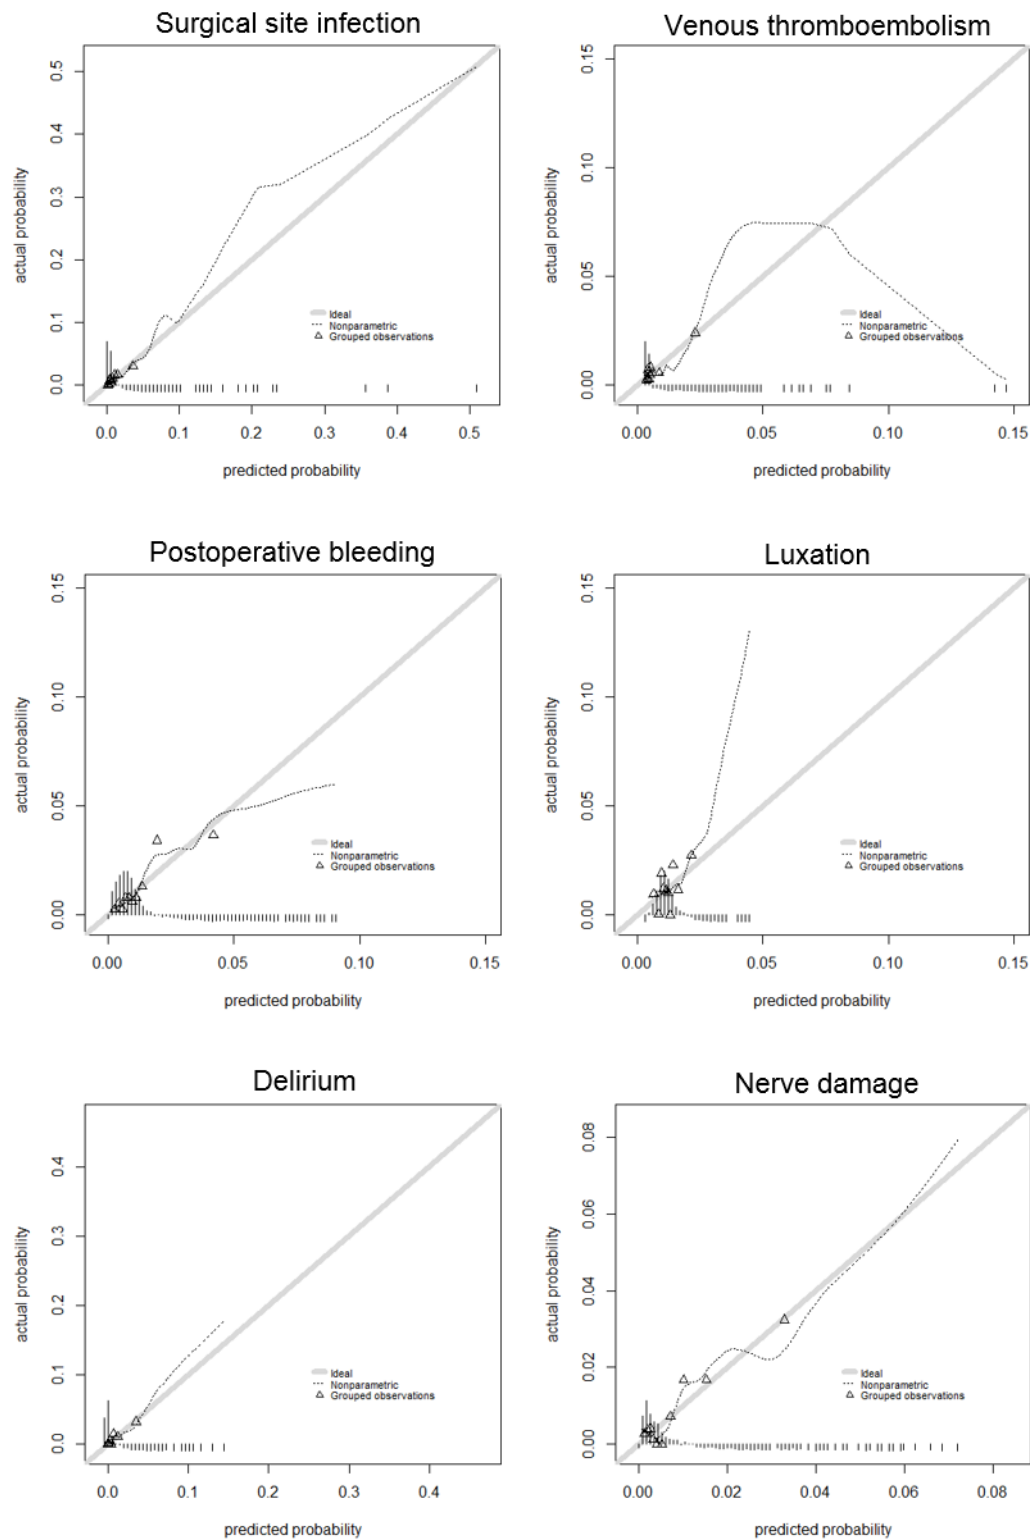

eFigure 1.2. Calibration plots with actual probability against the predicted probability for the models for surgical site infection, venous thromboembolism, postoperative bleeding, luxation, delirium and nerve damage. The triangles indicate quantiles ( $g=10$ ) of patients with a similar predicted probability of success. The grey diagonal line represents perfect agreement between predicted and actual probability

## REFERENCES

1. Almustafa MA, Ewen AM, Deakin AH, Picard F, Clarke JV, Mahmood FF. Risk Factors for Surgical Site Infection Following Lower Limb Arthroplasty: A Retrospective Cohort Analysis of 3932 Lower Limb Arthroplasty Procedures in a High Volume Arthroplasty Unit. *The Journal of Arthroplasty*. 2018;33(6):1861-7.
2. Moller AM, Villebro N, Pedersen T, Tonnesen H. Effect of preoperative smoking intervention on postoperative complications: a randomised clinical trial. *Lancet*. 2002;359(9301):114-7.
3. Namba RS, Paxton L, Fithian DC, Stone ML. Obesity and perioperative morbidity in total hip and total knee arthroplasty patients. *J Arthroplasty*. 2005;20(7 Suppl 3):46-50.
4. Chen J, Cui Y, Li X, Miao X, Wen Z, Xue Y, et al. Risk factors for deep infection after total knee arthroplasty: a meta-analysis. *Arch Orthop Trauma Surg*. 2013;133(5):675-87.
5. Podmore B, Hutchings A, van der Meulen J, Aggarwal A, Konan S. Impact of comorbid conditions on outcomes of hip and knee replacement surgery: a systematic review and meta-analysis. *BMJ Open*. 2018;8(7):e021784.
6. Migita K, Bito S, Nakamura M, Miyata S, Saito M, Kakizaki H, et al. Venous thromboembolism after total joint arthroplasty: results from a Japanese multicenter cohort study. *Arthritis Res Ther*. 2014;16(4):R154-R.
7. Yang G, Meng F, Liu Y, Kong L, Shen Y. Diabetes mellitus and risk of deep vein thrombosis after total knee replacement: a meta-analysis of cohort studies. *Int J Clin Exp Med*. 2015;8(6):9086-92.

- 1  
2  
3 8. Quintero JI, Cardenas LL, Navas M, Bautista MP, Bonilla GA, Llinas AM.  
4  
5 Primary Joint Arthroplasty Surgery: Is the Risk of Major Bleeding Higher in Elderly  
6  
7 Patients? A Retrospective Cohort Study. *J Arthroplasty*. 2016;31(10):2264-8.  
8  
9
- 10 9. Kunutsor SK, Barrett MC, Beswick AD, Judge A, Blom AW, Wylde V, et al. Risk  
11  
12 factors for dislocation after primary total hip replacement: a systematic review and  
13  
14 meta-analysis of 125 studies involving approximately five million hip replacements. *The*  
15  
16 *Lancet Rheumatology*. 2019;1(2):e111-e21.  
17  
18
- 19 10. Huang J, Sprung J, Weingarten TN. Delirium following total joint replacement  
20  
21 surgery. *Bosn J Basic Med Sci*. 2019;19(1):81-5.  
22  
23
- 24 11. Shetty T, Nguyen JT, Wu A, Sasaki M, Bogner E, Burge A, et al. Risk Factors  
25  
26 for Nerve Injury After Total Hip Arthroplasty: A Case-Control Study. *J Arthroplasty*.  
27  
28 2019;34(1):151-6.  
29  
30
- 31 12. Kawano S, Sonohata M, Kitajima M, Mawatari M. Risk Factors for the  
32  
33 Development of Nerve Palsy Following Primary Total Hip Arthroplasty. *Open Orthop*  
34  
35 *J*. 2018;12:164-72.  
36  
37
- 38 13. Farrell CM, Springer BD, Haidukewych GJ, Morrey BF. Motor nerve palsy  
39  
40 following primary total hip arthroplasty. *J Bone Joint Surg Am*. 2005;87(12):2619-25.  
41  
42
- 43 14. ZorginstituutNederland. Farmacotherapeutisch Kompas. 2020 [Available from:  
44  
45 <https://farmacotherapeutischkompas.nl>.  
46  
47  
48  
49  
50  
51  
52  
53  
54  
55  
56  
57  
58  
59  
60



| Input variables*                                       |                         |                         |                        |                        |                        |                        |          |                   |          |                   |              |                   |        |       |        |
|--------------------------------------------------------|-------------------------|-------------------------|------------------------|------------------------|------------------------|------------------------|----------|-------------------|----------|-------------------|--------------|-------------------|--------|-------|--------|
|                                                        | Surgical site infection |                         | Venous thromboembolism |                        | Postoperative bleeding |                        | Luxation |                   | Delirium |                   | Nerve damage |                   |        |       |        |
| Age (years)                                            | 65                      | 0,031                   | 2,015                  | -0,008                 | -0,52                  | 0,033                  | 2,145    | 0,013             | 0,845    | 0,127             | 8,255        | -0,051            | -3,315 |       |        |
| Gender (male/female)                                   | 1                       |                         | 0                      | -0,168                 | -0,168                 |                        | 0        |                   | 0        |                   | 0            | -0,254            | -0,254 |       |        |
| BMI (kg/m <sup>2</sup> )                               | 30                      | -0,002                  | -0,06                  |                        | 0                      | 0,012                  | 0,36     | 0,021             | 0,63     |                   | 0            |                   | 0      |       |        |
| Obesity (yes/no)                                       | 0                       |                         | 0                      | 1,376                  | 0                      |                        | 0        |                   | 0        |                   | 0            |                   | 0      |       |        |
| Smoking status (yes/no)                                | 0                       | 0,757                   | 0                      |                        | 0                      | -0,023                 |          | 0,491             | 0        |                   | 0            | 0,572             | 0      |       |        |
| Lung disease (yes/no)                                  | 0                       |                         | 0                      |                        | 0                      |                        | 0        |                   | 0        |                   | 0            |                   | 0      |       |        |
| Immunological disorder (yes/no)                        | 0                       | 0,891                   | 0                      |                        | 0                      |                        |          |                   | 0        |                   | 0            |                   | 0      |       |        |
| Rheumatoid arthritis (yes/no)                          | 0                       |                         | 0                      |                        | 0                      |                        | 0,538    |                   | 0        |                   | 0            |                   | 0      |       |        |
| Diabetes mellitus (yes/no)                             | 0                       | 0,904                   | 0                      | 0,829                  | 0                      |                        | 0        |                   | 0        |                   | 0            |                   | 0      |       |        |
| Liver disease (yes/no)                                 | 0                       | 2,345                   | 0                      |                        | 0                      |                        | 0        |                   | 0        |                   | 0            |                   | 0      |       |        |
| Heart disease (yes/no)                                 | 0                       |                         | 0                      |                        | 0,729                  |                        | 0        |                   | 0        | 0,348             | 0            |                   | 0      |       |        |
| Disease of central nervous system (yes/no)             | 0                       |                         | 0                      |                        | 0                      |                        | 0,106    |                   | 0,898    |                   | 0            |                   | 0      |       |        |
| Thromboembolic event (yes/no)                          | 0                       |                         | 0                      | 1,501                  | 0                      |                        | 0        |                   | 0        |                   | 0            |                   | 0      |       |        |
| Dysplasia (yes/no)                                     | 0                       |                         | 0                      |                        | 0                      |                        | 0        |                   | 0        |                   | 0            | -0,009            | 0      |       |        |
| Vitamin K antagonist use (yes/no)                      | 0                       |                         | 0                      |                        | 0,787                  |                        | 0        |                   | 0        |                   | 0            |                   | 0      |       |        |
| NSAID use (yes/no)                                     | 0                       | 0,619                   | 0                      |                        | 0                      |                        | 0        |                   | 0        |                   | 0            |                   | 0      |       |        |
|                                                        |                         | -7,272                  | 1,955                  | -4,79                  | -0,688                 | -7,172                 | 2,505    | -5,864            | 1,475    | -4,389            | -14,307      | 8,255             | -6,052 | -2,25 | -3,569 |
|                                                        |                         |                         | -5,317                 |                        | -5,478                 |                        | -4,667   |                   |          |                   |              |                   |        |       | -5,819 |
| <b>Predicted probability for residual symptoms (%)</b> |                         | <b>0,48834885</b>       |                        | <b>0,41602963</b>      |                        | <b>0,93128835</b>      |          | <b>1,22609394</b> |          | <b>0,23476267</b> |              | <b>0,29617761</b> |        |       |        |
|                                                        |                         | surgical site infection |                        | venous thromboembolism |                        | postoperative bleeding |          | luxation          |          | delirium          |              | nerve damage      |        |       |        |

\* Age: in years, Gender: male scored as 1 and female scored as 2, BMI: in kg/m<sup>2</sup>, Obesity: no scored as 0 and yes as 1, Smoking status: no scored as 0 and yes as 1, Lung disease: no scored as 0 and yes as 1, Immunological disorder: no scored as 0 and yes as 1

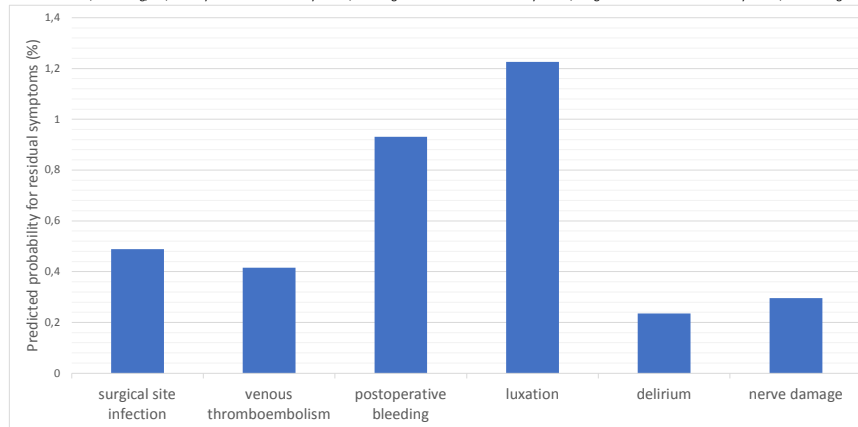

1  
2  
3  
4  
5  
6  
7  
8  
9  
10  
11  
12  
13  
14  
15  
16  
17  
18  
19  
20  
21  
22  
23  
24  
25  
26  
27  
28  
29  
30  
31



For peer review only



1, Rheumatoid arthritis: no scored as 0 and yes as 1, Diabetes mellitus: no scored as 0 and yes as 1, Liver disease: no scored as 0 and yes as 1, Heart disease: no scored as 0 and yes as 1, Disease of the central nervous system: no scored as 0 and yes as 1, Thrombo

1  
2  
3  
4  
5  
6  
7  
8  
9  
10  
11  
12  
13  
14  
15  
16  
17  
18  
19  
20  
21  
22  
23  
24  
25  
26  
27  
28  
29  
30  
31



For peer review only



embolic event: no scored as 0 and yes as 1, Dysplasia: no scored as 0 and yes as 1, Vitamin K antagonists use: no scored as 0 and yes as 1, NSAID's: no scored as 0 and yes as 1

1  
2  
3  
4  
5  
6  
7  
8  
9  
10  
11  
12  
13  
14  
15  
16  
17  
18  
19  
20  
21  
22  
23  
24  
25  
26  
27  
28  
29  
30  
31



For peer review only

## Research checklist. TRIPOD Checklist: Prediction Model Development and Validation

| Section/Topic             | Item |     | Checklist item                                                                                                                                                                                   | Page |
|---------------------------|------|-----|--------------------------------------------------------------------------------------------------------------------------------------------------------------------------------------------------|------|
| <b>Title and abstract</b> |      |     |                                                                                                                                                                                                  |      |
| Title                     | 1    | D;V | Identify the study as developing and/or validating a multivariable prediction model, the target population, and the outcome to be predicted.                                                     | 1    |
| Abstract                  | 2    | D;V | Provide a summary of objectives, study design, setting, participants, sample size, predictors, outcome, statistical analysis, results, and conclusions.                                          | 3    |
| <b>Introduction</b>       |      |     |                                                                                                                                                                                                  |      |
| Background and objectives | 3a   | D;V | Explain the medical context (including whether diagnostic or prognostic) and rationale for developing or validating the multivariable prediction model, including references to existing models. | 5-6  |
|                           | 3b   | D;V | Specify the objectives, including whether the study describes the development or validation of the model or both.                                                                                | 6    |
| <b>Methods</b>            |      |     |                                                                                                                                                                                                  |      |
| Source of data            | 4a   | D;V | Describe the study design or source of data (e.g., randomized trial, cohort, or registry data), separately for the development and validation data sets, if applicable.                          | 7    |
|                           | 4b   | D;V | Specify the key study dates, including start of accrual; end of accrual; and, if applicable, end of follow-up.                                                                                   | 7    |
| Participants              | 5a   | D;V | Specify key elements of the study setting (e.g., primary care, secondary care, general population) including number and location of centres.                                                     | 7    |
|                           | 5b   | D;V | Describe eligibility criteria for participants.                                                                                                                                                  | 7-8  |
|                           | 5c   | D;V | Give details of treatments received, if relevant.                                                                                                                                                | 7-8  |
| Outcome                   | 6a   | D;V | Clearly define the outcome that is predicted by the prediction model, including how and when assessed.                                                                                           | 8    |
|                           | 6b   | D;V | Report any actions to blind assessment of the outcome to be predicted.                                                                                                                           | N/A  |
| Predictors                | 7a   | D;V | Clearly define all predictors used in developing or validating the multivariable prediction model, including how and when they were measured.                                                    | 8    |
|                           | 7b   | D;V | Report any actions to blind assessment of predictors for the outcome and other predictors.                                                                                                       | N/A  |
| Sample size               | 8    | D;V | Explain how the study size was arrived at.                                                                                                                                                       | 8    |
| Missing data              | 9    | D;V | Describe how missing data were handled (e.g., complete-case analysis, single imputation, multiple imputation) with details of any imputation method.                                             | 8-9  |

|                              |     |     |                                                                                                                                                                                                       |                          |
|------------------------------|-----|-----|-------------------------------------------------------------------------------------------------------------------------------------------------------------------------------------------------------|--------------------------|
| Statistical analysis methods | 10a | D   | Describe how predictors were handled in the analyses.                                                                                                                                                 | 9-10                     |
|                              | 10b | D   | Specify type of model, all model-building procedures (including any predictor selection), and method for internal validation.                                                                         | 9-10                     |
|                              | 10c | V   | For validation, describe how the predictions were calculated.                                                                                                                                         | 9-10                     |
|                              | 10d | D;V | Specify all measures used to assess model performance and, if relevant, to compare multiple models.                                                                                                   | 9-10                     |
|                              | 10e | V   | Describe any model updating (e.g., recalibration) arising from the validation, if done.                                                                                                               | N/A                      |
| Risk groups                  | 11  | D;V | Provide details on how risk groups were created, if done.                                                                                                                                             | N/A                      |
| Development vs. validation   | 12  | V   | For validation, identify any differences from the development data in setting, eligibility criteria, outcome, and predictors.                                                                         | N/A                      |
| <b>Results</b>               |     |     |                                                                                                                                                                                                       |                          |
| Participants                 | 13a | D;V | Describe the flow of participants through the study, including the number of participants with and without the outcome and, if applicable, a summary of the follow-up time. A diagram may be helpful. | 11, Figure 1             |
|                              | 13b | D;V | Describe the characteristics of the participants (basic demographics, clinical features, available predictors), including the number of participants with missing data for predictors and outcome.    | 11, Table 1              |
|                              | 13c | V   | For validation, show a comparison with the development data of the distribution of important variables (demographics, predictors and outcome).                                                        | N/A                      |
| Model development            | 14a | D   | Specify the number of participants and outcome events in each analysis.                                                                                                                               | 11, Table 1              |
|                              | 14b | D   | If done, report the unadjusted association between each candidate predictor and outcome.                                                                                                              | eTable 5                 |
| Model specification          | 15a | D   | Present the full prediction model to allow predictions for individuals (i.e., all regression coefficients, and model intercept or baseline survival at a given time point).                           | Table 2, eTable 5        |
|                              | 15b | D   | Explain how to use the prediction model.                                                                                                                                                              | Table 2, eTable 5, 11-12 |
| Model performance            | 16  | D;V | Report performance measures (with CIs) for the prediction model.                                                                                                                                      | Table 2, eTable 5        |
| Model-updating               | 17  | V   | If done, report the results from any model updating (i.e., model specification, model performance).                                                                                                   | N/A                      |
| <b>Discussion</b>            |     |     |                                                                                                                                                                                                       |                          |
| Limitations                  | 18  | D;V | Discuss any limitations of the study (such as nonrepresentative sample,                                                                                                                               | 18-20                    |

|                           |     |     |                                                                                                                                                |       |
|---------------------------|-----|-----|------------------------------------------------------------------------------------------------------------------------------------------------|-------|
|                           |     |     | few events per predictor, missing data).                                                                                                       |       |
| Interpretation            | 19a | V   | For validation, discuss the results with reference to performance in the development data, and any other validation data.                      | 18-20 |
|                           | 19b | D;V | Give an overall interpretation of the results, considering objectives, limitations, results from similar studies, and other relevant evidence. | 18-20 |
| Implications              | 20  | D;V | Discuss the potential clinical use of the model and implications for future research.                                                          | 18-20 |
| <b>Other information</b>  |     |     |                                                                                                                                                |       |
| Supplementary information | 21  | D;V | Provide information about the availability of supplementary resources, such as study protocol, Web calculator, and data sets.                  | 20    |
| Funding                   | 22  | D;V | Give the source of funding and the role of the funders for the present study.                                                                  | 21    |

\*Items relevant only to the development of a prediction model are denoted by D, items relating solely to a validation of a prediction model are denoted by V, and items relating to both are denoted D;V. We recommend using the TRIPOD Checklist in conjunction with the TRIPOD Explanation and Elaboration document.
