# Supplementary material for: Development of prediction models for complications after primary total hip and knee arthroplasty: a single-centre retrospective cohort study in the Netherlands
Source: HighWire-hosted journal article supplement (doi:10.1136/bmjopen-2022-062065), 2022-08-01
Supplement: bmjopen-2022-062065supp001_data_supplement.pdf [file bmjopen-2022-062065supp001_data_supplement.pdf]

**Supplemental Material**

|                                                                |    |
|----------------------------------------------------------------|----|
| eTable 1. Categorization of surgical complications             | 2  |
| eTable 2. Predictors per outcome                               | 4  |
| eTable 3. Categorization of comorbidities                      | 6  |
| eTable 4. Categorization of drug groups                        | 9  |
| eTable 5. Original prediction models and adjusted coefficients | 11 |
| eFigure 1. ROC curves and Calibration plots                    | 15 |
| References                                                     | 17 |

**eTable 1. Categorization of surgical complications**

| <b>Surgical site infection*</b> |                        |                               |                              |
|---------------------------------|------------------------|-------------------------------|------------------------------|
| Location code**                 | Location**             | Code nature of complication** | Nature of complication**     |
| 24                              | Pelvis                 | 012                           | Prosthesis infection         |
| 40                              | Hip                    | 083                           | Deep infection               |
| 42                              | Knee                   | 134                           | Infected organ               |
| <b>Venous thromboembolism</b>   |                        |                               |                              |
| 24                              | Pelvis                 | 104                           | Thrombosis                   |
| 40                              | Hip                    | 105                           | Embolus                      |
| 41                              | Femur/upper leg        |                               |                              |
| 42                              | Knee                   |                               |                              |
| 43                              | Lower leg              |                               |                              |
| 50                              | Lung                   |                               |                              |
| 56                              | Venous system          |                               |                              |
| <b>Luxation</b>                 |                        |                               |                              |
| 40                              | Hip                    | 041                           | Luxation                     |
|                                 |                        | 086                           | Disconnection prosthesis     |
| <b>Delirium</b>                 |                        |                               |                              |
| 54                              | Central nervous system | 141                           | Psychological decompensation |
| 58                              | Total                  |                               |                              |
| <b>Nerve damage</b>             |                        |                               |                              |
| 40                              | Hip                    | 094                           | Nerve lesion                 |
| 41                              | Femur/upper leg        |                               |                              |
| 43                              | Lower leg              |                               |                              |
| 57                              | Arterial system        |                               |                              |
| <b>Postoperative bleeding</b>   |                        |                               |                              |
| 40                              | Hip                    | 014                           | Wound leakage                |
| 41                              | Femur/upper leg        | 022                           | Bleeding                     |

|    |               |     |                                     |
|----|---------------|-----|-------------------------------------|
| 42 | Knee          | 100 | Secondary                           |
| 56 | Venous system | 136 | bleeding/hematoma<br>Bleeding organ |

\* the records registered with the nature of complication 010 (infection around sutures), 011 (superficial infection), 013 (local wound necrosis) and 014 (wound leakage) are checked for occurrence of surgical site infection and added to the outcome surgical site infection when this was the case.

\*\* only depicted when location code or code of the nature of complication occurred in the register.

Furthermore records registered with nature of complication 125 (interruption of sterility) were checked for occurrence of a surgical complication.

**eTable 2. Predictors per outcome**

|                                     | OR*/RR** (95% CI)  | Study                      |
|-------------------------------------|--------------------|----------------------------|
| Surgical site infection             |                    |                            |
| Age                                 |                    |                            |
| <i>THA (&gt;70years)</i>            | 0.7** (0.3-1.5)    | Almustafa et al (2018) (1) |
| <i>TKA (&gt;70years)</i>            | 1.7** (0.9-3.3)    | Almustafa et al (2018) (1) |
| Smoking status                      | 0.16** (0.05-0.52) | Møller et al (2002) (2)    |
| BMI                                 | 6.7* (NR)          | Namba et al (2005) (3)     |
|                                     | 4.8** (1.9-12.0)   | Almustafa et al (2018) (1) |
|                                     | 2.53* (1.25-5.13)  | Chen et al (2013) (4)      |
| Immunological disorder              | -                  | <i>Clinical reasoning</i>  |
| NSAID's                             | -                  | <i>Clinical reasoning</i>  |
| Diabetes mellitus                   | 1.90* (1.32-2.74)  | Podmore et al (2018) (5)   |
| Liver disease                       | 2.46* (1.46-4.12)  | Podmore et al (2018) (5)   |
| Venous thromboembolism              |                    |                            |
| Age                                 |                    |                            |
| <i>THA(≥75years)</i>                | 1.82* (1.15-2.87)  | Migita et al (2014) (6)    |
| <i>TKA(≥75years)</i>                | 1.30* (0.99-1.71)  | Migita et al (2014) (6)    |
| Sex                                 |                    |                            |
| <i>THA(female&gt;risk)</i>          | 2.31* (1.03-5.18)  | Migita et al (2014) (6)    |
| <i>TKA(female&gt;risk)</i>          | 1.58* (1.08-2.31)  | Migita et al (2014) (6)    |
| Diabetes mellitus                   | 1.26* (0.92-1.72)  | Podmore et al (2018) (5)   |
| <i>(TKA)</i>                        | 1.36* (1.07-1.72)  | Yang et al (2015) (7)      |
| Thromboembolic event ( <i>TKA</i> ) | 1.11* (0.36-3.46)  | Migita et al (2014) (6)    |
| Obesity                             |                    |                            |
| <i>THA(BMI&gt;30)</i>               | 0.89* (0.36-2.20)  | Migita et al (2014) (6)    |
| <i>TKA(BMI&gt;30)</i>               | 0.90* (0.58-1.38)  | Migita et al (2014) (6)    |
| Postoperative bleeding              |                    |                            |
| Age                                 |                    |                            |
| <i>THA(&gt;70 years)</i>            | 2.61** (1.50-4.53) | Quintero et al (2016) (8)  |

|                                                                               |                    |                            |
|-------------------------------------------------------------------------------|--------------------|----------------------------|
| <i>TKA(&gt;70years)</i>                                                       | 2.25** (1.03-4.94) | Quintero et al (2016) (8)  |
| BMI                                                                           | -                  | <i>Clinical reasoning</i>  |
| Heart disease                                                                 | -                  | <i>Univariate analysis</i> |
| Vitamin K antagonists                                                         | -                  | <i>Clinical reasoning</i>  |
| Smoking status                                                                | -                  | <i>Univariate analysis</i> |
| Luxation                                                                      |                    |                            |
| Age                                                                           | 1.27* (1.02-1.57)  | Kunutsor et al (2019) (9)  |
| Smoking status                                                                | 1.08* (0.96-1.21)  | Kunutsor et al (2019) (9)  |
| BMI                                                                           | 1.38* (1.03-1.85)  | Kunutsor et al (2019) (9)  |
| Rheumatoid arthritis                                                          | 1.50* (1.05-2.15)  | Kunutsor et al (2019) (9)  |
| Disease of the central nervous system                                         | 2.54* (1.86-3.48)  | Kunutsor et al (2019) (9)  |
| Delirium                                                                      |                    |                            |
| Age                                                                           | 2.20* (1.80-2.71)  | Huang et al (2019) (10)    |
| Disease of the central nervous system ( <i>dementia</i> )                     | 7.44* (3.54-14.60) | Huang et al (2019) (10)    |
| Heart disease ( <i>congestive</i> )                                           | 0.83* (0.39-1.61)  | Huang et al (2019) (10)    |
| Nerve damage                                                                  |                    |                            |
| Age (<45 vs 65-74)                                                            | 7.17* (1.17-44.00) | Shetty et al (2016) (11)   |
| BMI (<BMI >risk)                                                              | 0.96* (0.77-1.21)  | Kawano et al (2018) (12)   |
| Sex ( <i>female &gt; risk</i> )                                               | Not reported       | Shetty et al (2016) (11)   |
| Smoking status                                                                | 1.90* (1.06-3.38)  | Shetty et al (2016) (11)   |
| Dysplasia                                                                     | 3.69* (1.65-8.28)  | Farrell et al (2005) (13)  |
| *results reported as odds ratio (OR); ** results reported as risk ratio (RR). |                    |                            |

**eTable 3. Categorization of comorbidities**

| <b>Categorization of comorbidities</b> |                                                                                                                                                                                                                                                                                    |
|----------------------------------------|------------------------------------------------------------------------------------------------------------------------------------------------------------------------------------------------------------------------------------------------------------------------------------|
| <b>Comorbid category*</b>              | <b>Included comorbid conditions**</b>                                                                                                                                                                                                                                              |
| Bleeding diseases                      | Hemophilia                                                                                                                                                                                                                                                                         |
| Blood quality                          | Anemia                                                                                                                                                                                                                                                                             |
| Cancer                                 | Prostate cancer<br>Leukemia<br>Breast cancer<br>Lymph node cancer<br>Bowen's disease                                                                                                                                                                                               |
| Central nervous system                 | Parkinson's disease<br>Dementia<br>TIA<br>CVA                                                                                                                                                                                                                                      |
| Cognitive impairment                   | Down syndrome                                                                                                                                                                                                                                                                      |
| Diabetes mellitus                      | Diabetes mellitus                                                                                                                                                                                                                                                                  |
| Heart disease                          | Ischemia of the heart<br>Valve damage blood regurgitation<br>Valve damage reduced blood flow<br>Valve replacement<br>Cardiomyopathy decreased contraction<br>Cardiomyopathy decreased relaxation<br>Heart decompensation<br>Heart attack<br>Angina pectoris<br>Atrial fibrillation |
| High blood pressure                    | Hypertension                                                                                                                                                                                                                                                                       |
| Hyper hormonal                         | Hyper hormonal                                                                                                                                                                                                                                                                     |
| Hypo hormonal                          | Hypo hormonal                                                                                                                                                                                                                                                                      |

|                            |                                                                                                                                                      |
|----------------------------|------------------------------------------------------------------------------------------------------------------------------------------------------|
| Immunological disorder     | Scleroderma<br>Rheumatoid arthritis<br>Gout<br>Psoriasis<br>Artritides<br>Dermal barrier disease<br>General immune disorder<br>Organ transplantation |
| Inflammation               | Chronic bladder infection                                                                                                                            |
| Kidney disease             | Kidney insufficiency                                                                                                                                 |
| Liver disease              | Liver cirrhosis                                                                                                                                      |
| Lung disease               | Chronic bronchitis<br>Asthma<br>COPD<br>Emphysema<br>Dyspnea                                                                                         |
| Mood sickness              | Depression<br>Psychosis                                                                                                                              |
| Obesity                    | Obesity                                                                                                                                              |
| Peripheral nervous system  | Nerve compression<br>Lumbar vertebral stenosis                                                                                                       |
| Poor peripheral blood flow | Atherosclerosis<br>Claudication intermittent                                                                                                         |
| Thromboembolic event       | Deep venous thromboembolism<br>Pulmonary embolism                                                                                                    |

\* the comorbid categories are used for analysis.

\*\* comorbid conditions are depicted when the frequency was  $\geq 10$  or when the comorbid condition was considered as a relevant comorbid condition in terms of outcome prediction.



**eTable 4. Categorization of drug groups**

| <b>Categorization of medication use</b> |                                                                                    |
|-----------------------------------------|------------------------------------------------------------------------------------|
| <b>Drug category</b>                    | <b>Drugs groups according to the Dutch pharmacotherapeutic compass (14)</b>        |
| Acenocoumarol                           | Acenocoumarol*                                                                     |
| Antifibrinolytica                       | Antifibrinolytica                                                                  |
| Antimycotics                            | Antimycotic antibiotics<br>Others                                                  |
| Antiretroviral agents                   | Antiretroviral agents                                                              |
| Bisfosfonates                           | Bisfosfonates                                                                      |
| Colchicine group                        | Colchicine group                                                                   |
| Directly working oral anticoagulants    | Directly working oral anticoagulants                                               |
| DMARD's biologicals                     | Immunosuppressives selective<br>Immunosuppressives others                          |
| Factors in blood coagulance             | Factors in blood coagulance                                                        |
| Fenprocoumon                            | Fenprocoumon*                                                                      |
| Imidazoles                              | Cutane imidazoles<br>Others                                                        |
| Immunosuppressives                      | Interferons<br>Interleukin antagonists<br>Monoclonal antibodies                    |
| Local antibacterial agents              | Cutaneous<br>antibacterial agents<br>Ocular antibacterial agents                   |
| Local corticosteroids                   | Cutane corticosteroids<br>Nasal corticosteroids<br>Corticosteroides for inhalation |
| Low molecular weight heparins           | Low molecular weight heparins                                                      |
| Methotrexate                            | Methotrexate                                                                       |

|                                 |                                                                                                                                                                                                                                           |
|---------------------------------|-------------------------------------------------------------------------------------------------------------------------------------------------------------------------------------------------------------------------------------------|
| NSAID's**                       | Coxib's<br>Others                                                                                                                                                                                                                         |
| Oncology related detoxificants  | Oncology related detoxificants                                                                                                                                                                                                            |
| Salicylates                     | Analgetic salicylates<br>Trombocytic salicylates                                                                                                                                                                                          |
| Statins                         | Statins                                                                                                                                                                                                                                   |
| Systemic antibacterial agents   | Cephalosporins<br>Macrolides<br>Penicillin's<br>Tetracyclines<br>Carbapenems<br>Ceftriaxone<br>Glycopeptides<br>Aminoglycosides<br>Rifamycins tuberculose<br>Sulfonamides and trimethoprimides<br>Triazoles<br>Fluoroquinolones<br>Others |
| Thrombocyte-aggregationblockers | P2y12 blockers<br>Others                                                                                                                                                                                                                  |
| Xanthineoxidase inhibitor       | Xanthineoxidase inhibitor                                                                                                                                                                                                                 |

\* according the Dutch pharmacotherapeutic compass, acenocoumarol and fenprocoumon belong to the drug group 'vitamin k antagonists'. Based on expert opinion, acenocoumarol and fenprocoumon were included separately in the analysis because of the differences in half-life.

\*\* Non-Steroidal Anti-Inflammatory Drugs

**eTable 5. Original prediction models and adjusted coefficients**

## Prediction model for estimation of risk for surgical site infection

| Variable                                                                                                                                                                                                                                                                                                                                                                                                                                                                                                                                  | Regression coefficient | Regression coefficient<br>(adjusted with SF)* | Odds Ratio<br>(95% CI)   |
|-------------------------------------------------------------------------------------------------------------------------------------------------------------------------------------------------------------------------------------------------------------------------------------------------------------------------------------------------------------------------------------------------------------------------------------------------------------------------------------------------------------------------------------------|------------------------|-----------------------------------------------|--------------------------|
| Intercept                                                                                                                                                                                                                                                                                                                                                                                                                                                                                                                                 | -7.305                 | -7.272                                        | -                        |
| Age (years)                                                                                                                                                                                                                                                                                                                                                                                                                                                                                                                               | 0.031                  | 0.031                                         | 1.032<br>(1.005-1.059)   |
| BMI (kg/m <sup>2</sup> )                                                                                                                                                                                                                                                                                                                                                                                                                                                                                                                  | -0.002                 | -0.002                                        | 0.998<br>(0.937-1.063)   |
| Smoking status (yes/no)                                                                                                                                                                                                                                                                                                                                                                                                                                                                                                                   | 0.769                  | 0.757                                         | 2.145<br>(0.883-5.213)   |
| Immunological disorder<br>(yes/no)                                                                                                                                                                                                                                                                                                                                                                                                                                                                                                        | 0.905                  | 0.891                                         | 2.474<br>(1.186-5.158)   |
| Diabetes mellitus (yes/no)                                                                                                                                                                                                                                                                                                                                                                                                                                                                                                                | 0.918                  | 0.904                                         | 2.494<br>(1.125-5.529)   |
| Liver disease (yes/no)                                                                                                                                                                                                                                                                                                                                                                                                                                                                                                                    | 2.382                  | 2.345                                         | 10.659<br>(2.441-46.555) |
| NSAID's (yes/no)                                                                                                                                                                                                                                                                                                                                                                                                                                                                                                                          | 0.629                  | 0.619                                         | 1.877<br>(0.946-3.725)   |
| To calculate the absolute risk of surgical site infection: $P_{(\text{surgical site infection})} = 1 / (1 + e^{-\text{linear part}}) \times 100\%$ ;<br>Linear part = $-7.272 + (0.031 \times \text{age} - 0.002 \times \text{BMI} + 0.757 \times \text{smoking status} + 0.891 \times \text{immunological disorder} + 0.904 \times \text{diabetes mellitus} + 2.345 \times \text{liver disease} + 0.619 \times \text{NSAID's})$ .<br>*adjustment for over-fitting by shrinkage factor (SF) (SF = 0.984); the intercept was re-estimated. |                        |                                               |                          |

## Prediction model for estimation of risk for venous thromboembolism

| Variable    | Regression coefficient | Regression coefficient<br>(adjusted with SF)* | Odds Ratio<br>(95% CI) |
|-------------|------------------------|-----------------------------------------------|------------------------|
| Intercept   | -4.764                 | -4.790                                        | -                      |
| Age (years) | -0.009                 | -0.008                                        | 0.991                  |

|                                                                                                                                                                                                                                                                                                                                                    |        |        |                         |
|----------------------------------------------------------------------------------------------------------------------------------------------------------------------------------------------------------------------------------------------------------------------------------------------------------------------------------------------------|--------|--------|-------------------------|
|                                                                                                                                                                                                                                                                                                                                                    |        |        | (0.966-1.018)           |
| Gender (male/female)                                                                                                                                                                                                                                                                                                                               | -0.170 | -0.168 | 0.844<br>(0.377-1.888)  |
| Obesity (yes/no)                                                                                                                                                                                                                                                                                                                                   | 1.396  | 1.376  | 4.040<br>(1.462-11.159) |
| Diabetes mellitus (yes/no)                                                                                                                                                                                                                                                                                                                         | 0.841  | 0.829  | 2.317<br>(0.870-6.173)  |
| Thromboembolic event<br>(yes/no)                                                                                                                                                                                                                                                                                                                   | 1.523  | 1.501  | 4.586<br>(1.521-13.826) |
| To calculate the absolute risk of venous thromboembolism: $P_{(\text{venous thromboembolism})} = 1/(1+e^{-\text{linear part}}) \times 100\%$ ; Linear part = $-4.790 + (-0.008 \times \text{age} - 0.168 \times \text{gender} + 1.376 \times \text{obesity} + 0.829 \times \text{diabetes mellitus} + 1.501 \times \text{thromboembolic event})$ . |        |        |                         |
| *adjustment for over-fitting by shrinkage factor (SF) (SF = 0.986); the intercept was re-estimated.                                                                                                                                                                                                                                                |        |        |                         |

#### Prediction model for estimation of risk for postoperative bleeding.

| Variable                                                                                                                                       | Regression coefficient | Regression coefficient<br>(adjusted with SF)* | Odds Ratio<br>(95% CI) |
|------------------------------------------------------------------------------------------------------------------------------------------------|------------------------|-----------------------------------------------|------------------------|
| Intercept                                                                                                                                      | -7.182                 | -7.172                                        | -                      |
| Age (years)                                                                                                                                    | 0.033                  | 0.033                                         | 1.034<br>(1.006-1.062) |
| BMI (kg/m <sup>2</sup> )                                                                                                                       | 0.012                  | 0.012                                         | 1.012<br>(0.954-1.073) |
| Smoking status (yes/no)                                                                                                                        | -0.023                 | -0.023                                        | 0.952<br>(0.336-2.701) |
| Heart disease (yes/no)                                                                                                                         | 0.737                  | 0.729                                         | 2.086<br>(1.040-4.183) |
| Vitamin K antagonist use<br>(yes/no)                                                                                                           | 0.796                  | 0.787                                         | 2.220<br>(1.022-4.821) |
| To calculate the absolute risk of postoperative bleeding: $P_{(\text{postoperative bleeding})} = 1/(1+e^{-\text{linear part}}) \times 100\%$ ; |                        |                                               |                        |

Linear part =  $-7.172 + (0.033 \times \text{age} + 0.012 \times \text{BMI} - 0.023 \times \text{smoking status} + 0.729 \times \text{heart disease} + 0.787 \times \text{vitamin K antagonist use})$ .

\*adjustment for over-fitting by shrinkage factor (SF) (SF = 0.989); the intercept was re-estimated.

#### Prediction model for estimation of risk for luxation.

| Variable                                                                                                                                                                                                                                                                                                                                                                                                                                            | Regression coefficient | Regression coefficient<br>(adjusted with SF)* | Odds Ratio<br>(95% CI) |
|-----------------------------------------------------------------------------------------------------------------------------------------------------------------------------------------------------------------------------------------------------------------------------------------------------------------------------------------------------------------------------------------------------------------------------------------------------|------------------------|-----------------------------------------------|------------------------|
| Intercept                                                                                                                                                                                                                                                                                                                                                                                                                                           | -5.976                 | -5.800                                        | -                      |
| Age (years)                                                                                                                                                                                                                                                                                                                                                                                                                                         | 0.014                  | 0.013                                         | 1.014<br>(0.991-1.038) |
| BMI (kg/m <sup>2</sup> )                                                                                                                                                                                                                                                                                                                                                                                                                            | 0.022                  | 0.021                                         | 1.023<br>(0.951-1.099) |
| Smoking status (yes/no)                                                                                                                                                                                                                                                                                                                                                                                                                             | 0.521                  | 0.491                                         | 1.667<br>(0.651-4.268) |
| Rheumatoid arthritis<br>(yes/no)                                                                                                                                                                                                                                                                                                                                                                                                                    | 0.572                  | 0.538                                         | 1.752<br>(0.408-7.530) |
| Disease of central nervous<br>system (yes/no)                                                                                                                                                                                                                                                                                                                                                                                                       | 0.113                  | 0.106                                         | 1.113<br>(0.324-3.822) |
| To calculate the absolute risk of luxation: $P_{(\text{luxation})} = 1/(1+e^{-\text{linear part}}) \times 100\%$ ;<br>Linear part = $-5.800 + (0.013 \times \text{age} + 0.021 \times \text{BMI} + 0.491 \times \text{smoking status} + 0.538 \times \text{rheumatoid arthritis} + 0.106 \times \text{disease of central nervous system})$ .<br>*adjustment for over-fitting by shrinkage factor (SF) (SF = 0.941); the intercept was re-estimated. |                        |                                               |                        |

#### Prediction model for estimation of risk for delirium.

| Variable               | Regression coefficient | Regression coefficient<br>(adjusted with SF)* | Odds Ratio<br>(95% CI) |
|------------------------|------------------------|-----------------------------------------------|------------------------|
| Intercept              | -14.368                | -14.307                                       | -                      |
| Age (years)            | 0.129                  | 0.127                                         | 1.137<br>(1.067-1.212) |
| Heart disease (yes/no) | 0.351                  | 0.348                                         | 1.422                  |

|                                                                                                                                                                                                                                                                                                                                                                                                                   |       |       |                        |
|-------------------------------------------------------------------------------------------------------------------------------------------------------------------------------------------------------------------------------------------------------------------------------------------------------------------------------------------------------------------------------------------------------------------|-------|-------|------------------------|
|                                                                                                                                                                                                                                                                                                                                                                                                                   |       |       | (0.590-3.428)          |
| Disease of central nervous system (yes/no)                                                                                                                                                                                                                                                                                                                                                                        | 0.904 | 0.898 | 2.465<br>(0.936-6.490) |
| <p>To calculate the absolute risk of delirium: <math>P_{(\text{delirium})} = 1/(1+e^{-\text{linear part}}) \times 100\%</math>;</p> <p>Linear part = <math>-14.307 + (0.127 \times \text{age} + 0.348 \times \text{heart disease} + 0.898 \times \text{disease of central nervous system})</math>.</p> <p>*adjustment for over-fitting by shrinkage factor (SF) (SF = 0.993); the intercept was re-estimated.</p> |       |       |                        |

#### Prediction model for estimation of risk for nerve damage.

| Variable                                                                                                                                                                                                                                                                                                                                                                                                                        | Regression coefficient | Regression coefficient (adjusted with SF)* | Odds Ratio (95% CI)    |
|---------------------------------------------------------------------------------------------------------------------------------------------------------------------------------------------------------------------------------------------------------------------------------------------------------------------------------------------------------------------------------------------------------------------------------|------------------------|--------------------------------------------|------------------------|
| Intercept                                                                                                                                                                                                                                                                                                                                                                                                                       | -2.209                 | -2.250                                     | -                      |
| Age (years)                                                                                                                                                                                                                                                                                                                                                                                                                     | -0.052                 | -0.051                                     | 0.949<br>(0.926-0.974) |
| Gender (man/woman)                                                                                                                                                                                                                                                                                                                                                                                                              | -0.258                 | -0.254                                     | 0.772<br>(0.319-1.868) |
| Smoking status (yes/no)                                                                                                                                                                                                                                                                                                                                                                                                         | 0.580                  | 0.572                                      | 1.754<br>(0.510-6.029) |
| Dysplasia (yes/no)                                                                                                                                                                                                                                                                                                                                                                                                              | -0.009                 | -0.009                                     | 0.993<br>(0.217-4.552) |
| <p>To calculate the absolute risk of nerve damage: <math>P_{(\text{nerve damage})} = 1/(1+e^{-\text{linear part}}) \times 100\%</math>;</p> <p>Linear part = <math>-2.250 + (-0.051 \times \text{age} - 0.254 \times \text{gender} + 0.572 \times \text{smoking status} - 0.009 \times \text{dysplasia})</math>.</p> <p>*adjustment for over-fitting by shrinkage factor (SF) (SF = 0.987); the intercept was re-estimated.</p> |                        |                                            |                        |

**eFigure 1. ROC curves and Calibration plots**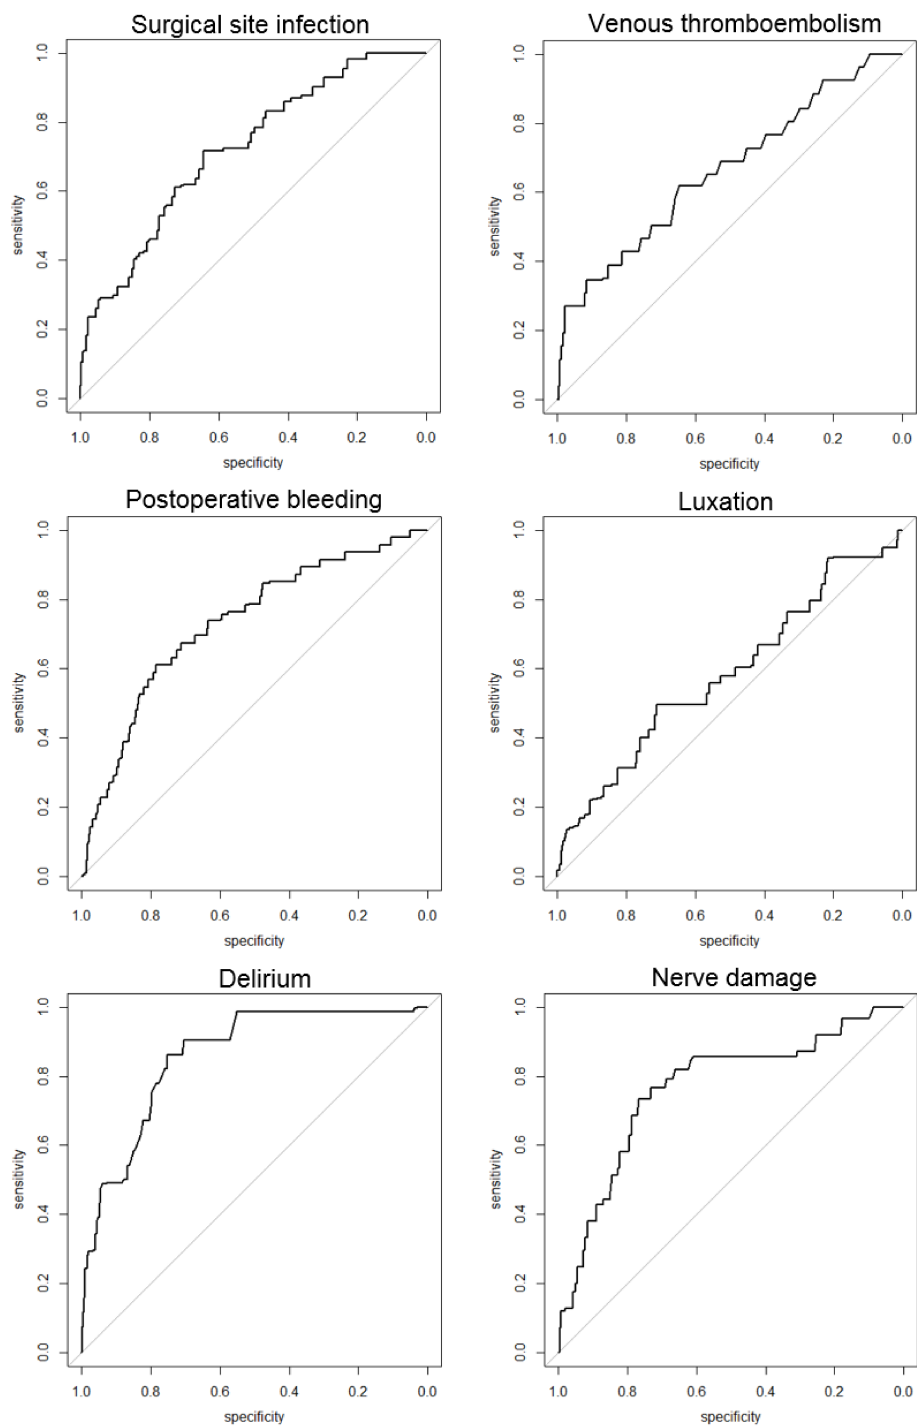**eFigure 1.1.** Receiver Operating Characteristic curves of the prediction models for surgical site infection, venous thromboembolism, postoperative bleeding, luxation, delirium and nerve damage

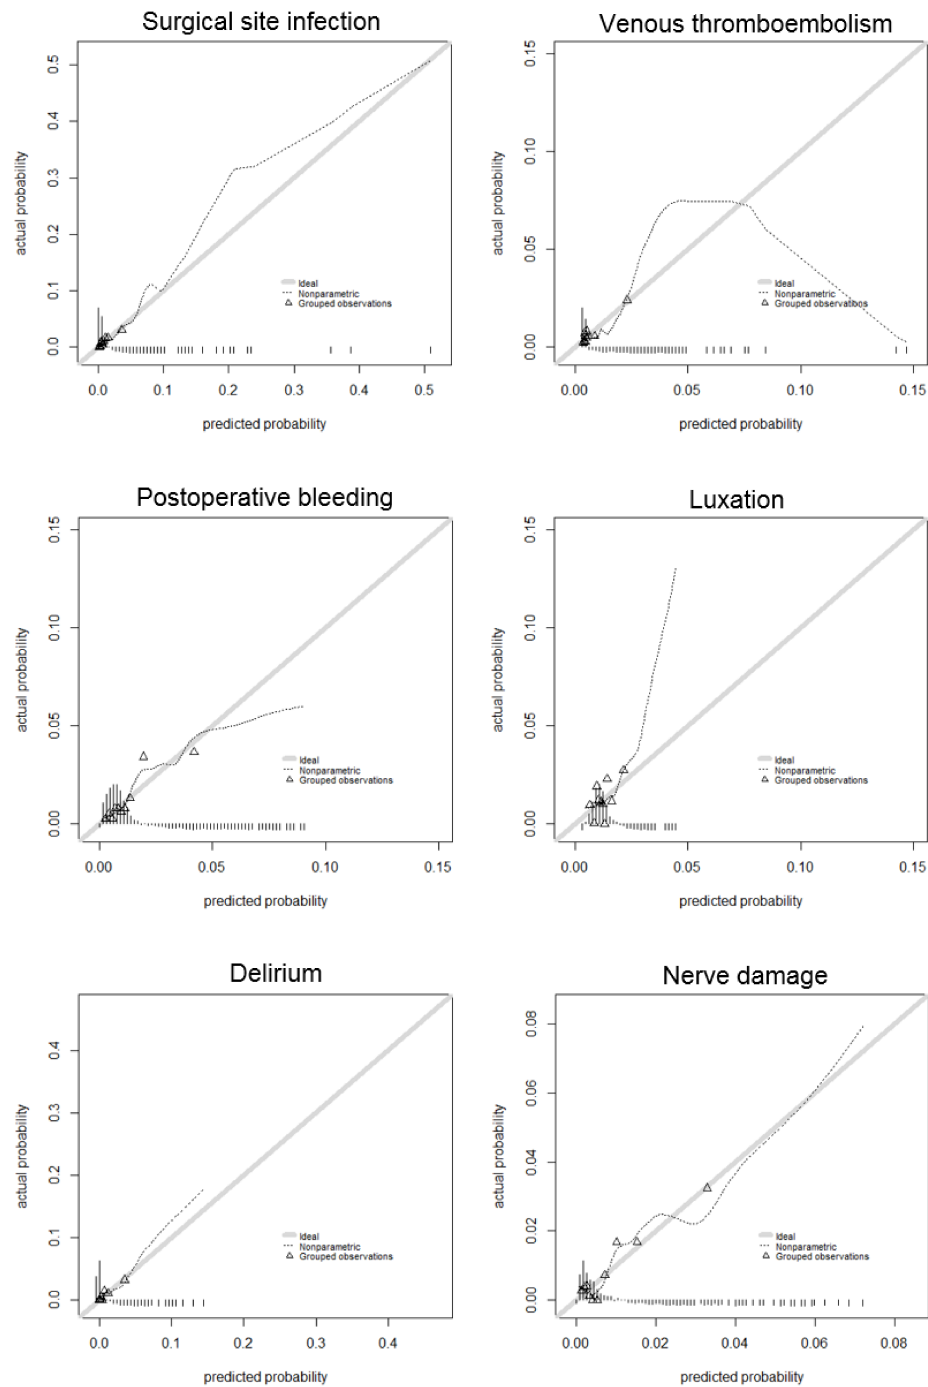

eFigure 1.2. Calibration plots with actual probability against the predicted probability for the models for surgical site infection, venous thromboembolism, postoperative bleeding, luxation, delirium and nerve damage. The triangles indicate quantiles ( $g=10$ ) of patients with a similar predicted probability of success. The grey diagonal line represents perfect agreement between predicted and actual probability



## REFERENCES

1. Almustafa MA, Ewen AM, Deakin AH, Picard F, Clarke JV, Mahmood FF. Risk Factors for Surgical Site Infection Following Lower Limb Arthroplasty: A Retrospective Cohort Analysis of 3932 Lower Limb Arthroplasty Procedures in a High Volume Arthroplasty Unit. *The Journal of Arthroplasty*. 2018;33(6):1861-7.
2. Moller AM, Villebro N, Pedersen T, Tonnesen H. Effect of preoperative smoking intervention on postoperative complications: a randomised clinical trial. *Lancet*. 2002;359(9301):114-7.
3. Namba RS, Paxton L, Fithian DC, Stone ML. Obesity and perioperative morbidity in total hip and total knee arthroplasty patients. *J Arthroplasty*. 2005;20(7 Suppl 3):46-50.
4. Chen J, Cui Y, Li X, Miao X, Wen Z, Xue Y, et al. Risk factors for deep infection after total knee arthroplasty: a meta-analysis. *Arch Orthop Trauma Surg*. 2013;133(5):675-87.
5. Podmore B, Hutchings A, van der Meulen J, Aggarwal A, Konan S. Impact of comorbid conditions on outcomes of hip and knee replacement surgery: a systematic review and meta-analysis. *BMJ Open*. 2018;8(7):e021784.
6. Migita K, Bito S, Nakamura M, Miyata S, Saito M, Kakizaki H, et al. Venous thromboembolism after total joint arthroplasty: results from a Japanese multicenter cohort study. *Arthritis Res Ther*. 2014;16(4):R154-R.
7. Yang G, Meng F, Liu Y, Kong L, Shen Y. Diabetes mellitus and risk of deep vein thrombosis after total knee replacement: a meta-analysis of cohort studies. *Int J Clin Exp Med*. 2015;8(6):9086-92.

8. Quintero JI, Cardenas LL, Navas M, Bautista MP, Bonilla GA, Llinas AM. Primary Joint Arthroplasty Surgery: Is the Risk of Major Bleeding Higher in Elderly Patients? A Retrospective Cohort Study. *J Arthroplasty*. 2016;31(10):2264-8.
9. Kunutsor SK, Barrett MC, Beswick AD, Judge A, Blom AW, Wyld V, et al. Risk factors for dislocation after primary total hip replacement: a systematic review and meta-analysis of 125 studies involving approximately five million hip replacements. *The Lancet Rheumatology*. 2019;1(2):e111-e21.
10. Huang J, Sprung J, Weingarten TN. Delirium following total joint replacement surgery. *Bosn J Basic Med Sci*. 2019;19(1):81-5.
11. Shetty T, Nguyen JT, Wu A, Sasaki M, Bogner E, Burge A, et al. Risk Factors for Nerve Injury After Total Hip Arthroplasty: A Case-Control Study. *J Arthroplasty*. 2019;34(1):151-6.
12. Kawano S, Sonohata M, Kitajima M, Mawatari M. Risk Factors for the Development of Nerve Palsy Following Primary Total Hip Arthroplasty. *Open Orthop J*. 2018;12:164-72.
13. Farrell CM, Springer BD, Haidukewych GJ, Morrey BF. Motor nerve palsy following primary total hip arthroplasty. *J Bone Joint Surg Am*. 2005;87(12):2619-25.
14. ZorginstituutNederland. Farmacotherapeutisch Kompas. 2020 [Available from: <https://farmacotherapeutischkompas.nl>].
